# Supplementary material for: Gene fusion as an important mechanism to generate new genes in the genus Oryza
Source: Genome Biol. 2022 Jun 15;23:130. doi: 10.1186/s13059-022-02696-w (PMC9199173; doi:10.1186/s13059-022-02696-w)
Supplement: Supplementary file 2 — Additional file 2. Candidate fusion gene presented in four focus species. [file 13059_2022_2696_MOESM2_ESM.xlsx]

## Sheet: Table S1 Candidate fusion gene 
Table S1 Candidate fusion gene presented in four focus species.
chimerical gene id in japonica	in indica	in glaberrima	in barthii
	Osind01g02220	Oglab01g01590	Obart01g01710		1
			Obart01g02790		1
			Obart01g03110		1
		Oglab01g03790	Obart01g04220		1
Osjap01g08660	Osind01g08490	Oglab01g06470	Obart01g07430		1234
			Obart01g25040		13
			Obart01g26420		12
			Obart01g26930		1
			Obart01g27860		1
			Obart01g35030		13
		Oglab01g34910	Obart01g40120		12
			Obart01g40910		1
			Obart01g43280		1
			Obart02g00480		1
			Obart02g01820		1
			Obart02g06500		1
			Obart02g11640		1
			Obart02g11910		1
	Osind02g26640	Oglab02g22130	Obart02g23460		1
			Obart02g24930		1	note: number 1,2,3,4 in column F means the candidate fusion gene presented in which species.
			Obart02g31950		13
	Osind02g41950		Obart02g38050		1
Osjap03g00680	Osind03g00740	Oglab03g00390	Obart03g00550		1234
		Oglab01g28270	Obart03g01190/Obart01g33610		1
			Obart03g02800		14
			Obart03g07090		1234
			Obart03g07660		1
			Obart03g09160		1
			Obart03g10140		1
Osjap03g11290			Obart03g10480		1
			Obart03g10890		124
Osjap03g13100	Osind03g12930	Oglab03g12120	Obart03g12120		1234
			Obart03g20630		1
Osjap03g30460	Osind03g31500		Obart03g27980		134
Osjap03g34330	Osind03g35550	Oglab03g30830	Obart03g31750		1
Osjap03g36400		Oglab03g32170	Obart03g33760		1
			Obart03g38310		1
			Obart03g39770		1
			Obart03g41250		12
			Obart04g08760		1
			Obart04g09560		12
			Obart04g11380		1
			Obart04g12680		1
Osjap04g30120			Obart04g26710		1
Osjap05g00530	Osind05g00510		Obart05g00520		14
Osjap05g04120	Osind05g04070	Oglab05g03490	Obart05g03830		1
		Oglab05g04140	Obart05g04470		1
			Obart05g13050		1
			Obart05g17330		1
			Obart05g20080		124
Osjap05g28230	Osind05g28520	Oglab05g23160	Obart05g25070		123
	Osind05g31580		Obart05g27940		1234
Osjap06g00940		Oglab06g00840	Obart06g00880		1
			Obart06g03390		1
	Osind06g23650		Obart06g20680		1
			Obart06g24730		1
		Oglab06g22820	Obart06g25430		1234
	Osind06g31620	Oglab06g25490	Obart06g28060		1
			Obart07g03720		1
			Obart07g03940		1
			Obart07g07590		1
			Obart07g11000		1
			Obart07g19760		134
	Osind07g21400		Obart07g21100		13
			Obart07g23980		1
			Obart07g27030		12
	Osind07g27670		Obart07g27040		1
			Obart07g27300		1
			Obart08g02200		1
			Obart08g05380		1
Osjap08g06650	Osind08g06790	Oglab08g05640	Obart08g06070		1
			Obart08g11690		12
			Obart08g11880		1
	Osind09g09040	Oglab11g05440	Obart08g16670		1
			Obart08g18520		1
			Obart08g20390		1
			Obart08g23110		1
		Oglab08g20310	Obart08g23660		1
Osjap09g15430	Osind09g15570	Oglab09g13510	Obart09g14980		1
			Obart09g15000		1
	Osind09g15930		Obart09g15360		1
			Obart09g15430		1234
			Obart09g16160		1
			Obart09g16460		1
			Obart09g18850		1
Osjap09g20460	Osind09g20560	Oglab09g18200	Obart09g19980		1
	Osind10g02110	Oglab10g02440	Obart10g02510		1
		Oglab10g08680	Obart10g09110		1
			Obart10g12420		1
	Osind10g19230	Oglab10g16090	Obart10g19720		1234
			Obart11g00370		1
			Obart11g00980		1234
Osjap11g01220	Osind12g01290/Osind11g00690	Oglab12g00800	Obart11g01060		1
Osjap12g01140	Osind12g01290/Osind11g00690	Oglab12g00800	Obart11g01060		1
			Obart11g04380		1
		Oglab11g14350	Obart11g16070		1
			Obart11g19500		1
			Obart11g22080		1234
	Osind06g17590		Obart11g22180		13
			Obart12g00450		13
		Oglab12g01890	Obart12g01910		1234
Osjap11g02640	Osind12g02780/Osind11g01990	Oglab12g02130/Oglab11g02200	Obart12g02080		1
			Obart12g02370		1
			Obart12g02600		1
		Oglab12g03070	Obart12g02950		1
			Obart12g03260		1234
Osjap12g12320	Osind12g09530	Oglab12g09470	Obart12g09410		1
			Obart12g13650		1
			Obart12g18260		1
	Osind01g06920				1234
	Osind01g11290				12
	Osind01g15670				1
	Osind01g16020				12
	Osind01g21790				1
Osjap01g25870	Osind01g26900				234
	Osind01g28070				2
Osjap01g42770	Osind01g44140				2
	Osind01g52750				2
	Osind01g52800				2
	Osind02g01750				2
	Osind02g25330				2
	Osind02g37310				2
	Osind02g37690				2
	Osind02g38400				2
	Osind02g39460				2
	Osind02g42070				234
	Osind03g03640				2
	Osind03g07990				2
	Osind03g16830				2
	Osind03g16990				2
	Osind03g18420				24
	Osind03g25560				2
	Osind03g30900				2
	Osind03g34150				2
Osjap03g44530	Osind03g45590				2
	Osind04g18090				2
	Osind04g20860				2
	Osind04g33950				2
Osjap05g02530	Osind05g02510	Oglab05g02190			2
	Osind05g03420				2
	Osind05g12550	Oglab05g09590			2
	Osind05g17820				2
	Osind05g23260				2
	Osind06g03270				2
Osjap06g07420	Osind06g07560				23
	Osind06g27610				2
Osjap07g02600	Osind07g02300				2
	Osind07g03110				24
	Osind07g04880				2
	Osind07g21110				24
	Osind07g25180				24
	Osind07g27190				2
	Osind08g03120				234
	Osind08g06190				2
	Osind08g08550				2
	Osind08g20190				2
	Osind08g22530				24
	Osind08g23660				2
	Osind08g24880				2
	Osind08g27620				24
	Osind09g01630				2
Osjap04g11160	Osind09g02760				2
	Osind09g03780				2
	Osind09g09810				2
	Osind09g11870				2
	Osind09g18210				2
	Osind09g19090				2
	Osind09g20780				2
	Osind10g01380				2
	Osind10g01570				2
	Osind11g00780				234
	Osind11g02250				2
	Osind11g05410				2
	Osind11g09560				24
	Osind11g15920				2
	Osind11g17120				2
	Osind11g17390				2
	Osind11g17970				2
Osjap12g13600	Osind12g10670				2
Osjap12g19810	Osind12g15880				234
	Osind12g16420				234
		Oglab01g06260			2
Osjap01g13630		Oglab01g10320			2
Osjap01g33510		Oglab01g24700			2
		Oglab01g37540			2
		Oglab02g00240			2
		Oglab02g12130			2
Osjap02g40340		Oglab02g33340			2
		Oglab02g34160			2
		Oglab02g34920			2
		Oglab03g05040			34
		Oglab03g11620			3
		Oglab03g30700			34
		Oglab03g35760			34
		Oglab03g38510			3
		Oglab03g39920			3
		Oglab04g03860			3
		Oglab04g27220			3
		Oglab05g04450			3
		Oglab05g07040			3
		Oglab05g14020			3
		Oglab05g20580			3
Osjap06g03080		Oglab06g02870			3
		Oglab06g21340			3
		Oglab06g24190			3
		Oglab06g25720			3
		Oglab06g26450			3
		Oglab07g03220			34
		Oglab07g20540			3
		Oglab08g01630			3
		Oglab08g04500			3
		Oglab08g10710			3
		Oglab08g13140			3
		Oglab08g15520			34
		Oglab09g14970			3
		Oglab09g17780			3
		Oglab09g18980			3
		Oglab10g03910			3
		Oglab10g14420			3
Osjap11g01730		Oglab11g01340			3
Osjap11g01770		Oglab11g01510			3
		Oglab11g06530			3
		Oglab11g18520			3
		Oglab11g20100			34
		Oglab12g00050			3
		Oglab12g01430			3
		Oglab12g02960			3
		Oglab12g06650			3
		Oglab12g11360			34
		Oglab12g13410			3
Osjap01g00500					3
Osjap01g00640					34
Osjap01g05660					3
Osjap01g06620					3
Osjap01g30020					3
Osjap01g31520					3
Osjap01g50410					34
Osjap02g04220					3
Osjap02g16210					34
Osjap02g19520					3
Osjap02g23220					3
Osjap02g28800					3
Osjap02g30600					4
Osjap02g36880					4
Osjap02g39740					4
Osjap02g41000					4
Osjap03g00710					4
Osjap03g14020					4
Osjap03g15380					4
Osjap03g23720					4
Osjap03g29590					4
Osjap03g35910					4
Osjap03g39550					4
Osjap03g40400					4
Osjap03g44070					4
Osjap03g44320					4
Osjap04g02830					4
Osjap04g13840					4
Osjap04g19980					4
Osjap04g27970					4
Osjap04g30680					4
Osjap04g34120					4
Osjap04g35010					4
Osjap05g00220					4
Osjap05g14570					4
Osjap05g20040					4
Osjap05g23780					4
Osjap05g26770					4
Osjap05g28940					4
Osjap05g29140					4
Osjap05g29150					4
Osjap05g30140					4
Osjap06g00390					4
Osjap06g03630					4
Osjap06g08210					4
Osjap06g14300					4
Osjap06g27840					4
Osjap06g31140					4
Osjap06g33090					4
Osjap07g04240					4
Osjap07g06350					4
Osjap07g11390					4
Osjap07g22430					4
Osjap07g25530					4
Osjap07g25960					4
Osjap07g28390					4
Osjap07g29350					4
Osjap08g04940					4
Osjap08g10540					4
Osjap08g13760					4
Osjap08g19480					4
Osjap08g22730					4
Osjap09g00070					4
Osjap09g03990					4
Osjap09g06840					4
Osjap09g17720					4
Osjap10g04950					4
Osjap10g12540					4
Osjap10g14600					4
Osjap10g15240					4
Osjap11g00600					4
Osjap11g03190					4
Osjap11g03220					4
Osjap11g21440					4
Osjap11g25180					4
Osjap12g02200					4
Osjap12g02870					4
Osjap12g06950					4
Osjap12g18490					4
Osjap12g24450					3
