# Supplementary material for: Gene fusion as an important mechanism to generate new genes in the genus Oryza
Source: Genome Biol. 2022 Jun 15;23:130. doi: 10.1186/s13059-022-02696-w (PMC9199173; doi:10.1186/s13059-022-02696-w)
Supplement: Supplementary file 4 — Additional file 4. FPKM of fusion gene and short copy homologs in O. sativa v.g. japonica, O. barthii, O. glaberrima, O. punctate, O. branchyantha and Leersia. [file 13059_2022_2696_MOESM4_ESM.xlsx]

## Sheet: Table S3
Table S3 FPKM of fusion gene and short copy homologues in O. sativa v.g. japonica, O. barthii, O. glaberrima, O. punctate, O. branchyantha and Leersia.
1-18: chimerical gene and its homologous gene ids						19-72: the FPKM value for relative genes in three tissues							No_id: indicate the chimerical gene have no homologous relative species
LOC_Os08g03290 is house keeping gene which may give an comparison to others.
1	2	3	4	5	6	7	8	9	10	11	12	13	14	15	16	17	18	19	20	21	22	23	24	25	26	27	28	29	30	31	32	33	34	35	36	37	38	39	40	41	42	43	44	45	46	47	48	49	50
Chimerical IDs	Short copy IDs (L)	Short copy IDs (M)	Barthii long copty IDs	Barthii short copty IDs	Barthii short copy IDs	Glab long copy IDs	Glab short copy IDs	Glab short copy IDs	Punc long copy IDs	Punc short copy IDs	Punc short copy IDs	Brachy long copyIDs	Brachy short copy IDs	Brachy short copy IDs	Leersia Long copy IDs	Leersia short copy IDs	Leersia short copy IDs	Chi-Leaf	Chi-Root	Chi-Panicle	Short1-Leaf	Short1-Root	Short1-Panicle	Short2-Leaf	Short2-Root	Short2-Panicle	Barthii-long-Leaf	Barhii-long-Root	Barthii-long-Panicle	Barthii-short1-Leaf	Barthii-short1-Root	Barthii-short1-Panicle	Barthii-short2-Leaf	Barthii-short2-Root	Barthii-short2-Panicle	Glab-long-Leaf	Glab-long-Root	Glab-long-Panicle	Glab-short1-Leaf	Glab-short1-Root	Glab-short1-Panicle	Glab-short2-Leaf	Glab-short2-Root	Glab-short2-Panicle	Punc-long-Leaf	Punc-long-Root	Punc-long-Panicle	Punc-short1-Leaf	Punc-short1-Root
LOC_Os08g03290	LOC_Os08g03290	LOC_Os08g03290	LOC_Os08g03290	LOC_Os08g03290	LOC_Os08g03290	LOC_Os08g03290	LOC_Os08g03290	LOC_Os08g03290	LOC_Os08g03290	LOC_Os08g03290	LOC_Os08g03290	LOC_Os08g03290	LOC_Os08g03290	LOC_Os08g03290	LOC_Os08g03290	LOC_Os08g03290	LOC_Os08g03290	131.746	773.211	1118.38	131.746	773.211	1118.38	131.746	773.211	1118.38	131.746	773.211	1118.38	131.746	773.211	1118.38	131.746	773.211	1118.38	131.746	773.211	1118.38	131.746	773.211	1118.38	131.746	773.211	1118.38	131.746	773.211	1118.38	131.746	773.211
Osjap01g00500.1	No_id	No_id	No_id	Obart01g00460.1	Obart06g14780.1	No_id	Oglab01g00390.1	Oglab01g00380.1	No_id	Opunc01g00410.2	Opunc06g13790.1	No_id	No_id	No_id	No_id	No_id	No_id	0	0	55.0649	0	0	0	0	0	0	0	0	0	10.817	8.68808	4.88218	14.4346	7.0928	17.9772	0	0	0	1.34457	0	9.99397	6.9853	0	47.9125	0	0	0	0	0
Osjap01g00640.1	Osjap05g00080.1	Osjap04g25390.2	No_id	Obart05g00050.1	Obart01g00590.1	No_id	Oglab05g00040.1	Oglab01g00510.1	No_id	Opunc01g00510.1	Opunc09g01380.1	No_id	Obrac09g00870.1	Obrac05g00060.2	No_id	Lperr09g00030.1	Lperr01g00510.1	5.9292	6.43553	0	0	3.22922	4.17553	0	18.5411	0	0	0	0	4.42034	6.83656	3.05872	21.5113	19.2674	5.83597	0	0	0	0	0	0	2.98306	0	8.6784	0	0	0	5.10794	6.18996
Osjap01g00640.2	Osjap05g00080.1	Osjap04g25390.2	No_id	Obart05g00050.1	Obart01g00590.1	No_id	Oglab05g00040.1	Oglab01g00510.1	No_id	Opunc01g00510.1	Opunc09g01380.1	No_id	Obrac09g00870.1	Obrac05g00060.2	No_id	Lperr09g00030.1	Lperr01g00510.1	5.9292	6.43553	0	0	3.22922	4.17553	0	18.5411	0	0	0	0	4.42034	6.83656	3.05872	21.5113	19.2674	5.83597	0	0	0	0	0	0	2.98306	0	8.6784	0	0	0	5.10794	6.18996
Osjap01g00640.3	Osjap05g00080.1	Osjap04g25390.2	No_id	Obart05g00050.1	Obart01g00590.1	No_id	Oglab05g00040.1	Oglab01g00510.1	No_id	Opunc01g00510.1	Opunc09g01380.1	No_id	Obrac09g00870.1	Obrac05g00060.2	No_id	Lperr09g00030.1	Lperr01g00510.1	5.9292	6.43553	0	0	3.22922	4.17553	0	18.5411	0	0	0	0	4.42034	6.83656	3.05872	21.5113	19.2674	5.83597	0	0	0	0	0	0	2.98306	0	8.6784	0	0	0	5.10794	6.18996
Osjap01g00640.4	Osjap05g00080.1	Osjap04g25390.2	No_id	Obart05g00050.1	Obart01g00590.1	No_id	Oglab05g00040.1	Oglab01g00510.1	No_id	Opunc01g00510.1	Opunc09g01380.1	No_id	Obrac09g00870.1	Obrac05g00060.2	No_id	Lperr09g00030.1	Lperr01g00510.1	5.9292	6.43553	0	0	3.22922	4.17553	0	18.5411	0	0	0	0	4.42034	6.83656	3.05872	21.5113	19.2674	5.83597	0	0	0	0	0	0	2.98306	0	8.6784	0	0	0	5.10794	6.18996
Osjap01g05660.1	No_id	No_id	No_id	Obart04g18400.1	Obart01g05020.1	No_id	Oglab04g16820.1	Oglab01g04570.1	No_id	Opunc01g04830.3	Opunc01g04840.2	No_id	Obrac04g11710.1	Obrac01g03780.3	No_id	Lperr01g04710.1	Lperr04g14860.2	0	0	0	0	0	0	0	0	0	0	0	0	4.13573	7.4869	5.85632	7.96049	18.3857	9.42913	0	0	0	0	0	0	0.875633	0	8.07654	0	0	0	0	0
Osjap01g06620.1	No_id	No_id	No_id	Obart01g05730.1	Obart01g05740.1	No_id	Oglab01g05340.1	Oglab01g05350.1	No_id	Opunc01g00250.2	Opunc01g05590.1	No_id	Obrac06g09410.4	Obrac01g23150.1	No_id	Lperr01g00210.1	Lperr01g05400.1	0	0	0	0	0	0	0	0	0	0	0	0	1.77429	2.24573	2.59212	17.3497	24.8039	42.4222	0	0	0	2.02933	0	5.79524	50.8466	223.47	54.2624	0	0	0	0	0
Osjap01g06620.2	No_id	No_id	No_id	Obart01g05730.1	Obart01g05740.1	No_id	Oglab01g05340.1	Oglab01g05350.1	No_id	Opunc01g00250.2	Opunc01g05590.1	No_id	Obrac06g09410.4	Obrac01g23150.1	No_id	Lperr01g00210.1	Lperr01g05400.1	0	0	0	0	0	0	0	0	0	0	0	0	1.77429	2.24573	2.59212	17.3497	24.8039	42.4222	0	0	0	2.02933	0	5.79524	50.8466	223.47	54.2624	0	0	0	0	0
Osjap01g06620.3	No_id	No_id	No_id	Obart01g05730.1	Obart01g05740.1	No_id	Oglab01g05340.1	Oglab01g05350.1	No_id	Opunc01g00250.2	Opunc01g05590.1	No_id	Obrac06g09410.4	Obrac01g23150.1	No_id	Lperr01g00210.1	Lperr01g05400.1	0	0	0	0	0	0	0	0	0	0	0	0	1.77429	2.24573	2.59212	17.3497	24.8039	42.4222	0	0	0	2.02933	0	5.79524	50.8466	223.47	54.2624	0	0	0	0	0
Osjap01g06620.4	No_id	No_id	No_id	Obart01g05730.1	Obart01g05740.1	No_id	Oglab01g05340.1	Oglab01g05350.1	No_id	Opunc01g00250.2	Opunc01g05590.1	No_id	Obrac06g09410.4	Obrac01g23150.1	No_id	Lperr01g00210.1	Lperr01g05400.1	0	0	0	0	0	0	0	0	0	0	0	0	1.77429	2.24573	2.59212	17.3497	24.8039	42.4222	0	0	0	2.02933	0	5.79524	50.8466	223.47	54.2624	0	0	0	0	0
Osjap01g06620.5	No_id	No_id	No_id	Obart01g05730.1	Obart01g05740.1	No_id	Oglab01g05340.1	Oglab01g05350.1	No_id	Opunc01g00250.2	Opunc01g05590.1	No_id	Obrac06g09410.4	Obrac01g23150.1	No_id	Lperr01g00210.1	Lperr01g05400.1	0	0	0	0	0	0	0	0	0	0	0	0	1.77429	2.24573	2.59212	17.3497	24.8039	42.4222	0	0	0	2.02933	0	5.79524	50.8466	223.47	54.2624	0	0	0	0	0
Osjap01g06620.6	No_id	No_id	No_id	Obart01g05730.1	Obart01g05740.1	No_id	Oglab01g05340.1	Oglab01g05350.1	No_id	Opunc01g00250.2	Opunc01g05590.1	No_id	Obrac06g09410.2	Obrac01g23150.1	No_id	Lperr01g00210.1	Lperr01g05400.1	0	0	0	0	0	0	0	0	0	0	0	0	1.77429	2.24573	2.59212	17.3497	24.8039	42.4222	0	0	0	2.02933	0	5.79524	50.8466	223.47	54.2624	0	0	0	0	0
Osjap01g08660.1	Osjap01g29230.2	Osjap05g00560.2	Obart01g07430.1	Obart05g00540.1	Obart01g25090.1	Oglab01g06470.1	Oglab05g00530.1	Oglab01g21070.2	No_id	Opunc01g07170.1	Opunc01g07160.1	No_id	Obrac01g05760.3	Obrac01g05770.3	No_id	Lperr01g07030.1	Lperr01g07040.2	0	3.11799	0	3.89585	12.58	2.9983	2.80565	7.98159	10.3272	0	0	0	3.083	5.97719	5.95849	11.957	6.23036	2.08258	4.20385	0	2.75025	0	0	0	4.97547	0	9.74074	0	0	0	5.5205	0
Osjap01g13630.1	No_id	No_id	No_id	Obart01g12130.1	Obart01g12120.1	Oglab01g10320.1	No_id	No_id	No_id	Opunc01g11830.1	Opunc05g02420.2	Obrac01g09290.1	No_id	No_id	No_id	Lperr01g11090.1	Lperr05g21710.3	0	29.363	40.3659	0	0	0	0	0	0	0	0	0	29.2309	45.5109	62.0021	112.5	141.555	62.0021	11.6492	0	60.451	0	0	0	0	0	0	0	0	0	0	18.9919
Osjap01g25870.1	No_id	No_id	No_id	Obart01g21780.1	Obart01g21980.1	Oglab01g18120.1	Oglab01g17930.1	Oglab01g18150.1	No_id	Opunc10g14020.1	Opunc01g22160.1	No_id	No_id	No_id	No_id	Lperr01g18740.1	Lperr01g18750.1	0	0	0	0	0	0	0	0	0	0	0	0	0	0	0	0	0	0.71989	0	0	0	0	0	0	0	0	1.59752	0	0	0	0	0
Osjap01g30020.1	No_id	No_id	No_id	Obart01g25800.1	Obart01g25790.1	No_id	Oglab01g21760.1	Oglab01g21750.1	No_id	Opunc01g25700.1	Opunc01g25710.1	No_id	Obrac01g19520.1	Obrac01g19510.1	No_id	Lperr01g22060.1	Lperr01g22050.1	0	2255.47	48.062	0	0	0	0	0	0	0	0	0	9.67835	24.1552	11.4542	66.0763	22.3886	31.1167	0	0	0	2.60582	23.3574	9.82098	9.30398	0	27.1795	0	0	0	28.9239	23.4248
Osjap01g31520.1	Osjap01g14430.1	Osjap01g31460.1	Obart01g27180.1	Obart01g27130.1	Obart01g25360.1	Oglab01g23070.1	Oglab01g09850.1	Oglab01g23050.1	No_id	Opunc01g36860.1	Opunc01g27140.1	Obrac01g20650.1	Obrac01g20500.1	Obrac01g20630.1	No_id	Lperr01g11680.1	Lperr01g23240.1	0	26.9485	0	0	0	0	0	78.1832	0	0	0	0	0	49.6836	0	161.74	222.011	41.0007	0	0	0	0	0	0	0.58547	0	0	0	0	0	0	0
Osjap01g33510.1	Osjap03g28950.1	Osjap02g13850.1	No_id	Obart02g12550.1	Obart01g29130.1	Oglab01g24700.2	Oglab03g26370.1	Oglab02g12410.1	No_id	Opunc01g28950.1	Opunc02g11230.1	Obrac01g22030.2	Obrac01g23640.1	Obrac02g16330.1	No_id	Lperr01g08580.1	Lperr01g24930.2	0	8.62689	0	0	4.10843	2.54592	4.03307	6.53079	7.75638	0	0	0	5.57424	9.96344	5.6872	63.1066	4.3634	9.43564	0	0	0	0	0	0	0	0	0	0	0	0	0	0
Osjap01g33510.2	Osjap03g28950.1	Osjap02g13850.1	No_id	Obart02g12550.1	Obart01g29130.1	Oglab01g24700.2	Oglab03g26370.1	Oglab02g12410.1	No_id	Opunc01g28950.1	Opunc02g11230.1	Obrac01g22030.2	No_id	No_id	No_id	Lperr01g08580.1	Lperr01g24930.2	0	8.62689	0	0	4.10843	2.54592	4.03307	6.53079	7.75638	0	0	0	5.57424	9.96344	5.6872	63.1066	4.3634	9.43564	0	0	0	0	0	0	0	0	0	0	0	0	0	0
Osjap01g33510.3	Osjap03g28950.1	Osjap02g13850.1	No_id	Obart02g12550.1	Obart01g29130.1	Oglab01g24700.2	Oglab03g26370.1	Oglab02g12410.1	No_id	Opunc01g28950.1	Opunc02g11230.1	Obrac01g22030.2	No_id	No_id	No_id	Lperr01g08580.1	Lperr01g24930.2	0	8.62689	0	0	4.10843	2.54592	4.03307	6.53079	7.75638	0	0	0	5.57424	9.96344	5.6872	63.1066	4.3634	9.43564	0	0	0	0	0	0	0	0	0	0	0	0	0	0
Osjap01g42770.1	Osjap03g27560.1	Osjap01g08100.1	No_id	Obart01g37420.1	Obart01g37410.1	No_id	Oglab01g32230.1	Oglab01g32220.1	No_id	Opunc01g36340.1	Opunc01g36330.1	No_id	Obrac01g28840.1	Obrac01g28830.1	No_id	Lperr01g32140.1	Lperr01g32130.1	1.1711	0	4.09756	0	0.242706	3.10919	108.642	13.1822	295.902	0	0	0	4.26858	8.05106	5.07213	105.866	119.116	36.9522	0	0	0	1.30595	32.9706	1.91762	77.2231	0	151.086	0	0	0	0	5.5975
Osjap01g50410.1	Osjap05g17010.3	Osjap05g22890.1	No_id	Obart01g44370.1	Obart01g44360.2	No_id	Oglab03g03400.1	Oglab05g14070.1	No_id	Opunc01g43310.1	Opunc01g43300.2	No_id	Obrac01g34780.1	Obrac01g34770.2	No_id	Lperr03g14360.1	Lperr01g38790.2	9.44058	23.8838	16.9007	2.67743	3.36464	4.11842	0	0.608451	9.78919	0	0	0	0	0	1.3636	13.8178	12.4623	4.72936	0	0	0	0	0	0	0	0	0	0	0	0	0	0
Osjap01g50410.2	Osjap05g17010.3	Osjap05g22890.1	No_id	Obart01g44370.1	Obart01g44360.2	No_id	Oglab03g03400.1	Oglab05g14070.1	No_id	Opunc01g43310.1	Opunc01g43300.4	No_id	Obrac01g34780.1	Obrac01g34770.2	No_id	Lperr03g14360.1	Lperr01g38790.4	9.44058	23.8838	16.9007	2.67743	3.36464	4.11842	0	0.608451	9.78919	0	0	0	0	0	1.3636	13.8178	12.4623	4.72936	0	0	0	0	0	0	0	0	0	0	0	0	0	0
Osjap02g04220.4	No_id	No_id	No_id	Obart05g26570.1	Obart02g03990.2	No_id	Oglab11g17910.1	Oglab02g03990.2	No_id	Opunc02g02500.1	Opunc02g04060.1	No_id	No_id	No_id	No_id	Lperr02g08210.1	Lperr05g22210.1	0	12.367	16.9261	0	0	0	0	0	0	0	0	0	60.9221	0	86.0215	121.899	69.4908	79.3429	0	0	0	0	0	0	0.874333	0	3.09997	0	0	0	0	0
Osjap02g04220.5	No_id	No_id	No_id	Obart05g26570.1	Obart02g03990.2	No_id	Oglab11g17910.1	Oglab02g03990.2	No_id	Opunc02g02500.1	Opunc05g24160.1	No_id	No_id	No_id	No_id	Lperr02g08210.1	Lperr05g22210.1	0	12.367	16.9261	0	0	0	0	0	0	0	0	0	60.9221	0	86.0215	121.899	69.4908	79.3429	0	0	0	0	0	0	0.874333	0	3.09997	0	0	0	0	0
Osjap02g16210.1	No_id	No_id	No_id	Obart09g03220.1	Obart02g14710.1	No_id	Oglab02g14090.1	Oglab06g12810.1	No_id	Opunc01g07390.1	Opunc02g13160.2	No_id	No_id	No_id	No_id	No_id	No_id	8.79966	0	10.6674	0	0	0	0	0	0	0	0	0	0	0	0	46.7253	12.4038	14.556	0	0	0	0	0	0	0.176862	0	0	0	0	0	0	0
Osjap02g19520.2	Osjap03g32140.1	Osjap02g06360.1	Obart02g17220.1	Obart01g21490.2	Obart02g17150.1	Oglab02g16690.1	No_id	No_id	Opunc02g15310.1	Opunc03g27000.1	Opunc01g21720.2	No_id	Obrac03g21720.2	Obrac01g16240.1	No_id	Lperr01g18440.1	Lperr02g13790.2	0	0	0	0	0	0	0	0	3.53905	0	0	12.7549	0	0	0	0	0	2.80643	0	0	0	0	0	0	0	0	0	0	0	0	0	0
Osjap02g23220.1	Osjap04g16230.4	Osjap03g34460.2	No_id	Obart02g20410.1	Obart03g31870.1	No_id	Oglab04g11660.2	Oglab03g30900.1	Opunc02g18320.2	Opunc02g18320.3	Opunc04g11260.2	Obrac02g14310.3	Obrac04g07710.2	Obrac03g23560.1	No_id	Lperr02g16420.1	Lperr02g16430.2	0	11.1984	0	0	1.33097	0.798204	9.69763	18.0103	18.512	0	0	0	0	7.03982	0	22.4183	26.102	8.06485	0	0	0	0	0	0	0	0	0	0	0	0	0	0
Osjap02g28800.3	Osjap11g07330.1	Osjap04g33800.1	No_id	Obart02g25340.1	Obart02g25330.2	No_id	Oglab11g05820.1	Oglab03g04200.1	Opunc02g23140.1	No_id	No_id	No_id	Obrac02g18270.1	Obrac02g18260.1	Lperr02g20690.1	Lperr02g11790.1	Lperr10g02180.1	0	5.11648	0	0	0	21.3061	0	56.1329	36.983	0	0	0	1.47861	12.9651	2.0111	9.36075	12.9651	0	0	0	0	0	0	0	0	0	0	0	0	6.63282	0	0
Osjap02g30600.1	Osjap04g25080.3	Osjap04g31350.1	No_id	Obart02g26980.2	Obart05g12910.2	No_id	Oglab02g25140.1	Oglab02g10070.1	No_id	Opunc03g26570.3	Opunc02g24620.1	No_id	No_id	No_id	No_id	No_id	No_id	13.7497	18.271	21.0132	0	0	1.65217	29.3472	31.6583	63.1826	0	0	0	8.23997	28.4983	17.0964	94.0055	0	96.0369	0	0	0	0	0	0	0	0	0	0	0	0	0	0
Osjap02g36880.1	Osjap06g08870.1	Osjap06g08840.1	No_id	No_id	No_id	No_id	Oglab02g30260.1	Oglab02g30250.1	No_id	Opunc02g30230.1	Opunc02g30220.3	Obrac02g23910.1	Obrac06g05990.1	Obrac05g14180.1	No_id	Lperr02g26800.1	Lperr02g26790.1	0	0	0	0	0	0	0	0	0	0	0	0	0	0	0	0	0	0	0	0	0	0	0	0	0	0	0	0	0	0	0	0
Osjap02g39740.1	No_id	No_id	No_id	Obart09g19950.1	Obart02g35650.1	No_id	Oglab02g32840.2	Oglab09g18170.1	No_id	Opunc02g00500.1	Opunc02g32820.2	No_id	Obrac02g26130.1	Obrac02g26120.1	No_id	Lperr02g29300.1	Lperr10g08790.1	0	0	0	0	0	0	0	0	0	0	0	0	0	0	0.0498951	4.99727	11.8866	1.45531	0	0	0	0	0	0	0	0	0	0	0	0	0	0
Osjap02g40340.1	Osjap05g23970.1	Osjap02g41540.1	No_id	Obart03g24380.1	Obart02g36180.3	No_id	Oglab02g33340.1	Oglab03g24170.1	No_id	Opunc04g19490.1	Opunc03g22570.2	No_id	Obrac05g14470.1	Obrac03g19420.1	No_id	Lperr06g23460.1	Lperr02g29800.1	137.255	311.316	0	0	0	0	21.2273	33.1843	15.7133	0	0	0	74.8198	80.1108	34.1771	211.086	207.048	194.829	0	0	0	0	0	0	0	0	0	0	0	0	0	0
Osjap02g41000.1	No_id	No_id	No_id	Obart02g36720.1	Obart06g15760.1	No_id	Oglab02g33870.1	Oglab02g33890.1	No_id	Opunc02g33950.1	Opunc06g14370.1	No_id	Obrac02g27110.2	Obrac02g27090.1	No_id	Lperr02g30380.1	Lperr06g11770.4	0	18.0116	0	0	0	0	0	0	0	0	0	0	0	0	1.43348	8.50525	0	1.92161	0	0	0	0	0	0	0	0	0	0	0	0	0	0
Osjap02g41000.2	No_id	No_id	No_id	Obart02g36720.1	Obart06g15760.1	No_id	Oglab02g33870.1	Oglab02g33890.1	No_id	Opunc02g33950.1	Opunc06g14370.1	No_id	Obrac02g27110.2	Obrac02g27090.1	No_id	Lperr02g30380.2	Lperr06g11770.4	0	18.0116	0	0	0	0	0	0	0	0	0	0	0	0	1.43348	8.50525	0	1.92161	0	0	0	0	0	0	0	0	0	0	0	0	0	0
Osjap02g41000.3	No_id	No_id	No_id	Obart02g36720.1	Obart06g15760.1	No_id	Oglab02g33870.1	Oglab02g33890.3	No_id	Opunc02g33950.1	Opunc06g14370.1	No_id	Obrac06g10650.1	Obrac02g27110.2	No_id	Lperr02g30380.1	Lperr06g11770.2	0	18.0116	0	0	0	0	0	0	0	0	0	0	0	0	1.43348	8.50525	0	1.92161	0	0	0	0	0	0	0	0	0	0	0	0	0	0
Osjap03g00680.1	Osjap12g08580.1	Osjap02g42090.1	Obart03g00550.1	Obart12g06510.1	Obart02g37790.1	Oglab03g00390.1	Oglab03g02050.1	Oglab02g34920.1	No_id	Opunc03g00470.1	Opunc11g04590.1	No_id	Obrac02g27970.1	Obrac02g10260.1	No_id	Lperr03g00570.1	Lperr04g11360.1	0	0	0	0	0	0	4.04021	2.23806	6.63123	0	0	0	0	0	0	0	0	0	3.34192	0	89.3608	0	0	0	0	0	0	0	0	0	0	0
Osjap03g00680.2	Osjap12g08580.1	Osjap02g42090.1	Obart03g00550.1	Obart12g06510.1	Obart02g37790.1	Oglab03g00390.1	Oglab03g02050.1	Oglab02g34920.1	No_id	Opunc03g00470.1	Opunc03g03130.2	No_id	Obrac02g27970.1	Obrac02g10260.1	No_id	Lperr03g00570.1	Lperr04g11360.1	0	0	0	0	0	0	4.04021	2.23806	6.63123	0	0	0	0	0	0	0	0	0	3.34192	0	89.3608	0	0	0	0	0	0	0	0	0	0	0
Osjap03g00710.1	Osjap08g14010.2	Osjap10g20350.1	No_id	Obart03g00600.1	Obart03g00580.1	No_id	No_id	No_id	No_id	Opunc03g00530.1	Opunc03g00510.2	No_id	Obrac10g11260.2	Obrac03g00430.2	No_id	Lperr03g00610.3	Lperr10g13450.1	0	0	0	0	1.85031	7.36715	83.3039	81.6083	120.393	0	0	0	32.0578	31.5865	48.4332	110.251	115.52	74.9134	0	0	0	0	0	0	0	0	0	0	0	0	25.8106	65.8361
Osjap03g11290.1	Osjap03g11310.1	Osjap01g06090.1	Obart03g10480.1	Obart03g10500.1	Obart01g05330.1	No_id	Oglab01g01190.1	Oglab03g10450.1	No_id	Opunc03g10110.1	Opunc03g10130.1	No_id	No_id	No_id	No_id	No_id	No_id	0	0	0	0	0	0	2.05759	1.65027	5.58735	0	0	0	0	0	0	32.9696	29.8454	30.6755	0	0	0	0	0	0	0.588505	0	5.59994	0	0	0	0	0
Osjap03g13100.1	Osjap04g16240.1	Osjap12g01140.1	Obart03g12120.1	Obart06g01490.1	Obart11g01060.1	Oglab03g12120.1	Oglab12g00800.1	Oglab06g01620.1	No_id	Opunc01g28650.1	Opunc03g11680.1	No_id	Obrac03g09720.2	Obrac04g09430.1	No_id	Lperr03g17470.1	Lperr03g10720.1	0	4.70804	0	0	0.20802	0.141671	2.75887	1.29322	3.38542	6.84716	12.0779	10.2992	2.91034	3.14738	2.37668	0	0	10.4761	0	0	0	0	0	0	0	0	0	0	0	0	0	0
Osjap03g14020.1	No_id	No_id	No_id	Obart01g06740.1	Obart03g12970.1	No_id	No_id	No_id	No_id	Opunc12g06380.1	Opunc03g12540.1	No_id	Obrac09g12510.3	Obrac03g10420.2	No_id	Lperr03g30240.1	Lperr03g11490.1	0	0	5.97773	0	0	0	0	0	0	0	0	0	0	0	1.59956	0	1.83004	2.09183	0	0	0	0	0	0	0	0	0	0	0	0	0	0
Osjap03g15380.1	No_id	No_id	No_id	Obart03g14310.1	Obart03g14320.1	No_id	Oglab03g14300.1	Oglab03g14290.1	No_id	Opunc03g13810.1	Opunc03g13830.1	No_id	No_id	No_id	No_id	No_id	No_id	0	0	0	0	0	0	0	0	0	0	0	0	3.81467	3.80422	3.23555	6.77296	19.6157	4.93229	0	0	0	0	0	0	0	0	0	0	0	0	0	0
Osjap03g15380.2	No_id	No_id	No_id	Obart03g14310.1	Obart03g14320.1	No_id	Oglab03g14300.2	Oglab03g14290.1	No_id	Opunc03g13810.1	Opunc03g13830.1	No_id	No_id	No_id	No_id	No_id	No_id	0	0	0	0	0	0	0	0	0	0	0	0	3.81467	3.80422	3.23555	6.77296	19.6157	4.93229	0	0	0	0	0	0	0	0	0	0	0	0	0	0
Osjap03g23720.1	No_id	No_id	No_id	No_id	No_id	No_id	Oglab03g21680.1	Oglab03g21650.1	No_id	Opunc03g20720.1	Opunc03g20710.1	No_id	Obrac03g17290.1	Obrac03g17280.1	No_id	Lperr03g18790.2	Lperr03g18780.1	0	0	0	0	0	0	0	0	0	0	0	0	0	0	0	0	0	0	0	0	0	0	0	0	1.87976	0	11.6798	0	0	0	4.44565	0
Osjap03g29590.1	No_id	No_id	No_id	Obart03g27180.1	Obart03g27190.1	No_id	Oglab03g26870.1	Oglab03g26860.1	Opunc03g24820.1	Opunc03g24820.2	Opunc03g24830.1	No_id	No_id	No_id	No_id	Lperr03g22510.1	Lperr03g22520.1	0	0	0	0	0	0	0	0	0	0	0	0	8.23542	2.72142	2.48884	22.7046	26.2812	24.1274	0	0	0	0	0	0	0	0	0	25.9105	30.2502	43.6882	25.9105	30.2502
Osjap03g29590.2	No_id	No_id	No_id	Obart03g27180.1	Obart03g27190.1	No_id	Oglab03g26870.1	Oglab03g26860.1	Opunc03g24820.1	Opunc03g24820.4	Opunc03g24830.1	No_id	No_id	No_id	No_id	Lperr03g22510.1	Lperr03g22520.1	0	0	0	0	0	0	0	0	0	0	0	0	8.23542	2.72142	2.48884	22.7046	26.2812	24.1274	0	0	0	0	0	0	0	0	0	25.9105	30.2502	43.6882	25.9105	30.2502
Osjap03g29590.3	No_id	No_id	No_id	Obart03g27180.1	Obart03g27190.1	No_id	Oglab03g26870.1	Oglab03g26860.1	Opunc03g24820.1	Opunc03g24820.3	Opunc03g24830.1	No_id	No_id	No_id	No_id	Lperr03g22510.1	Lperr03g22520.1	0	0	0	0	0	0	0	0	0	0	0	0	8.23542	2.72142	2.48884	22.7046	26.2812	24.1274	0	0	0	0	0	0	0	0	0	25.9105	30.2502	43.6882	25.9105	30.2502
Osjap03g30460.1	Osjap03g30380.1	Osjap12g24400.2	Obart03g27980.2	Obart03g27900.1	Obart12g19300.1	No_id	Oglab12g17460.4	Oglab03g27330.1	No_id	Opunc03g26870.1	Opunc03g25490.1	No_id	No_id	No_id	No_id	Lperr03g23190.1	Lperr03g23200.1	0	0	0	0	0	0	17.1399	134.543	29.1509	0	0	0	0	0	0	24.4598	83.2274	18.8665	0	0	0	0	0	0	0	0	0	0	0	0	0	0
Osjap03g34330.1	Osjap03g39110.1	Osjap10g05370.1	Obart03g31750.1	Obart03g36200.1	Obart10g04600.1	Oglab03g30830.1	Oglab10g04340.1	Oglab03g34460.1	No_id	Opunc01g42030.1	Opunc03g28940.2	No_id	Obrac02g16280.1	Obrac03g23440.1	No_id	Lperr03g30520.1	Lperr03g26400.1	100.849	182.119	97.4503	0	0	0	53.6084	0.881613	13.1064	63.3555	45.515	0	0	0	0	63.0263	3.0356	12.4788	0	0	0	0	0	0	0	0	0	0	0	0	0	4.98289
Osjap03g35910.1	No_id	No_id	No_id	Obart03g39130.1	Obart03g33260.1	No_id	Oglab03g31670.1	Oglab03g31660.1	No_id	Opunc03g36240.1	Opunc03g30460.1	No_id	No_id	No_id	No_id	Lperr01g30100.1	Lperr03g27810.1	0	0	0	0	0	0	0	0	0	0	0	0	0	0	0.420451	21.306	53.2958	39.5004	0	0	0	0	0	0	0	0	0	0	0	0	0	0
Osjap03g36400.1	Osjap03g04690.1	Osjap01g12980.2	Obart03g33760.1	Obart03g04650.1	Obart01g34520.1	Oglab03g32170.1	No_id	No_id	Opunc03g30920.1	No_id	No_id	No_id	No_id	No_id	No_id	Lperr01g29830.2	Lperr03g28250.1	0	0	0	1.68828	77.616	7.44723	46.3583	575.585	275.615	0	0	163.064	0	9.91262	13.0617	274.403	11.2643	102.81	0	0	0	0	0	0	0	0	0	0	0	0	0	0
Osjap03g39550.1	No_id	No_id	No_id	Obart04g26380.4	Obart03g36630.1	No_id	Oglab03g34930.1	Oglab03g34920.1	No_id	Opunc04g23380.6	Opunc03g33620.1	Obrac03g27240.1	No_id	No_id	No_id	No_id	No_id	0	0	0	0	0	0	0	0	0	0	0	0	9.1583	11.3814	9.21537	15.455	24.0959	29.3526	0	0	0	0	0	0	0	0	0	0	0	0	0	0
Osjap03g40400.1	Osjap07g05740.1	Osjap07g05830.1	No_id	Obart07g05050.1	Obart03g37340.1	No_id	Oglab07g04940.1	Oglab07g04840.1	Opunc03g34420.1	Opunc07g04870.1	Opunc07g04960.1	No_id	Obrac07g03140.1	Obrac03g27810.1	No_id	Lperr03g31580.1	Lperr03g31590.1	0	0	0	1.57207	0.678481	6.19129	43.4747	85.118	203.323	0	0	0	2.283	5.18202	4.99831	417.46	276.661	428.31	0	0	0	0	0	0	0	0	0	0	0	0	2.66321	10.0444
Osjap03g44070.1	Osjap03g44260.1	Osjap05g21490.1	No_id	Obart03g40680.1	Obart03g40860.1	No_id	Oglab03g38820.1	Oglab03g38640.1	Opunc03g37840.1	Opunc12g13740.1	Opunc06g00320.1	No_id	No_id	No_id	No_id	Lperr01g38560.1	Lperr08g09550.1	0	0	0.207832	0	0	0	0	0	0.176409	0	0	0	0	0	0	17.4125	56.7939	22.7773	0	0	0	0	0	0	0	0	0	0	0	0	0	0
Osjap03g44320.1	Osjap04g33070.2	Osjap05g18460.1	No_id	Obart06g20790.1	Obart04g28950.3	No_id	Oglab04g26980.1	Oglab06g18840.1	No_id	Opunc05g14360.1	Opunc04g26460.2	No_id	Obrac06g08740.1	Obrac04g20350.1	No_id	Lperr04g24470.1	Lperr06g10840.1	1.70038	2.37772	2.77626	0	0	0	0	2.22877	0.466728	0	0	0	1.14747	4.89718	19.9795	28.1658	10.4845	6.41206	0	0	0	0	0	0	0	0	0	0	0	0	0	0
Osjap03g44530.1	No_id	No_id	No_id	Obart03g41030.1	Obart03g41020.1	No_id	Oglab03g38980.1	Oglab03g38990.1	No_id	Opunc07g06610.1	Opunc03g38110.1	Obrac03g30850.1	No_id	No_id	No_id	Lperr07g06010.1	Lperr03g34950.2	0	1.48191	0.441229	0	0	0	0	0	0	0	0	0	0	2.13245	1.42454	14.9306	13.3848	17.0107	0	0	0	0	0	0	0	0	0	0	0	0	20.3916	9.10639
Osjap04g02830.1	Osjap04g02720.1	Osjap04g02730.1	No_id	Obart04g01960.1	Obart10g04670.1	No_id	No_id	No_id	No_id	Opunc04g02050.1	Opunc04g01960.1	No_id	No_id	No_id	No_id	No_id	No_id	0	0	1.34561	0	0	0	0	0.129936	0	0	0	0	0	1.10709	0	3.20575	3.09569	8.55668	0	0	0	0	0	0	0	0	0	0	0	0	0	0
Osjap04g11160.1	Osjap10g21270.2	Osjap11g14300.1	No_id	Obart04g08610.1	Obart11g12300.1	No_id	Oglab11g10800.1	Oglab09g05260.1	Opunc04g07220.1	Opunc10g16660.1	Opunc11g10540.3	No_id	Obrac10g11900.3	Obrac04g04850.1	Lperr04g05910.1	Lperr10g14190.1	Lperr11g10010.2	0	1.44331	5.10156	0	0.534992	3.88803	0	6.40825	3.43468	0	0	0	0	1.40826	0.74762	0	4.98374	2.48871	0	0	0	0	0	0	0	0	0	0	0	0	0	0
Osjap04g13840.6	No_id	No_id	No_id	Obart04g11170.3	Obart04g11160.1	No_id	Oglab04g09430.1	Oglab04g09440.2	No_id	Opunc04g09110.3	Opunc04g09100.1	No_id	Obrac04g05970.2	Obrac04g05960.1	No_id	Lperr09g16480.1	Lperr04g07860.1	1.71048	1.60237	2.41244	0	0	0	0	0	0	0	0	0	4.32217	7.76897	2.03673	1.71014	20.0688	427.618	0	0	0	0	0	0	0	0	0	0	0	0	9.58855	0
Osjap04g19980.2	No_id	No_id	No_id	Obart04g16660.1	Obart04g16670.1	No_id	Oglab04g14990.1	Oglab04g14980.1	No_id	Opunc01g42400.1	Opunc04g14460.1	No_id	Obrac04g10330.1	Obrac08g01810.1	No_id	Lperr11g13180.1	Lperr04g13310.1	2.36006	2.18589	5.07732	0	0	0	0	0	0	0	0	0	0	0	0.700467	4.61853	7.06981	4.69524	0	0	0	0	0	0	0	0	0	0	0	0	0	0
Osjap04g27970.1	Osjap02g33010.1	Osjap02g40270.1	No_id	Obart04g23990.1	Obart04g23980.1	No_id	Oglab04g22120.1	Oglab04g22130.1	No_id	Opunc04g21530.1	Opunc04g21520.1	No_id	Obrac04g16300.1	Obrac04g16310.1	Lperr04g19670.1	Lperr02g23670.1	Lperr02g29790.1	0	0	0	0	11.6494	1.01132	25.7047	6.43867	0	0	0	0	0	3.33819	3.42112	0	3.78235	5.046	0	0	0	0	0	0	0	0	0	0	0	0	0	0
Osjap04g30120.1	Osjap05g24420.1	Osjap04g16240.1	Obart04g26710.2	Obart05g21760.1	Obart12g15260.1	No_id	Oglab06g14840.1	Oglab11g19190.1	No_id	Opunc05g09290.1	Opunc04g23700.2	Obrac04g18040.3	No_id	No_id	No_id	Lperr10g10450.1	Lperr07g00250.2	0	0	1.3785	0	0	0	0	0.20802	0.141671	0	0	0.886355	0	0	0	0	1.48263	0.301692	0	0	0	0	0	0	2.0062	0	3.00878	0	0	0	0	0
Osjap04g30680.1	No_id	No_id	No_id	Obart04g25110.1	Obart04g25100.1	No_id	Oglab04g23200.1	Oglab04g23190.1	No_id	Opunc04g24230.1	Opunc04g24220.1	No_id	Obrac04g18410.1	Obrac04g18400.1	No_id	Lperr04g22410.1	Lperr04g22400.1	0	0	0	0	0	0	0	0	0	0	0	0	3.43764	5.12137	7.65629	5.67267	8.97427	7.65629	0	0	0	0	0	0	0	0	0	0	0	0	4.54137	6.33925
Osjap04g30680.2	No_id	No_id	No_id	Obart04g25110.1	Obart04g25100.1	No_id	Oglab04g23200.1	Oglab04g23190.1	No_id	Opunc04g24230.1	Opunc04g24220.1	No_id	Obrac04g18410.1	Obrac04g18400.1	No_id	Lperr04g22410.1	Lperr04g22400.1	0	0	0	0	0	0	0	0	0	0	0	0	3.43764	5.12137	7.65629	5.67267	8.97427	7.65629	0	0	0	0	0	0	0	0	0	0	0	0	4.54137	6.33925
Osjap04g34120.1	No_id	No_id	No_id	Obart04g30010.1	Obart04g30020.1	No_id	Oglab04g28050.2	Oglab04g28060.1	No_id	Opunc04g27490.1	Opunc04g26880.2	No_id	Obrac04g21200.1	Obrac04g20700.2	No_id	Lperr04g25470.1	Lperr04g24800.2	5.89157	8.51236	21.5934	0	0	0	0	0	0	0	0	0	6.57404	14.3807	0	19.4705	50.0287	31.4539	0	0	0	0	0	0	0	0	0	0	0	0	0	0
Osjap04g35010.1	Osjap03g18110.1	Osjap08g00940.1	No_id	Obart06g16190.1	Obart04g30900.1	No_id	Oglab08g09550.1	Oglab08g00300.1	No_id	Opunc02g17940.1	Opunc08g00870.1	No_id	Obrac11g05680.1	Obrac08g00850.1	No_id	No_id	No_id	0	0	0	0	0	0	2.1788	14.536	8.27065	0	0	0	0	0	0	5.70287	14.3316	9.09543	0	0	0	1.11885	0	3.23016	1.5125	0	4.87154	0	0	0	0	0
Osjap05g00220.1	No_id	No_id	No_id	Obart05g00180.1	Obart05g00190.1	No_id	Oglab05g00180.1	Oglab05g00170.1	No_id	Opunc05g00160.1	Opunc05g00170.1	No_id	Obrac05g00210.1	Obrac01g00170.1	No_id	Lperr05g00200.1	Lperr05g00210.2	0	0	21.7281	0	0	0	0	0	0	0	0	0	0	0	11.8946	6.77675	37.2504	11.8946	0	0	0	0	0	14.6629	0	0	14.6629	0	0	0	0	0
Osjap05g00530.1	Osjap02g42390.1	Osjap07g27300.1	Obart05g00520.2	Obart06g01490.1	Obart09g15270.1	No_id	Oglab05g00490.2	Oglab05g00500.1	No_id	Opunc05g00490.1	Opunc05g00480.1	No_id	No_id	No_id	No_id	Lperr04g17270.1	Lperr07g20540.1	0	0	0	0	0	0	1.52548	61.4448	0.552319	0	0	0	2.91034	3.14738	2.37668	6.7288	12.1706	5.8396	0	0	0	1.10354	0	6.37814	1.10354	4.9337	6.37814	0	0	0	0	0
Osjap05g00530.2	Osjap09g15690.3	Osjap07g27300.1	Obart05g00520.2	Obart06g01490.1	Obart09g15270.1	No_id	Oglab09g13820.1	Oglab05g00500.1	No_id	Opunc05g00490.1	Opunc02g35220.2	No_id	No_id	No_id	No_id	Lperr05g00500.1	Lperr07g20540.1	0	0	0	2.25694	1.60876	3.57679	1.52548	61.4448	0.552319	0	0	0	2.91034	3.14738	2.37668	6.7288	12.1706	5.8396	0	0	0	0	0	0	1.10354	4.9337	6.37814	0	0	0	0	0
Osjap05g00530.3	Osjap09g15690.3	Osjap07g27300.1	Obart05g00520.2	Obart06g01490.1	Obart09g15270.1	No_id	Oglab09g13820.1	Oglab05g00500.1	No_id	Opunc05g00490.1	Opunc02g35220.2	No_id	No_id	No_id	No_id	Lperr05g00500.1	Lperr07g20540.1	0	0	0	2.25694	1.60876	3.57679	1.52548	61.4448	0.552319	0	0	0	2.91034	3.14738	2.37668	6.7288	12.1706	5.8396	0	0	0	0	0	0	1.10354	4.9337	6.37814	0	0	0	0	0
Osjap05g00530.4	Osjap09g15690.3	Osjap07g27300.1	Obart05g00520.2	Obart02g34000.1	Obart09g15270.1	No_id	Oglab05g00490.2	Oglab05g00500.1	No_id	Opunc05g00490.1	Opunc05g00480.1	No_id	No_id	No_id	No_id	Lperr04g17270.1	Lperr07g20540.1	0	0	0	2.25694	1.60876	3.57679	1.52548	61.4448	0.552319	0	0	0	0	0	4.78667	6.7288	12.1706	5.8396	0	0	0	1.10354	0	6.37814	1.10354	4.9337	6.37814	0	0	0	0	0
Osjap05g02530.1	Osjap06g18010.1	Osjap03g00960.1	Obart05g02340.1	Obart06g15630.1	Obart03g00820.2	Oglab05g02190.1	Oglab03g00660.1	Oglab05g07310.1	No_id	Opunc05g02220.2	Opunc07g20770.2	No_id	Obrac05g01840.1	Obrac06g15870.1	No_id	No_id	No_id	0	0	5.14726	0	0	0	0	0	6.06329	5.34528	11.4745	5.19911	0	0	0.173889	7.24906	10.0984	7.99109	0	0	0	0	0	0	0	0	0	0	0	0	2.341	4.40391
Osjap05g04120.1	Osjap01g27410.1	Osjap03g15140.5	Obart05g03830.2	Obart01g23310.1	Obart03g14050.1	Oglab05g03490.1	Oglab03g14060.1	Oglab01g19490.1	Opunc05g03540.2	Opunc01g23460.1	Opunc03g13590.1	Obrac05g02930.1	Obrac01g17590.1	Obrac03g11330.1	No_id	No_id	No_id	3.8479	12.6196	8.95357	2.79264	14.5214	30.4019	6.61234	39.1084	24.5383	18.1835	22.9027	6.37085	0	4.10982	5.56081	19.7225	51.701	23.3393	0	0	0	0	0	0	2.4878	0	7.32192	0	29.4833	0	0	0
Osjap05g04120.2	Osjap01g27410.1	Osjap03g15140.5	Obart05g03830.2	Obart01g23310.1	Obart03g14050.1	Oglab05g03490.1	Oglab03g14060.1	Oglab01g19490.1	Opunc05g03540.2	Opunc01g23460.1	Opunc03g13590.1	Obrac05g02930.1	Obrac01g17590.1	Obrac03g11330.1	No_id	No_id	No_id	3.8479	12.6196	8.95357	2.79264	14.5214	30.4019	6.61234	39.1084	24.5383	18.1835	22.9027	6.37085	0	4.10982	5.56081	19.7225	51.701	23.3393	0	0	0	0	0	0	2.4878	0	7.32192	0	29.4833	0	0	0
Osjap05g14570.1	Osjap05g14540.1	Osjap01g31830.1	No_id	Obart05g12690.1	Obart02g30540.1	No_id	Oglab05g11780.1	Oglab02g28070.1	Opunc05g10890.1	Opunc05g11350.1	Opunc04g20130.1	No_id	No_id	No_id	No_id	No_id	No_id	0	0	0.391726	0	0	0	0	0	0	0	0	0	0	0	0	0	0	0	0	0	0	0	0	0	0	0	0	0	0	0	0	0
Osjap05g20040.1	No_id	No_id	No_id	Obart05g17650.1	Obart05g17640.1	No_id	Oglab05g16560.1	Oglab05g16550.1	No_id	Opunc05g15560.3	Opunc05g15550.1	No_id	Obrac05g11820.1	Obrac05g11810.1	No_id	Lperr08g00390.1	Lperr05g14030.1	0	48.2227	61.1983	0	0	0	0	0	0	0	0	0	12.4463	13.5045	14.1713	36.8124	56.3015	60.3875	0	0	0	0	0	0	1.04176	0	0	0	0	0	6.41536	6.00144
Osjap05g23780.1	Osjap01g39920.1	Osjap06g31930.1	No_id	Obart01g34670.1	Obart06g27420.1	No_id	Oglab05g19900.1	Oglab05g19890.1	No_id	Opunc05g18780.1	Opunc05g18790.1	No_id	Obrac01g26700.1	Obrac05g14330.1	Lperr05g16920.2	Lperr01g29930.1	Lperr06g22970.1	0	0	0	0	1.3226	1.10423	3.65552	9.64083	7.05776	0	0	0	0	7.21473	2.27756	8.06298	9.96327	7.76025	0	0	0	0	0	0	0	0	0	0	0	0	0	0
Osjap05g26770.1	No_id	No_id	No_id	Obart05g23830.1	Obart01g29160.1	No_id	Oglab01g24720.1	Oglab01g24730.1	No_id	Opunc05g21250.2	Opunc05g21240.1	No_id	Obrac05g16520.1	Obrac01g16370.1	No_id	Lperr05g19670.1	Lperr01g24980.1	0	0	0	0	0	0	0	0	0	0	0	0	3.47695	21.0115	38.9095	44.7348	89.2392	178.631	0	0	0	0	0	0	18.2638	0	173.202	0	0	0	8.9408	19.6647
Osjap05g28230.1	Osjap01g31150.1	Osjap01g31140.1	Obart05g25070.1	Obart01g26880.1	Obart01g26870.1	Oglab05g23160.1	Oglab01g22750.1	Oglab01g22740.1	Opunc05g22640.1	Opunc01g26830.1	Opunc01g26820.1	No_id	Obrac05g17560.2	Obrac01g20400.1	Lperr01g22990.1	Lperr05g20850.2	Lperr05g20860.1	0	0	0	0	3.55341	0.630841	15.8785	213.906	307.1	0	0	0	0	2.31872	1.63298	0	172.909	0	0	0	0	0	0	0.68865	27.1441	0	255.985	0	0	0	0	0
Osjap05g28940.1	No_id	No_id	No_id	Obart05g25720.1	Obart01g26130.1	No_id	Oglab05g23750.1	Oglab05g23760.1	No_id	Opunc05g23330.1	Opunc05g23320.1	No_id	Obrac05g18140.1	Obrac05g18130.1	No_id	Lperr05g21370.1	Lperr01g22340.3	0	0	0	0	0	0	0	0	0	0	0	0	4.20524	5.75237	15.3758	0	19.8766	11.4146	0	0	0	0	0	0	9.17615	34.9682	34.4079	0	0	0	0	3.72767
Osjap05g28940.2	No_id	No_id	No_id	Obart05g25720.1	Obart01g26130.1	No_id	Oglab05g23750.1	Oglab05g23760.1	No_id	Opunc05g23330.1	Opunc01g26010.1	No_id	Obrac05g18140.1	Obrac05g18130.1	No_id	Lperr05g21370.1	Lperr01g22340.3	0	0	0	0	0	0	0	0	0	0	0	0	4.20524	5.75237	15.3758	0	19.8766	11.4146	0	0	0	0	0	0	9.17615	34.9682	34.4079	0	0	0	0	3.72767
Osjap05g28940.3	No_id	No_id	No_id	Obart05g25720.1	Obart01g26130.1	No_id	Oglab05g23750.1	Oglab05g23760.1	No_id	Opunc05g23330.1	Opunc05g23320.1	No_id	Obrac05g18140.1	Obrac05g18130.1	No_id	Lperr05g21370.1	Lperr01g22340.3	0	0	0	0	0	0	0	0	0	0	0	0	4.20524	5.75237	15.3758	0	19.8766	11.4146	0	0	0	0	0	0	9.17615	34.9682	34.4079	0	0	0	0	3.72767
Osjap05g29140.1	No_id	No_id	No_id	Obart05g25940.1	Obart05g25950.1	No_id	Oglab05g23960.1	Oglab05g23970.1	No_id	Opunc01g25660.1	Opunc05g23520.1	No_id	Obrac05g18290.1	Obrac01g19470.3	Lperr05g21550.1	No_id	No_id	0	0	0	0	0	0	0	0	0	0	0	0	0	2.26447	1.23494	19.0208	38.8463	30.0218	0	0	0	3.00359	0	26.6652	3.00359	0	26.6652	0	0	0	0	0
Osjap05g29150.1	No_id	No_id	No_id	Obart05g25970.1	Obart05g25960.1	No_id	Oglab05g23980.1	Oglab01g25570.1	No_id	Opunc05g23540.1	Opunc05g23530.1	No_id	Obrac06g07360.6	Obrac05g18300.1	No_id	Lperr05g21570.1	Lperr05g21560.1	0	1.59619	21.6177	0	0	0	0	0	0	0	0	0	0	8.48227	3.66842	55.475	21.6789	36.3354	0	0	0	3.00359	0	26.6652	15.8559	0	54.4116	0	0	0	0	13.9681
Osjap05g30140.4	No_id	No_id	No_id	Obart05g26820.1	Obart05g26830.1	No_id	Oglab05g24830.1	Oglab01g20290.1	No_id	Opunc01g24270.1	Opunc05g24450.1	No_id	Obrac04g18520.1	Obrac06g19100.1	No_id	Lperr01g10070.1	Lperr05g22520.1	0	0	5.80623	0	0	0	0	0	0	0	0	0	0	0	0	0	0	7.79314	0	0	0	0	0	0	0	0	0	0	0	0	0	0
Osjap05g30140.5	No_id	No_id	No_id	Obart05g26820.1	Obart05g26830.1	No_id	Oglab05g24830.1	Oglab01g20290.1	No_id	Opunc01g24270.1	Opunc05g24450.1	No_id	Obrac04g18520.1	Obrac06g19100.1	No_id	Lperr01g20770.1	Lperr05g22520.1	0	0	5.80623	0	0	0	0	0	0	0	0	0	0	0	0	0	0	7.79314	0	0	0	0	0	0	0	0	0	0	0	0	0	0
Osjap06g00390.1	Osjap07g16770.1	Osjap06g28340.1	No_id	Obart06g00340.1	Obart06g00350.1	No_id	Oglab06g00370.1	Oglab06g00360.1	No_id	Opunc06g00310.1	Opunc06g00330.1	No_id	Obrac06g00310.2	Obrac06g16850.1	No_id	Lperr06g00340.1	Lperr06g20160.1	0	0	7.01015	0	0	0	6.68323	12.0144	9.42688	0	0	0	0	1.75526	3.90183	15.0521	10.7221	10.792	0	0	0	0	0	0	0	0	0	0	0	0	0	4.49147
Osjap06g00940.1	Osjap08g13790.1	Osjap06g00950.1	Obart06g00880.1	Obart08g12830.1	Obart06g00690.1	Oglab06g00840.1	Oglab07g02750.1	Oglab06g00730.1	No_id	Opunc06g00830.1	Opunc06g00800.1	No_id	Obrac06g00660.1	Obrac02g00120.1	No_id	Lperr01g05300.1	Lperr06g00740.1	0	0	0	0	0	0	0	1.2085	4.99049	0	0	0	0	0	0	0	0	1.8579	0	0	0	0	0	0	0.240718	0	0.482717	0	0	0	0	0
Osjap06g03080.1	Osjap01g37620.1	Osjap04g34350.1	Obart06g02710.1	Obart02g30110.1	Obart04g30240.1	Oglab06g02870.1	Oglab04g28300.1	Oglab02g27640.1	No_id	Opunc04g27750.1	Opunc07g23960.4	No_id	Obrac04g21390.1	Obrac06g14370.1	No_id	Lperr04g03130.1	Lperr12g00960.1	0	0	0	0	0	0	4.85905	16.5513	20.1319	16.5706	15.5681	12.6004	9.44443	20.3285	0	16.0735	23.7151	24.5912	0	0	0	0	0	0	0	0	0	0	0	0	17.3972	18.9254
Osjap06g03630.2	No_id	No_id	No_id	Obart06g03220.3	Obart06g03200.1	No_id	Oglab06g03380.2	Oglab06g03360.1	Opunc06g03070.4	Opunc06g03070.3	Opunc06g03090.1	No_id	Obrac06g02320.1	Obrac06g02310.1	No_id	Lperr06g02930.2	Lperr06g02900.2	0	0	4.58222	0	0	0	0	0	0	0	0	0	0	0	0	0	0	33.298	0	0	0	0	0	0	0	0	0	0	0	56.8151	0	0
Osjap06g07420.1	No_id	No_id	No_id	Obart06g06510.1	Obart07g22790.1	No_id	Oglab02g31950.1	Oglab07g19610.1	No_id	Opunc07g21390.1	Opunc02g31990.2	No_id	Obrac06g05010.3	Obrac02g25370.1	Lperr06g06040.3	Lperr02g28510.3	Lperr02g28500.3	0	0	0	0	0	0	0	0	0	0	0	0	1.77887	5.03631	40.7444	13.582	21.7118	17.9467	0	0	0	0	0	0	1.08139	0	5.21997	0	0	0	0	0
Osjap06g08210.1	Osjap09g13400.1	Osjap02g37570.1	No_id	No_id	No_id	No_id	Oglab06g07110.1	Oglab09g11950.1	No_id	Opunc09g11410.1	Opunc06g06900.1	No_id	No_id	No_id	No_id	No_id	No_id	3.32884	5.50858	7.02301	0	0	0	3.61319	22.7034	9.89946	0	0	0	0	0	0	0	0	0	0	0	0	0	0	0	1.71706	0	0	0	0	0	0	4.67787
Osjap06g14300.1	No_id	No_id	No_id	Obart06g12460.1	Obart03g20360.1	No_id	Oglab04g17080.1	Oglab03g20030.1	No_id	Opunc06g11860.1	Opunc03g19140.1	No_id	Obrac06g08830.1	Obrac03g16170.1	No_id	Lperr06g10930.1	Lperr03g17390.1	0	0.228058	0.496985	0	0	0	0	0	0	0	0	0	0	1.00092	0.440811	3.51517	23.8382	3.37448	0	0	0	0	0	0	0	0	0	0	0	0	0	0
Osjap06g27840.1	No_id	No_id	No_id	Obart06g13090.1	Obart06g23260.1	No_id	Oglab03g01520.1	Oglab04g06370.1	No_id	No_id	No_id	No_id	No_id	No_id	No_id	No_id	No_id	0	0	839.359	0	0	0	0	0	0	0	0	0	0	0	0	0	0	156.875	0	0	0	0	0	0	5.00642	6.40008	4.95444	0	0	0	0	0
Osjap06g31140.1	No_id	No_id	No_id	Obart06g26690.1	Obart06g26680.2	No_id	Oglab06g24120.2	Oglab06g24130.1	No_id	Opunc06g24410.1	Opunc06g24400.1	No_id	Obrac06g18880.2	Obrac06g18890.1	No_id	Lperr06g22280.2	Lperr06g22290.1	0	0	90.2514	0	0	0	0	0	0	0	0	0	29.0078	1.97772	4.39798	55.4627	32.0029	25.1912	0	0	0	0	0	0	4.20963	0	0	0	0	0	71.7055	5.38078
Osjap06g33090.1	No_id	No_id	No_id	Obart06g28310.2	Obart06g28300.1	No_id	No_id	No_id	No_id	Opunc06g25840.1	Opunc06g25830.1	No_id	Obrac02g27960.1	Obrac01g18960.1	No_id	No_id	No_id	3.63027	0	0	0	0	0	0	0	0	0	0	0	5.34974	6.22478	0	0	26.5705	13.6182	0	0	0	0	0	0	0	0	0	0	0	0	15.9883	2.4205
Osjap07g02600.5	Osjap07g02840.1	Osjap01g07190.1	No_id	Obart01g06210.1	Obart07g02450.1	No_id	Oglab07g02390.2	Oglab01g05790.1	No_id	Opunc01g05980.1	Opunc07g02500.8	No_id	Obrac07g01520.1	Obrac05g04770.1	No_id	Lperr07g02310.1	Lperr11g02330.1	0	0	0	2.28254	1.15866	1.63435	2.26186	1.49852	10.5256	0	0	0	0	4.19552	5.18729	4.47534	4.21559	1.75016	0	0	0	0	0	0	1.16893	0	14.0074	0	0	0	3.74336	0
Osjap07g04240.1	Osjap04g16300.1	Osjap12g10970.1	No_id	Obart05g11940.1	Obart07g03860.1	No_id	Oglab07g03710.1	Oglab06g10580.1	No_id	Opunc12g18050.2	Opunc07g03760.1	No_id	No_id	No_id	No_id	Lperr05g15860.1	Lperr07g03350.1	11.424	15.8249	22.8841	0	0	0	0	0	0	0	0	0	0	0	0	13.2781	14.0414	13.4515	0	0	0	0	0	3.17762	3.48426	31.6297	17.153	0	0	0	0	0
Osjap07g06350.1	Osjap08g03480.1	Osjap07g09830.1	No_id	Obart09g03030.1	Obart07g08500.1	No_id	Oglab04g03880.1	Oglab07g08200.1	No_id	Opunc07g05240.1	Opunc06g23810.1	No_id	Obrac07g03880.2	Obrac07g03440.1	No_id	Lperr08g03240.1	Lperr07g04680.1	0	0	0	0	0	0	0	0.297771	3.04055	0	0	0	0	1.59908	0.491355	1.4844	3.06881	3.85899	0	0	0	0	0	0	0	0	0	0	0	0	0	0
Osjap07g11390.1	No_id	No_id	No_id	Obart03g24150.1	Obart07g09900.1	No_id	Oglab07g09550.1	Oglab07g09530.1	No_id	Opunc05g18930.2	Opunc07g09130.1	No_id	Obrac03g18620.1	Obrac07g05900.2	No_id	No_id	No_id	0	1.0506	0.8762	0	0	0	0	0	0	0	0	0	0	0	0	0	0	0.85847	0	0	0	0	0	0	0	0	0	0	0	0	0	0
Osjap07g11390.2	No_id	No_id	No_id	Obart03g24150.1	Obart07g09900.1	No_id	Oglab07g09550.1	Oglab07g09530.1	No_id	Opunc05g18930.2	Opunc07g09130.1	No_id	No_id	No_id	No_id	No_id	No_id	0	1.0506	0.8762	0	0	0	0	0	0	0	0	0	0	0	0	0	0	0.85847	0	0	0	0	0	0	0	0	0	0	0	0	0	0
Osjap07g22430.1	No_id	No_id	Obart07g19310.1	Obart04g26170.2	Obart07g19310.2	No_id	Oglab04g15310.1	Oglab12g04490.5	No_id	Opunc03g01390.1	Opunc07g18240.1	No_id	Obrac03g26550.1	Obrac07g12120.1	No_id	Lperr07g01300.1	Lperr07g16720.1	24.5405	2.29635	48.4457	0	0	0	0	0	0	33.7332	13.9063	21.7799	0	0	0	33.7332	13.9063	21.7799	0	0	0	0	0	0	1.35317	0	5.12341	0	0	0	7.51467	18.9274
Osjap07g25530.1	No_id	No_id	No_id	Obart07g21920.1	Obart03g05770.1	No_id	Oglab07g18760.1	Oglab07g18770.1	No_id	No_id	No_id	No_id	No_id	No_id	No_id	No_id	No_id	0	0	1.70825	0	0	0	0	0	0	0	0	0	0	0	1.34494	23.7264	12.4783	41.7319	0	0	0	0	0	0	0	0	0	0	0	0	0	0
Osjap07g25960.2	No_id	No_id	No_id	Obart07g22400.3	Obart07g22390.1	No_id	Oglab07g19210.1	Oglab03g20050.1	No_id	Opunc03g19170.1	Opunc07g21000.2	No_id	No_id	No_id	No_id	Lperr07g19400.1	Lperr03g17430.1	0	0	0	0	0	0	0	0	0	0	0	0	0.963962	45.482	4.48891	13.5903	50.4333	38.4207	0	0	0	0	0	0	0	0	0	0	0	0	7.04526	9.54816
Osjap07g25960.3	No_id	No_id	No_id	Obart07g22400.3	Obart07g22390.1	No_id	Oglab07g19210.1	Oglab03g20050.1	No_id	Opunc03g19170.1	Opunc07g21000.2	No_id	No_id	No_id	No_id	Lperr07g19400.1	Lperr03g17430.1	0	0	0	0	0	0	0	0	0	0	0	0	0.963962	45.482	4.48891	13.5903	50.4333	38.4207	0	0	0	0	0	0	0	0	0	0	0	0	7.04526	9.54816
Osjap07g28390.1	No_id	No_id	No_id	Obart07g24510.2	Obart04g16460.1	No_id	Oglab04g14790.1	Oglab07g21200.1	No_id	Opunc07g23200.1	Opunc04g14330.1	No_id	No_id	No_id	No_id	No_id	No_id	0	1.34516	0	0	0	0	0	0	0	0	0	0	0	0	0	1.8789	5.71114	3.07487	0	0	0	0	0	0	0	0	0	0	0	0	0	0
Osjap07g29350.1	Osjap07g29380.2	Osjap03g18810.1	No_id	Obart06g20980.1	Obart07g25530.1	No_id	Oglab06g19010.1	Oglab07g22020.1	No_id	Opunc07g23940.1	Opunc07g23960.1	No_id	Obrac06g14370.1	Obrac07g16760.2	No_id	Lperr11g01590.1	Lperr07g22320.1	0	0	0	0	48.3275	0	130.498	192.851	542.004	0	0	0	0	0	0	62.8177	95.1112	287.148	0	0	0	0	0	0	0.417597	0	4.85388	0	0	0	16.0593	53.8454
Osjap08g04940.1	No_id	No_id	No_id	Obart08g04630.1	Obart04g14760.1	No_id	Oglab08g04140.1	Oglab08g04220.1	Opunc08g04470.1	Opunc08g04480.1	Opunc08g04400.1	No_id	Obrac11g12090.1	Obrac04g08790.1	No_id	Lperr08g04480.1	Lperr08g04410.1	0	0.719979	0.579152	0	0	0	0	0	0	0	0	0	0	0	0	21.996	36.4034	6.10948	0	0	0	0	0	0	0	0	0	0	0	0.34804	0	0
Osjap08g04940.2	No_id	No_id	No_id	Obart08g04630.1	Obart04g14760.1	No_id	Oglab08g04140.1	Oglab08g04220.1	Opunc08g04470.1	Opunc08g04480.1	Opunc08g04400.1	No_id	Obrac11g12090.1	Obrac04g08790.1	No_id	Lperr08g04480.1	Lperr08g04410.1	0	0.719979	0.579152	0	0	0	0	0	0	0	0	0	0	0	0	21.996	36.4034	6.10948	0	0	0	0	0	0	0	0	0	0	0	0.34804	0	0
Osjap08g04940.3	No_id	No_id	No_id	Obart08g04630.1	Obart04g14760.1	No_id	Oglab08g04140.1	Oglab08g04220.1	Opunc08g04470.1	Opunc08g04480.1	Opunc08g04400.1	No_id	Obrac11g12090.1	Obrac04g08790.1	No_id	Lperr08g04480.1	Lperr08g04410.1	0	0.719979	0.579152	0	0	0	0	0	0	0	0	0	0	0	0	21.996	36.4034	6.10948	0	0	0	0	0	0	0	0	0	0	0	0.34804	0	0
Osjap08g04940.4	No_id	No_id	No_id	Obart08g04630.1	Obart04g14760.1	No_id	Oglab08g04140.1	Oglab08g04220.1	Opunc08g04470.1	Opunc08g04480.1	Opunc08g04400.1	No_id	Obrac11g12090.1	Obrac04g08790.1	No_id	Lperr08g04480.1	Lperr08g04410.1	0	0.719979	0.579152	0	0	0	0	0	0	0	0	0	0	0	0	21.996	36.4034	6.10948	0	0	0	0	0	0	0	0	0	0	0	0.34804	0	0
Osjap08g04940.5	No_id	No_id	No_id	Obart08g04630.1	Obart08g04530.1	No_id	Oglab08g04140.1	Oglab08g04220.1	Opunc08g04470.1	Opunc08g04480.1	Opunc08g04400.1	No_id	No_id	No_id	No_id	Lperr08g04480.1	Lperr08g04410.1	0	0	0	0	0	0	0	0	0	0	0	0	0	0	0	8.02525	29.6338	9.6939	0	0	0	0	0	0	0	0	0	0	0	0.34804	0	0
Osjap08g04940.7	No_id	No_id	No_id	Obart08g04630.1	Obart04g14760.1	No_id	Oglab08g04140.1	Oglab08g04220.1	Opunc08g04470.1	Opunc08g04480.1	Opunc08g04400.1	No_id	No_id	No_id	No_id	Lperr08g04480.1	Lperr08g04410.1	0	0	0	0	0	0	0	0	0	0	0	0	0	0	0	21.996	36.4034	6.10948	0	0	0	0	0	0	0	0	0	0	0	0.34804	0	0
Osjap08g06650.1	Osjap09g20870.1	Osjap04g21220.1	Obart08g06070.1	Obart02g28440.1	Obart04g17770.1	Oglab08g05640.1	Oglab02g26360.1	Oglab04g16180.1	Opunc08g05850.1	Opunc04g18740.1	Opunc04g15550.1	No_id	Obrac08g04780.1	Obrac08g04800.1	No_id	Lperr08g05690.1	Lperr08g05700.1	12.1435	69.8698	15.0925	0	99.8493	2.90944	15.1696	46.6906	59.3526	39.0808	65.9913	68.7077	0	0	0	69.6166	50.9041	78.3669	0	0	0	0	0	0	1.38381	0	10.8194	22.9365	0	39.9075	0	0
Osjap08g10540.1	Osjap10g16570.1	Osjap08g10560.1	No_id	Obart02g04890.1	Obart07g11970.1	No_id	Oglab08g09010.1	Oglab02g32050.1	No_id	Opunc08g08990.2	Opunc02g16130.1	No_id	No_id	No_id	No_id	Lperr07g03020.1	Lperr10g01740.2	0	0	0	0	0	0	0	0	0.254332	0	0	0	0	0	0	0.879884	0	2.68352	0	0	0	0	0	0	0	0	0	0	0	0	0	0
Osjap08g13760.3	No_id	No_id	No_id	Obart08g12790.1	Obart08g12780.1	No_id	Oglab08g11860.1	Oglab08g11850.1	No_id	Opunc03g34960.1	Opunc05g25720.1	No_id	Obrac09g02930.1	Obrac03g28290.1	No_id	Lperr03g32080.1	Lperr08g10650.1	0	0	0	0	0	0	0	0	0	0	0	0	16.0469	19.2828	4.78001	16.0469	19.2828	20.5528	0	0	0	0	0	0	0	0	0	0	0	0	18.9198	20.4921
Osjap08g19480.1	No_id	No_id	No_id	Obart08g18360.1	Obart08g18370.1	No_id	Oglab08g17000.1	Oglab08g16980.1	No_id	Opunc08g16280.1	Opunc08g16290.1	No_id	Obrac08g12020.1	Obrac08g12010.1	No_id	Lperr08g15260.1	Lperr08g15270.1	0	4.16147	9.57149	0	0	0	0	0	0	0	0	0	6.54923	13.1306	5.87741	6.07086	11.1398	14.2865	0	0	0	0.36791	12.2409	3.9167	9.49826	41.5847	28.3618	0	0	0	8.16644	5.73603
Osjap08g22730.1	Osjap08g22710.1	Osjap04g34840.1	No_id	Obart08g21280.1	Obart04g30710.1	No_id	No_id	No_id	No_id	Opunc08g19370.1	Opunc04g28230.1	No_id	Obrac04g21850.1	Obrac08g14190.1	No_id	Lperr08g18050.1	Lperr04g26140.1	0	0	0	0	0.650779	1.12603	0	11.1837	4.12902	0	0	0	0.679973	0.627927	0.691927	11.873	5.68276	16.7532	0	0	0	0	0	0	0	0	0	0	0	0	0	0
Osjap09g00070.1	Osjap09g04150.1	Osjap02g38200.1	Obart09g12390.1	Obart09g03960.1	Obart02g34090.1	Oglab09g00090.1	Oglab02g31460.1	Oglab09g03840.1	Opunc09g10830.1	No_id	No_id	No_id	No_id	No_id	No_id	No_id	No_id	0	0.245177	0.404293	0	0	0	2.64202	3.28202	6.96959	5.9247	22.8742	4.37353	0	0	0	4.0742	10.8018	14.3241	5.17679	0	9.1452	0	0	0	0	0	0.330825	9.0377	25.4967	15.4857	0	0
Osjap09g03990.5	Osjap09g14680.2	Osjap05g14220.1	No_id	Obart07g20140.1	Obart09g03930.1	No_id	Oglab09g03780.1	Oglab08g18120.2	No_id	Opunc07g19040.1	Opunc09g03510.2	No_id	Obrac09g02030.2	Obrac07g12720.1	No_id	Lperr07g17470.1	Lperr09g02810.2	0	16.5435	14.6855	0	0	0.817975	15.1176	165.048	9.31958	0	0	0	0	14.5651	9.69446	9.96761	17.9667	9.829	0	0	0	0	0	0	0	0	33.846	0	0	0	0	9.80444
Osjap09g06840.5	No_id	No_id	Obart09g06850.2	Obart09g06770.4	Obart02g37100.1	Oglab09g06250.2	Oglab09g14590.1	Oglab09g06170.1	Opunc09g05880.2	Opunc09g14540.1	Opunc02g34270.1	No_id	No_id	No_id	No_id	Lperr02g30550.1	Lperr03g07450.1	18.1138	51.2018	52.1575	0	0	0	0	0	0	4.70291	9.90166	3.36403	0	0	0	6.60456	4.35373	9.59619	0	0	0	0	0	0	0	0	0	0	8.96219	9.45006	0	0
Osjap09g06840.6	No_id	No_id	Obart09g06850.2	Obart09g06770.4	Obart02g37100.1	Oglab09g06250.1	Oglab09g14590.1	Oglab09g06170.1	Opunc09g05880.2	Opunc09g14540.1	Opunc02g34270.1	No_id	No_id	No_id	No_id	Lperr02g30550.1	Lperr03g07450.1	18.1138	51.2018	52.1575	0	0	0	0	0	0	4.70291	9.90166	3.36403	0	0	0	6.60456	4.35373	9.59619	0	0	0	0	0	0	0	0	0	0	8.96219	9.45006	0	0
Osjap09g06840.7	No_id	No_id	Obart09g06850.2	Obart09g06770.4	Obart02g37100.1	Oglab09g06250.1	Oglab09g14590.1	Oglab09g06170.1	No_id	Opunc09g14540.1	Opunc02g34270.1	No_id	No_id	No_id	No_id	Lperr02g30550.1	Lperr03g07450.1	18.1138	51.2018	52.1575	0	0	0	0	0	0	4.70291	9.90166	3.36403	0	0	0	6.60456	4.35373	9.59619	0	0	0	0	0	0	0	0	0	0	0	0	0	0
Osjap09g06840.8	No_id	No_id	Obart09g06850.2	Obart09g06770.4	Obart02g37100.1	Oglab09g06250.1	Oglab09g06170.1	Oglab09g06150.1	No_id	Opunc03g07900.2	Opunc02g34270.1	No_id	No_id	No_id	No_id	Lperr02g30550.1	Lperr03g07450.1	18.1138	51.2018	52.1575	0	0	0	0	0	0	4.70291	9.90166	3.36403	0	0	0	6.60456	4.35373	9.59619	0	0	0	0	0	0	0	0	0	0	0	0	11.2462	0
Osjap09g15430.2	No_id	No_id	Obart09g14980.2	Obart08g20390.1	Obart02g06180.1	Oglab09g13510.3	Oglab08g19240.1	Oglab12g18680.1	Opunc09g13420.2	Opunc08g18560.1	Opunc04g20190.1	Obrac09g09090.1	Obrac01g09090.1	Obrac02g04550.3	No_id	Lperr04g18350.1	Lperr09g11120.1	1.59242	1.65718	5.6266	0	0	0	0	0	0	2.03784	0	0	1.65985	6.05191	3.87046	63.1997	19.3721	30.5238	0	0	0	0	0	0	0	0	0	0	0	0	2.20762	1.16696
Osjap09g15430.3	No_id	No_id	Obart09g14980.2	Obart08g20390.1	Obart02g06180.1	Oglab09g13510.3	Oglab08g19240.1	Oglab12g18680.1	Opunc09g13420.2	Opunc08g18560.1	Opunc04g20190.1	Obrac09g09090.1	Obrac09g00560.1	Obrac02g04550.3	No_id	Lperr04g18350.1	Lperr09g11120.1	1.59242	1.65718	5.6266	0	0	0	0	0	0	2.03784	0	0	1.65985	6.05191	3.87046	63.1997	19.3721	30.5238	0	0	0	0	0	0	0	0	0	0	0	0	2.20762	1.16696
Osjap09g17720.1	No_id	No_id	No_id	Obart02g06450.1	Obart09g17370.1	No_id	Oglab06g09730.1	Oglab06g20260.1	No_id	Opunc09g15680.1	Opunc08g00450.2	No_id	No_id	No_id	No_id	Lperr06g18550.1	Lperr02g25740.1	0	0	0	0	0	0	0	0	0	0	0	0	0	0	0	2.90821	0	1.32405	0	0	0	0	0	0	1.80313	0	12.3743	0	0	0	0	0
Osjap09g20460.1	Osjap09g20430.1	Osjap02g21530.2	Obart09g19980.2	Obart09g19950.1	Obart04g25370.1	Oglab09g18200.1	Oglab09g18170.1	Oglab02g17850.1	No_id	Opunc09g18280.1	Opunc09g18290.2	No_id	Obrac09g13160.3	Obrac09g13140.3	No_id	Lperr09g15890.1	Lperr09g15920.1	0	3.01482	3.39975	0	0	0	6.10211	5.49226	5.74927	0	5.37319	6.73135	0	0	0.0498951	0	22.9782	2.64324	0	0	0	0	0	0	0	0	0	0	0	0	0	0
Osjap10g04950.1	No_id	No_id	Obart10g18220.1	Obart04g29850.1	Obart02g34980.1	Oglab10g03910.1	Oglab04g27900.1	Oglab02g32260.1	No_id	Opunc02g32260.1	Opunc04g27380.2	No_id	Obrac02g25650.1	Obrac04g21100.1	No_id	Lperr04g25370.2	Lperr02g28770.1	0	0.679028	0.345564	0	0	0	0	0	0	0	7.08223	3.35784	7.78075	8.27471	4.59242	6.68055	9.461	6.39039	0.252138	0	0.853923	0	0	0	0	0	0	0	0	0	5.73764	7.68954
Osjap10g12540.3	No_id	No_id	Obart04g26170.1	Obart02g34980.1	Obart03g11790.2	No_id	Oglab03g11800.1	Oglab02g32260.1	No_id	Opunc02g32260.1	Opunc03g11340.1	No_id	Obrac02g25650.1	Obrac03g09470.2	No_id	Lperr02g28770.1	Lperr03g10490.2	7.41515	4.69643	7.93239	0	0	0	0	0	0	0	0	0	6.68055	9.461	6.39039	7.85378	15.543	26.3401	0	0	0	0	0	0	0	0	0	0	0	0	5.73764	7.68954
Osjap10g12540.4	No_id	No_id	Obart04g26170.1	Obart02g34980.1	Obart03g11790.2	No_id	Oglab03g11800.1	Oglab02g32260.1	No_id	Opunc02g32260.1	Opunc03g11340.1	No_id	Obrac02g25650.1	Obrac03g09470.1	No_id	Lperr02g28770.1	Lperr03g10490.1	7.41515	4.69643	7.93239	0	0	0	0	0	0	0	0	0	6.68055	9.461	6.39039	7.85378	15.543	26.3401	0	0	0	0	0	0	0	0	0	0	0	0	5.73764	7.68954
Osjap10g14600.1	No_id	No_id	Obart10g12400.1	Obart03g12670.1	Obart10g12410.2	Oglab10g11970.1	Oglab10g11980.2	Oglab03g12700.1	Opunc10g10650.1	Opunc12g14410.1	Opunc10g10640.1	No_id	Obrac10g07370.1	Obrac12g10200.1	No_id	Lperr10g09020.1	Lperr03g19720.1	0	0	24.9126	0	0	0	0	0	0	5.04772	0	0	8.14503	13.3425	6.34205	26.0578	13.2975	25.7793	0	0	0	0	0	0	0	0	0	146.037	7.33316	120.15	34.732	0
Osjap10g15240.1	Osjap03g36880.2	Osjap03g03010.1	No_id	Obart10g12910.1	Obart10g12900.2	No_id	Oglab10g12600.4	Oglab10g12610.1	No_id	Opunc10g11280.1	Opunc10g11270.1	No_id	Obrac10g07770.1	Obrac10g07780.1	No_id	Lperr10g09460.1	Lperr10g09470.1	3.4428	0	0	0	1.29	2.48409	1.96053	1.05807	2.01853	0	0	0	0	8.41475	3.49269	10.2714	12.9386	0	0	0	0	0	0	0	0	0	0	0	0	0	7.30869	9.54256
Osjap11g00600.1	Osjap10g06830.2	Osjap08g03600.1	Obart12g00320.1	Obart12g18380.1	Obart08g03340.1	Oglab12g00270.1	No_id	No_id	No_id	Opunc12g00560.1	Opunc08g03130.1	No_id	Obrac08g02840.1	Obrac12g00030.1	No_id	Lperr12g00550.1	Lperr12g00630.2	0	0	0	0	1.13001	2.55132	5.97679	8.64724	8.16853	0	0	0	0	0	0.0857333	4.42768	17.4893	5.19505	0	0	0	0	0	0	0	0	0	0	0	0	0	0
Osjap11g01220.1	Osjap07g30390.1	Osjap03g13100.1	Obart11g01060.1	Obart12g00790.1	Obart03g12120.1	Oglab12g00800.1	Oglab07g22980.1	Oglab03g12120.1	Opunc12g00940.1	Opunc11g00920.1	Opunc03g11680.1	No_id	Obrac03g09720.2	Obrac12g00780.1	No_id	Lperr03g10720.1	Lperr11g00920.1	0	4.38068	3.27487	0	0	0	0	4.70804	0	0	0	10.4761	3.15938	4.10786	4.23679	6.84716	12.0779	10.2992	0	0	0	0	0	0	0	0	0	6.2501	2.78582	0	6.9676	2.5174
Osjap11g01730.2	No_id	No_id	No_id	Obart12g01240.1	Obart12g01250.1	Oglab11g01340.2	Oglab12g01230.1	Oglab11g01330.1	Opunc11g01300.1	Opunc11g01280.1	Opunc11g01300.2	No_id	No_id	No_id	No_id	Lperr11g01230.1	Lperr12g01420.1	0	0	0	0	0	0	0	0	0	0	0	0	0	0	0	7.91523	10.8746	8.33083	0	0	0	0	0	0	2.31403	20.9944	11.2181	0	0	14.3962	0	0
Osjap11g01770.1	No_id	No_id	No_id	Obart11g01710.2	Obart11g12030.1	No_id	Oglab12g01260.1	Oglab11g01510.1	No_id	Opunc12g01360.1	Opunc12g01530.2	No_id	Obrac12g01170.2	Obrac12g01310.1	No_id	Lperr12g01430.1	Lperr12g01570.1	10.0455	2.00547	0	0	0	0	0	0	0	0	0	0	0	0	0	10.1295	8.78566	54.6093	0	0	0	0	0	0	0	0	0	0	0	0	0	0
Osjap11g01770.2	No_id	No_id	No_id	Obart11g01710.2	Obart11g12030.1	No_id	Oglab12g01260.1	Oglab11g01510.1	No_id	Opunc12g01360.1	Opunc12g01520.8	No_id	Obrac12g01170.2	Obrac12g01310.1	No_id	Lperr12g01430.1	Lperr11g01370.1	10.0455	2.00547	0	0	0	0	0	0	0	0	0	0	0	0	0	10.1295	8.78566	54.6093	0	0	0	0	0	0	0	0	0	0	0	0	0	0
Osjap11g01770.3	No_id	No_id	No_id	Obart11g01710.2	Obart12g01280.1	No_id	Oglab12g01260.1	Oglab11g01510.1	No_id	Opunc12g01360.1	Opunc12g01520.8	No_id	Obrac12g01170.2	Obrac12g01310.1	No_id	Lperr12g01430.1	Lperr12g01570.1	10.0455	2.00547	0	0	0	0	0	0	0	0	0	0	0	0	0	0	0	4.52752	0	0	0	0	0	0	0	0	0	0	0	0	0	0
Osjap11g01770.4	No_id	No_id	No_id	Obart11g01710.2	Obart12g01280.1	No_id	Oglab12g01260.1	Oglab11g01510.1	No_id	No_id	No_id	No_id	Obrac12g01170.2	Obrac12g01310.1	No_id	Lperr11g01290.1	Lperr12g01560.1	10.0455	2.00547	0	0	0	0	0	0	0	0	0	0	0	0	0	0	0	4.52752	0	0	0	0	0	0	0	0	0	0	0	0	0	0
Osjap11g02640.1	Osjap07g04360.1	Osjap12g12870.1	Obart12g02080.1	No_id	No_id	Oglab12g02130.1	Oglab12g09880.1	Oglab07g03810.1	No_id	Opunc12g08740.1	Opunc11g02190.1	No_id	Obrac05g10860.1	Obrac12g07170.1	No_id	Lperr12g02190.1	Lperr12g08370.1	0	0.543765	4.97426	0	0	0	0	0	0	0	0	0	0	0	0	0	0	0	1.85466	91.8216	3.44034	0	0	0	0	0	0	0	0	0	0	0
Osjap11g03190.1	Osjap12g03260.1	Osjap11g03620.1	No_id	Obart11g02910.1	Obart11g02890.1	No_id	Oglab11g02820.1	Oglab11g02800.1	No_id	Opunc11g02560.1	Opunc12g02460.1	No_id	No_id	No_id	No_id	No_id	No_id	6.53336	0	0	0	0	0	0	0	0.926129	0	0	0	8.62589	7.11387	7.31633	6.48112	0	34.2912	0	0	0	0	0	0	1.08359	0	7.37427	0	0	0	0	0
Osjap11g03220.1	Osjap12g03280.1	Osjap12g03300.1	No_id	Obart11g02960.2	Obart11g02940.2	No_id	Oglab11g02870.1	Oglab11g02850.3	No_id	Opunc11g02640.1	Opunc12g02490.1	No_id	Obrac11g01750.1	Obrac12g02140.1	No_id	Lperr11g02500.4	Lperr12g02610.1	4.78144	0	8.6265	0	0.17012	0.407334	0	1.2892	0.907916	0	0	0	10.6962	2.63356	3.36876	8.09897	12.2316	8.12422	0	0	0	0	0	0	0	0	0	0	0	0	0	0
Osjap11g21440.1	Osjap10g09150.2	Osjap03g43210.1	Obart11g18650.1	Obart10g07740.1	Obart03g02940.1	Oglab11g16480.1	Oglab11g20100.1	Oglab03g37880.1	No_id	Opunc05g18050.1	Opunc03g37060.1	No_id	Obrac03g30000.2	Obrac05g13790.3	No_id	Lperr03g33980.1	Lperr11g13500.1	0	3.64316	0	1.3846	1.70813	3.06802	1.52283	13.0611	10.2709	3.16254	6.26536	1.51432	1.72422	6.46071	1.66956	7.94882	75.0674	18.0156	0	0	0	0	0	0	0	0	0	0	0	0	0	2.77004
Osjap11g25180.1	Osjap11g25230.1	Osjap03g12940.2	No_id	Obart03g11990.1	Obart11g21600.1	No_id	Oglab03g12000.1	Oglab11g18660.1	No_id	Opunc11g17740.1	Opunc11g18020.1	No_id	Obrac11g12750.1	Obrac11g12680.1	No_id	Lperr11g18000.1	Lperr03g10630.5	0	6.57927	0	0	0	0	22.6769	23.4799	0	0	0	0	0	0	0	0	0	1.93817	0	0	0	0	0	0	0	0	0	0	0	0	0	0
Osjap12g01140.1	Osjap07g30390.1	Osjap03g13100.1	Obart11g01060.1	Obart03g12120.1	Obart10g06750.1	Oglab12g00800.1	Oglab07g22980.1	Oglab03g12120.1	Opunc12g00940.1	Opunc11g00920.1	Opunc03g11680.1	No_id	Obrac03g09720.2	Obrac10g04150.1	No_id	Lperr03g10720.1	Lperr11g00920.1	2.75887	1.29322	3.38542	0	0	0	0	4.70804	0	0	0	10.4761	6.84716	12.0779	10.2992	14.8837	36.1865	0	0	0	0	0	0	0	0	0	0	6.2501	2.78582	0	6.9676	2.5174
Osjap12g02200.1	No_id	No_id	Obart11g01960.3	Obart12g01860.1	Obart12g01850.1	Oglab11g01770.1	Oglab12g01850.1	Oglab06g17410.1	No_id	No_id	No_id	No_id	Obrac11g01280.1	Obrac12g01600.1	Lperr12g01900.1	Lperr11g01770.1	Lperr11g01750.3	0	0	0	0	0	0	0	0	0	0	10.5509	0.325635	0	0	0.0815552	0	0.655127	0	0	0	0	0	0	0	0	0	0	0	0	0	0	0
Osjap12g02870.1	No_id	No_id	No_id	Obart12g02320.1	Obart11g02600.1	No_id	Oglab12g02360.1	Oglab12g02350.1	No_id	Opunc12g02360.1	Opunc12g02350.2	No_id	Obrac12g02000.1	Obrac03g28840.1	No_id	Lperr12g02430.1	Lperr03g32810.1	0	0	0	0	0	0	0	0	0	0	0	0	0	0	0	6.44512	11.9993	9.55213	0	0	0	0	0	0	0.802784	0	5.73966	0	0	0	0	0
Osjap12g06950.3	No_id	No_id	No_id	No_id	No_id	No_id	Oglab11g11670.1	Oglab12g05700.2	No_id	Opunc07g20590.1	Opunc12g05420.1	No_id	No_id	No_id	No_id	No_id	No_id	0	0.74578	0	0	0	0	0	0	0	0	0	0	0	0	0	0	0	0	0	0	0	0	0	0	0	0	0	0	0	0	0	0
Osjap12g06950.5	No_id	No_id	No_id	No_id	No_id	No_id	Oglab11g11670.1	Oglab12g05700.2	No_id	Opunc07g20590.1	Opunc12g05420.1	No_id	No_id	No_id	No_id	No_id	No_id	0	0.74578	0	0	0	0	0	0	0	0	0	0	0	0	0	0	0	0	0	0	0	0	0	0	0	0	0	0	0	0	0	0
Osjap12g06950.6	No_id	No_id	No_id	Obart12g05660.3	Obart11g13140.1	No_id	Oglab11g11670.1	Oglab12g05700.2	No_id	Opunc07g20590.1	Opunc12g05420.1	No_id	No_id	No_id	No_id	No_id	No_id	1.23459	0.74578	0	0	0	0	0	0	0	0	0	0	0	0	0	0	0	0	0	0	0	0	0	0	0	0	0	0	0	0	0	0
Osjap12g12320.1	Osjap01g44780.2	Osjap03g07600.1	Obart12g09410.1	Obart01g39260.3	Obart03g07210.1	Oglab12g09470.1	Oglab03g07280.1	Oglab01g34040.1	No_id	Opunc12g08570.1	Opunc02g11250.1	No_id	Obrac03g05880.1	Obrac12g06500.1	No_id	Lperr12g08310.1	Lperr03g06600.1	0	0	0	3.82764	9.26629	7.48309	36.9603	793.124	148.345	0	0	0	5.89957	15.5926	7.03977	209.089	244.17	285.624	0	0	0	0	0	0	1.51795	0	2.8868	0	0	0	13.576	4.80782
Osjap12g13600.1	Osjap01g05590.1	Osjap06g06030.1	Obart12g10510.1	Obart03g17930.1	Obart01g16250.1	Oglab01g22960.1	No_id	No_id	Opunc10g03560.1	Opunc03g17210.1	Opunc06g05170.1	No_id	No_id	No_id	No_id	Lperr01g04610.1	Lperr03g05500.1	0	0	0	0	0	0	0	1.40328	0	0	0	0	0	0	0	0	6.32886	0.434004	0	0	0	0	0	0	0	0	0	0	0	0	0	0
Osjap12g18490.1	No_id	No_id	No_id	Obart09g13250.1	Obart12g14470.1	Oglab12g13500.1	Oglab08g16770.1	Oglab01g13480.1	No_id	Opunc01g16700.1	Opunc08g16120.1	No_id	No_id	No_id	No_id	Lperr12g11870.1	Lperr01g14290.1	6.66927	23.008	20.757	0	0	0	0	0	0	0	0	0	0	0	0.704491	8.59373	37.9802	6.24532	0	0	0	0	0	1.70821	1.47921	16.6084	14.785	0	0	0	0	23.5061
Osjap12g19810.1	Osjap12g19770.1	Osjap07g08090.1	No_id	Obart03g38270.2	Obart12g15400.1	No_id	Oglab06g04730.1	Oglab12g14370.2	No_id	Opunc03g35430.1	Opunc12g13920.1	No_id	Obrac12g09830.1	Obrac06g03630.1	No_id	Lperr12g12590.1	Lperr07g06070.1	0	0	0	0	10.5178	0	79.6828	4.6345	161.12	0	0	0	0	0	0	50.116	593.175	15.9601	0	0	0	0	0	0	9.80978	0	26.5734	0	0	0	0	0
Osjap12g24450.1	Osjap07g31120.1	Osjap03g06030.1	No_id	Obart12g19340.1	Obart03g05850.1	No_id	Oglab12g17530.1	Oglab12g17520.1	No_id	Opunc12g17530.1	Opunc12g17520.1	No_id	Obrac07g18220.1	Obrac12g12740.1	No_id	Lperr07g23910.1	Lperr12g16150.1	0	0	0	0	0	0	2.85706	14.1286	8.99447	0	0	0	0	0	0	4.36126	10.1525	4.78442	0	0	0	0	0	0	0	0	0	0	0	0	0	0
[truncated: 22 more columns]
