# Supplementary material for: Gene fusion as an important mechanism to generate new genes in the genus Oryza
Source: Genome Biol. 2022 Jun 15;23:130. doi: 10.1186/s13059-022-02696-w (PMC9199173; doi:10.1186/s13059-022-02696-w)
Supplement: Supplementary file 7 — Additional file 7. Correlation between the maximum FPKM value of long-homologous copies and the short-homologous copies in four Oryza species. [file 13059_2022_2696_MOESM7_ESM.xlsx]

## Sheet: Table S5
Table S5 Correlation between the maximum FPKM value of long-homologous copies and the short-homologous copies in four Oryza species.
IDs	fusion-gene	barthii-long-copy	glab-long-copy	punctata-long-copy	brachy-long-copy	leersia-long-copy	japonica-short-copy	barthii-short-copy	glab-short-copy	punctata-short-copy	brachy-short-copy	leersia-short-copy
LOC_Os08g03290	7.6125	7.36596	1.96655	4.65347	6.93217	0	7.6125	7.36596	1.96655	4.65347	6.93217	0
Osjap01g00500	4.00851	0	0	0	0	0	4.06663	3.67642	4.00547	0	2.8154	0
Osjap01g00640	2.51485	0	0	0	0	0	2.91999	3.84192	2.45629	4.76839	3.56962	4.08407		the FPKM value here is the maximum expression level among three tissues in each species.
Osjap01g08660	1.13719	0	1.93933	0	0	0	3.04996	3.00914	2.68895	3.81693	3.06139	3.1627
Osjap01g13630	4.24461	0	4.27806	0	3.32811	0	0	5.75592	0	0	6.57626	6.303
Osjap01g30020	7.7422	0	0	0	0	0	0	4.784	3.59686	4.32987	5.6041	5.11791
Osjap01g31520	3.29393	0	0	0	0	0	4.35905	6.0515	-0.53534	4.44798	0	4.34669
Osjap01g33510	2.15488	0	0	0	2.45675	0	2.90801	4.34258	0	4.69868	2.79485	4.64224
Osjap01g42770	1.66178	0	0	0	0	0	6.03483	5.56809	5.4307	4.02701	3.75833	5.30561
Osjap01g50410	3.91651	0	0	0	0	0	2.34158	3.43429	0	3.93661	4.0211	4.28511
Osjap02g04220	3.37735	0	0	0	0	0	0	5.60113	1.37985	0	5.12745	5.21751
Osjap02g16210	2.96872	0	0	0	0	0	0	4.2998	-1.73239	0	3.91612	0
Osjap02g23220	2.41577	0	0	0	4.78074	0	3.83341	4.03575	0	5.25833	1.03547	4.2057
Osjap02g28800	1.63247	0	0	1.89203	0	3.50078	4.53384	3.10575	0	4.23363	0	5.07767
Osjap02g30600	3.97093	0	0	0	0	0	4.8218	5.24725	0	0	4.16025	0
Osjap02g40340	6.10607	0	0	0	0	0	4.25028	6.4183	0	6.22791	5.49546	6.23402
Osjap02g41000	2.89102	0	0	0	0	0	0	2.34439	0	5.14022	1.52986	2.56827
Osjap03g13100	1.54927	3.375	0	0	0	0	2.00654	2.3491	0	1.54666	3.84472	1.8464
Osjap03g14020	1.78804	0	0	0	0	0	-1.74251	1.36657	0	3.42259	0.874656	3.0902
Osjap03g34330	5.94127	4.69016	0	0	0	0	4.21355	4.36362	0	4.58034	4.80541	5.94956
Osjap03g44070	-1.57103	0	0	0	0	0	-1.73495	4.57454	0	0	4.19767	1.45486
Osjap03g44320	1.92488	0	0	0	0	0	0.991583	3.80805	0	4.18389	3.56681	4.63921
Osjap03g44530	0.653959	0	0	0	4.43272	0	2.77112	3.81388	0	0	4.05363	3.91988
Osjap04g02830	0.296847	0	0	0	0	0	-2.04071	2.69855	0	0	0.795383	0
Osjap04g11160	1.87868	0	0	0	0	2.81196	2.28675	2.01122	0	3.99779	0	3.06703
Osjap04g13840	1.74489	0	0	0	0	0	5.8262	6.10791	0	5.71439	5.83727	2.48948
Osjap04g19980	2.26418	0	0	0	0	0	1.47259	2.79628	0	4.47914	3.18658	3.11296
Osjap04g30120	0.320996	-0.120638	0	0	-0.419428	0	-1.05071	0.579039	1.61243	0	1.46592	0
Osjap04g34120	3.58344	0	0	0	0	0	0	4.61466	0	5.6584	5.44979	5.86129
Osjap05g00220	3.07861	0	0	0	0	0	1.99642	4.02395	2.68532	5.13169	3.89905	4.93667
Osjap05g02530	1.63846	3.0919	0	0	0	0	1.80225	3.23233	0	3.14123	4.16876	0
Osjap05g04120	3.23558	3.85983	0	3.38382	4.27849	0	4.25219	4.55138	2.28337	5.21692	5.33182	0
Osjap05g14570	-0.937193	0	0	0	0	0	0	0	0	0	0	0
Osjap05g20040	4.6952	0	0	0	0	0	3.3543	5.03371	0.0409116	4.96563	4.84536	4.67689
Osjap05g29150	3.14475	0	0	0	0	0	0	4.73171	4.25231	5.22906	3.12796	3.58047
Osjap05g30140	1.75893	0	0	0	0	0	0	2.05324	0	3.26632	3.31415	2.68323
Osjap06g00390	1.94736	0	0	0	0	0	3.33664	3.59912	0	4.44542	4.19767	4.23411
Osjap06g03630	1.52218	0	0	4.0398	0	0	0	3.5055	0	3.80036	0.451197	4.74992
Osjap06g08210	2.76383	0	0	0	0	0	3.5895	0	0.540614	0	4.00584	0
Osjap06g14300	-0.321524	0	0	0	0	0	0.228366	3.42517	0	3.90156	3.89261	3.18439
Osjap06g27840	6.73264	0	0	0	0	0	6.16527	5.05545	2.7949	0	0	0
Osjap06g31140	4.5026	0	0	0	0	0	4.62227	4.72435	1.43737	4.23861	5.52086	4.59051
Osjap06g33090	1.28931	0	0	0	0	0	0	3.69359	0	5.51921	4.6066	0
Osjap07g04240	3.91468	0	0	0	0	0	0	3.70797	3.95636	0	4.12603	4.4537
Osjap07g11390	0.655861	0	0	0	0	0	0	-0.152604	0	2.00935	0.913286	0
Osjap07g22430	4.32125	4.24017	0	0	0	0	0	4.24017	1.86819	4.79394	5.02329	5.70341
Osjap07g25530	0.535469	0	0	0	0	0	3.83473	4.3559	0	0	0	0
Osjap07g28390	0.296513	0	0	0	0	0	0.183637	2.36696	0	0	2.29007	0
Osjap08g04940	0.261696	0	0	-1.05544	0	0	0	4.1668	0	4.55027	4.02247	3.13923
Osjap08g06650	4.5758	5.15779	0	4.14066	0	0	4.79755	5.29274	2.5017	3.69888	5.19665	4.00082
Osjap08g19480	2.6198	0	0	0	0	0	3.48227	3.4499	4.37506	4.33033	3.6779	3.99343
Osjap09g00070	-0.431599	3.50172	2.6618	3.91242	0	0	2.55673	3.37417	-1.10617	0	0	0
Osjap09g03990	3.44135	0	0	0	0	0	5.24431	3.63134	3.52182	3.88692	4.25392	3.36268
Osjap09g06840	4.79969	2.88863	0	2.91302	0	0	4.36464	3.02308	0	0	3.89709	5.12411
Osjap09g15430	2.18337	0.71189	0	0	5.13565	0	4.63716	4.72823	0	5.14753	4.44881	4.29453
Osjap09g20460	1.85857	2.49358	0	0	0	0	2.85323	3.24343	0	4.00827	2.54967	3.66179
Osjap10g04950	0.0242945	2.34565	0.100805	0	0	0	2.69769	3.11493	0	3.18637	3.46265	3.24173
Osjap10g12540	2.99793	0	0	0	0	0	3.57893	3.90675	0	4.78892	4.26015	4.39348
Osjap10g14600	3.21537	1.61894	0	5.61138	0	0	4.10354	4.17646	0	4.20075	4.26847	5.25901
Osjap10g15240	1.23629	0	0	0	0	0	1.61684	3.14458	0	3.91468	3.13329	3.01841
Osjap11g01220	2.03543	2.3491	0	2.20121	0	0	1.54927	3.375	0	2.88981	3.84472	2.92911
Osjap11g01770	2.48915	0	0	0	0	0	0	4.29762	0	2.33181	1.44215	5.0213
Osjap11g02640	1.70802	0	4.57591	0	0	0	0	0	0	0	1.88745	0
Osjap11g03190	1.87692	0	0	0	0	0	-0.0767417	3.708	2.1351	0	2.03669	0
Osjap11g03220	2.59585	0	0	0	0	0	0.787146	3.34832	0	4.17884	3.08927	3.02656
Osjap11g21440	1.29285	2.39263	0	0	0	0	3.21305	4.61544	0	-0.475113	3.70281	0.400975
Osjap11g25180	1.88392	0	0	0	0	0	3.83204	0.661744	0	1.68868	0	2.25575
Osjap12g01140	2.00654	2.3491	0	2.20121	0	0	1.54927	3.9332	0	5.51406	3.84472	2.92911
Osjap12g06950	0.683284	0	0	0	0	0	0	0	0	0	2.51804	0
Osjap12g18490	3.92067	0	0	0	0	0	0	3.96688	3.49264	0	4.64228	4.2825
