# Supplementary material for: Gene fusion as an important mechanism to generate new genes in the genus Oryza
Source: Genome Biol. 2022 Jun 15;23:130. doi: 10.1186/s13059-022-02696-w (PMC9199173; doi:10.1186/s13059-022-02696-w)
Supplement: Supplementary file 8 — Additional file 8. The generation patterns of fusion genes. [file 13059_2022_2696_MOESM8_ESM.xlsx]

## Sheet: Table S6
Table S6 The generation patterns of fusion genes.
	Fusion gene id	Short copy 1 in japonica	Short copy 2 in japonica	Parental gene is detectable in focus species	Parental gene is close to fusion genes	Fusion gene presented at O.rufipogon or indica	Parental genes located in the same region		Outgroup species only have one short copy in A.thaliana and L.perrieri
		5’ end	3’ end				Focus species	Other species
1	Osjap01g50410	Osjap05g17010	Osjap05g22890	two	N	N	N	Y
2	Osjap02g23220	Osjap03g34460	Osjap04g16230	two	N	N	N	Y
3	Osjap02g28800	Osjap04g33800	Osjap11g07330	two	N	Y	N	Y
4	Osjap04g02830	Osjap04g02720	Osjap04g02730	two	Y	Y	Y	N	Y
5	Osjap06g00390	Osjap06g28340	Osjap07g16770	two	N	N	N	Y
6	Osjap09g03990	Osjap09g14680	Osjap05g14220	two	N	Y	N	Y
7	Osjap10g15240	Osjap03g03010	Osjap03g36880	two	N	N	N	Y
8	Osjap11g03190	Osjap11g03620	Osjap12g03260	two	N	N	N	Y	Y
9	Osjap11g03220	Osjap12g03300	Osjap12g03280	two	N	N	Y	Y
10	Osjap03g44070	Osjap05g21490	Osjap03g44260	two	N	Y	N	N
11	Osjap05g14570	Osjap05g14540	Osjap01g31830	two	Y	Y	N	N	Y
12	Osjap09g20460	Osjap02g21530	Osjap09g20430	two	Y	Y	N	Y
13	Osjap01g00640	Osjap05g00080	Osjap04g25390	two	N	Y	N	Y
14	Osjap01g08660	Osjap01g29230	Osjap05g00560	two	N	Y	N	Y
15	Osjap01g31520	Osjap01g31460	Osjap01g14430	two	Y	Y	N	N
16	Osjap01g33510	Osjap03g28950	Osjap02g13850	two	N	N	N	N
17	Osjap01g42770#	Osjap01g08100	Osjap03g27560	two	N	Y	N	Y
18	Osjap02g30600	Osjap04g31350	Osjap04g25080	two	N	Y	N	N	Y
19	Osjap02g40340*	Osjap03g26380	Osjap02g41540	two	N	Y	N	N
20	Osjap03g13100	Osjap12g01140	Osjap04g16240	two	N	Y	N	Y
21	Osjap03g34330	Osjap10g05370	Osjap03g39110	two	N	Y	N	N
22	Osjap03g44320	Osjap04g33070	Osjap05g18460	two	N	Y	N	N
23	Osjap04g11160	Osjap11g14300	Osjap10g21270	two	N	Y	N	Y
24	Osjap04g30120	Osjap04g16240	Osjap05g24420	two	N	Y	N	N
25	Osjap05g02530	Osjap06g18010	Osjap03g00960	two	N	Y	N	N	Y
26	Osjap05g04120	Osjap01g27410	Osjap03g15140	two	N	Y	N	N
27	Osjap06g08210	Osjap02g37570	Osjap09g13400	two	N	N	N	N	Y
28	Osjap07g04240	Osjap12g10970	Osjap04g16300	two	N	N	N	N
29	Osjap08g06650	Osjap04g21220	Osjap09g20870	two	N	Y	N	Y
30	Osjap09g00070	Osjap09g04150	Osjap02g38200	two	N	Y	N	N	Y
31	Osjap11g01220	Osjap07g30390	Osjap03g13100	two	N	Y	N	N
32	Osjap11g02640	Osjap07g04360	Osjap12g12870	two	N	Y	N	N
33	Osjap11g21440	Osjap10g09150	Osjap03g43210	two	N	Y	N	N
34	Osjap11g25180#	Osjap11g25230	Osjap03g12940	two	Y	N	N	N
35	Osjap12g01140	Osjap07g30390	Osjap03g13100	two	N	Y	N	N
36	Osjap01g00500	/	Osjap01g00490	one	Y	N	/	Y	Y
37	Osjap03g14020	Osjap01g07780	/	one	N	N	/	N
38	Osjap03g44530	Osjap07g07980	/	one	N	Y	/	Y
39	Osjap04g13840	/	Osjap09g21020	one	N	N	/	Y
40	Osjap04g19980	Osjap07g05530	/	one	N	N	/	Y
41	Osjap05g00220	/	Osjap06g12050	one	N	Y	/	Y
42	Osjap05g20040	/	Osjap08g00350	one	N	N	/	Y
43	Osjap06g31140	Osjap02g03060	/	one	N	N	/	Y
44	Osjap07g25530	/	Osjap03g05920	one	N	N	/	Y	Y
45	Osjap08g19480	Osjap05g21810	/	one	N	N	/	Y
46	Osjap09g06840	/	Osjap03g08670	one	N	N	/	Y
47	Osjap10g14600	/	Osjap08g12520	one	N	Y	/	N
48	Osjap06g14300	Osjap04g18730	/	one	N	N	/	N
49	Osjap06g27840	Osjap04g09410	/	one	N	Y	/	N	Y
50	Osjap07g28390	/	Osjap04g19780	one	N	N	/	N	Y
51	Osjap09g15430	Osjap02g06650	/	one	N	Y	/	N
52	Osjap10g04950	/	Osjap07g13660	one	N	Y	/	N
53	Osjap10g12540	/	Osjap02g39060	one	N	N	/	N
54	Osjap11g01770	Osjap11g01890	/	one	N	N	/	N
55	Osjap01g13630	/	/	none	/	Y	/	Y
56	Osjap01g30020	/	/	none	/	N	/	Y
57	Osjap02g16210	/	/	none	/	N	/	Y	Y
58	Osjap02g41000	/	/	none	/	N	/	Y
59	Osjap04g34120	/	/	none	/	N	/	Y
60	Osjap05g29150	/	/	none	/	N	/	Y
61	Osjap05g30140	/	/	none	/	N	/	Y
62	Osjap06g03630	/	/	none	/	N	/	Y
63	Osjap06g33090	/	/	none	/	N	/	Y
64	Osjap07g11390	/	/	none	/	N	/	Y
65	Osjap02g04220	/	/	none	/	N	/	N
66	Osjap07g22430	/	/	none	/	Y	/	N
67	Osjap08g04940	/	/	none	/	Y	/	Y
68	Osjap12g06950	/	/	none	/	N	/	N	Y(no any short copy)
69	Osjap12g18490	/	/	none	/	N	/	N
*There are three short copies of this fusion gene, the mid short copy is Osjap05g23970.
#These fusion genes may formatted by RNA based gene fusion.
