# Supplementary material for: Gene fusion as an important mechanism to generate new genes in the genus Oryza
Source: Genome Biol. 2022 Jun 15;23:130. doi: 10.1186/s13059-022-02696-w (PMC9199173; doi:10.1186/s13059-022-02696-w)
Supplement: Supplementary file 10 — Additional file 10. Gene structure re-annotation of species-specific fusion gene in four focus species. [file 13059_2022_2696_MOESM10_ESM.xlsx]

## Sheet: Table S8
Table S8 Gene structure re-annotation of species-specific fusion gene in four focus species.
chr01	StringTie	transcript	327337	332274	1000	-	.	ID=Osjap01g00500;Name=Osjap01g00500.1
chr01	StringTie	CDS	327337	327500	1000	-	.	ID=Osjap01g00500;Parent=Osjap01g00500.1
chr01	StringTie	CDS	327618	328402	1000	-	.	ID=Osjap01g00500;Parent=Osjap01g00500.1
chr01	StringTie	CDS	331637	332274	1000	-	.	ID=Osjap01g00500;Parent=Osjap01g00500.1
chr03	StringTie	transcript	9725510	9732922	1000	-	.	ID=Osjap03g14020;Name=Osjap03g14020.1
chr03	StringTie	CDS	9725510	9725936	1000	-	.	ID=Osjap03g14020;Parent=Osjap03g14020.1
chr03	StringTie	CDS	9726540	9726919	1000	-	.	ID=Osjap03g14020;Parent=Osjap03g14020.1
chr03	StringTie	CDS	9727025	9727154	1000	-	.	ID=Osjap03g14020;Parent=Osjap03g14020.1
chr03	StringTie	CDS	9727304	9727611	1000	-	.	ID=Osjap03g14020;Parent=Osjap03g14020.1
chr03	StringTie	CDS	9728146	9728252	1000	-	.	ID=Osjap03g14020;Parent=Osjap03g14020.1
chr03	StringTie	CDS	9728317	9728371	1000	-	.	ID=Osjap03g14020;Parent=Osjap03g14020.1
chr03	StringTie	CDS	9729804	9729899	1000	-	.	ID=Osjap03g14020;Parent=Osjap03g14020.1
chr03	StringTie	CDS	9731150	9732922	1000	-	.	ID=Osjap03g14020;Parent=Osjap03g14020.1
chr03	StringTie	transcript	10647774	10655438	1000	+	.	ID=Osjap03g15380;Name=Osjap03g15380.1
chr03	StringTie	CDS	10647774	10648495	1000	+	.	ID=Osjap03g15380;Parent=Osjap03g15380.1
chr03	StringTie	CDS	10650710	10650891	1000	+	.	ID=Osjap03g15380;Parent=Osjap03g15380.1
chr03	StringTie	CDS	10651477	10651575	1000	+	.	ID=Osjap03g15380;Parent=Osjap03g15380.1
chr03	StringTie	CDS	10651701	10653157	1000	+	.	ID=Osjap03g15380;Parent=Osjap03g15380.1
chr03	StringTie	CDS	10653988	10654924	1000	+	.	ID=Osjap03g15380;Parent=Osjap03g15380.1
chr03	StringTie	CDS	10655422	10655438	1000	+	.	ID=Osjap03g15380;Parent=Osjap03g15380.1
chr03	StringTie	transcript	24632613	24641414	1000	-	.	ID=Osjap03g29590;Name=Osjap03g29590.1
chr03	StringTie	CDS	24632613	24632634	1000	-	.	ID=Osjap03g29590;Parent=Osjap03g29590.1
chr03	StringTie	CDS	24633120	24633246	1000	-	.	ID=Osjap03g29590;Parent=Osjap03g29590.1
chr03	StringTie	CDS	24633354	24633472	1000	-	.	ID=Osjap03g29590;Parent=Osjap03g29590.1
chr03	StringTie	CDS	24633578	24633869	1000	-	.	ID=Osjap03g29590;Parent=Osjap03g29590.1
chr03	StringTie	CDS	24638499	24638590	1000	-	.	ID=Osjap03g29590;Parent=Osjap03g29590.1
chr03	StringTie	CDS	24638731	24638883	1000	-	.	ID=Osjap03g29590;Parent=Osjap03g29590.1
chr03	StringTie	CDS	24641302	24641414	1000	-	.	ID=Osjap03g29590;Parent=Osjap03g29590.1
chr03	StringTie	transcript	33138855	33145988	1000	-	.	ID=Osjap03g40400;Name=Osjap03g40400.1
chr03	StringTie	CDS	33138855	33139412	1000	-	.	ID=Osjap03g40400;Parent=Osjap03g40400.1
chr03	StringTie	CDS	33139785	33140144	1000	-	.	ID=Osjap03g40400;Parent=Osjap03g40400.1
chr03	StringTie	CDS	33141183	33141211	1000	-	.	ID=Osjap03g40400;Parent=Osjap03g40400.1
chr03	StringTie	CDS	33143835	33143934	1000	-	.	ID=Osjap03g40400;Parent=Osjap03g40400.1
chr03	StringTie	CDS	33144888	33145988	1000	-	.	ID=Osjap03g40400;Parent=Osjap03g40400.1
chr03	StringTie	transcript	35626073	35629495	1000	+	.	ID=Osjap03g44320;Name=Osjap03g44320.1
chr03	StringTie	CDS	35626073	35626342	1000	+	.	ID=Osjap03g44320;Parent=Osjap03g44320.1
chr03	StringTie	CDS	35626450	35626543	1000	+	.	ID=Osjap03g44320;Parent=Osjap03g44320.1
chr03	StringTie	CDS	35626668	35626783	1000	+	.	ID=Osjap03g44320;Parent=Osjap03g44320.1
chr03	StringTie	CDS	35628692	35628736	1000	+	.	ID=Osjap03g44320;Parent=Osjap03g44320.1
chr03	StringTie	CDS	35629286	35629495	1000	+	.	ID=Osjap03g44320;Parent=Osjap03g44320.1
chr04	StringTie	transcript	3853320	3857891	1000	+	.	ID=Osjap04g02830;Name=Osjap04g02830.1
chr04	StringTie	CDS	3853320	3854402	1000	+	.	ID=Osjap04g02830;Parent=Osjap04g02830.1
chr04	StringTie	CDS	3854762	3854793	1000	+	.	ID=Osjap04g02830;Parent=Osjap04g02830.1
chr04	StringTie	CDS	3856958	3857891	1000	+	.	ID=Osjap04g02830;Parent=Osjap04g02830.1
chr04	StringTie	transcript	19693584	19701066	1000	-	.	ID=Osjap04g13840;Name=Osjap04g13840.6
chr04	StringTie	CDS	19693584	19693918	1000	-	.	ID=Osjap04g13840;Parent=Osjap04g13840.6
chr04	StringTie	CDS	19694105	19694303	1000	-	.	ID=Osjap04g13840;Parent=Osjap04g13840.6
chr04	StringTie	CDS	19696441	19696524	1000	-	.	ID=Osjap04g13840;Parent=Osjap04g13840.6
chr04	StringTie	CDS	19696596	19696658	1000	-	.	ID=Osjap04g13840;Parent=Osjap04g13840.6
chr04	StringTie	CDS	19696742	19696822	1000	-	.	ID=Osjap04g13840;Parent=Osjap04g13840.6
chr04	StringTie	CDS	19696912	19697067	1000	-	.	ID=Osjap04g13840;Parent=Osjap04g13840.6
chr04	StringTie	CDS	19697155	19697229	1000	-	.	ID=Osjap04g13840;Parent=Osjap04g13840.6
chr04	StringTie	CDS	19697921	19698031	1000	-	.	ID=Osjap04g13840;Parent=Osjap04g13840.6
chr04	StringTie	CDS	19698650	19698748	1000	-	.	ID=Osjap04g13840;Parent=Osjap04g13840.6
chr04	StringTie	CDS	19700706	19700778	1000	-	.	ID=Osjap04g13840;Parent=Osjap04g13840.6
chr04	StringTie	CDS	19701014	19701066	1000	-	.	ID=Osjap04g13840;Parent=Osjap04g13840.6
chr04	StringTie	transcript	24294230	24300589	1000	+	.	ID=Osjap04g19980;Name=Osjap04g19980.2
chr04	StringTie	CDS	24294230	24295497	1000	+	.	ID=Osjap04g19980;Parent=Osjap04g19980.2
chr04	StringTie	CDS	24295592	24295634	1000	+	.	ID=Osjap04g19980;Parent=Osjap04g19980.2
chr04	StringTie	CDS	24296370	24297108	1000	+	.	ID=Osjap04g19980;Parent=Osjap04g19980.2
chr04	StringTie	CDS	24298078	24298116	1000	+	.	ID=Osjap04g19980;Parent=Osjap04g19980.2
chr04	StringTie	CDS	24298693	24298821	1000	+	.	ID=Osjap04g19980;Parent=Osjap04g19980.2
chr04	StringTie	CDS	24299279	24299506	1000	+	.	ID=Osjap04g19980;Parent=Osjap04g19980.2
chr04	StringTie	CDS	24300384	24300589	1000	+	.	ID=Osjap04g19980;Parent=Osjap04g19980.2
chr05	StringTie	transcript	179429	184709	1000	-	.	ID=Osjap05g00220;Name=Osjap05g00220.1
chr05	StringTie	CDS	179429	179536	1000	-	.	ID=Osjap05g00220.1;Parent=Osjap05g00220.1
chr05	StringTie	CDS	179732	179833	1000	-	.	ID=Osjap05g00220.1;Parent=Osjap05g00220.1
chr05	StringTie	CDS	179986	180072	1000	-	.	ID=Osjap05g00220.1;Parent=Osjap05g00220.1
chr05	StringTie	CDS	180190	180324	1000	-	.	ID=Osjap05g00220.1;Parent=Osjap05g00220.1
chr05	StringTie	CDS	180454	180669	1000	-	.	ID=Osjap05g00220.1;Parent=Osjap05g00220.1
chr05	StringTie	CDS	181117	181388	1000	-	.	ID=Osjap05g00220.1;Parent=Osjap05g00220.1
chr05	StringTie	CDS	182691	182739	1000	-	.	ID=Osjap05g00220.1;Parent=Osjap05g00220.1
chr05	StringTie	CDS	183002	183073	1000	-	.	ID=Osjap05g00220.1;Parent=Osjap05g00220.1
chr05	StringTie	CDS	183422	183530	1000	-	.	ID=Osjap05g00220.1;Parent=Osjap05g00220.1
chr05	StringTie	CDS	183617	183715	1000	-	.	ID=Osjap05g00220.1;Parent=Osjap05g00220.1
chr05	StringTie	CDS	184531	184709	1000	-	.	ID=Osjap05g00220.1;Parent=Osjap05g00220.1
chr05	StringTie	transcript	16471387	16474131	1000	-	.	ID=Osjap05g14570;Name=Osjap05g14570.1
chr05	StringTie	CDS	16471387	16471488	1000	-	.	ID=Osjap05g14570;Parent=Osjap05g14570.1
chr05	StringTie	CDS	16471902	16472129	1000	-	.	ID=Osjap05g14570;Parent=Osjap05g14570.1
chr05	StringTie	CDS	16472265	16472544	1000	-	.	ID=Osjap05g14570;Parent=Osjap05g14570.1
chr05	StringTie	CDS	16473167	16474131	1000	-	.	ID=Osjap05g14570;Parent=Osjap05g14570.1
chr05	StringTie	transcript	21202084	21207420	1000	+	.	ID=Osjap05g20040;Name=Osjap05g20040.1
chr05	StringTie	CDS	21202084	21203124	1000	+	.	ID=Osjap05g20040;Parent=Osjap05g20040.1
chr05	StringTie	CDS	21203969	21204172	1000	+	.	ID=Osjap05g20040;Parent=Osjap05g20040.1
chr05	StringTie	CDS	21204257	21204463	1000	+	.	ID=Osjap05g20040;Parent=Osjap05g20040.1
chr05	StringTie	CDS	21204712	21204727	1000	+	.	ID=Osjap05g20040;Parent=Osjap05g20040.1
chr05	StringTie	CDS	21205854	21206092	1000	+	.	ID=Osjap05g20040;Parent=Osjap05g20040.1
chr05	StringTie	CDS	21206219	21206324	1000	+	.	ID=Osjap05g20040;Parent=Osjap05g20040.1
chr05	StringTie	CDS	21207058	21207206	1000	+	.	ID=Osjap05g20040;Parent=Osjap05g20040.1
chr05	StringTie	CDS	21207325	21207420	1000	+	.	ID=Osjap05g20040;Parent=Osjap05g20040.1
chr05	StringTie	transcript	24104180	24109990	1000	-	.	ID=Osjap05g23780;Name=Osjap05g23780.1
chr05	StringTie	CDS	24104180	24105754	1000	-	.	ID=Osjap05g23780;Parent=Osjap05g23780.1
chr05	StringTie	CDS	24107820	24108056	1000	-	.	ID=Osjap05g23780;Parent=Osjap05g23780.1
chr05	StringTie	CDS	24108442	24108641	1000	-	.	ID=Osjap05g23780;Parent=Osjap05g23780.1
chr05	StringTie	CDS	24109280	24109442	1000	-	.	ID=Osjap05g23780;Parent=Osjap05g23780.1
chr05	StringTie	CDS	24109540	24109746	1000	-	.	ID=Osjap05g23780;Parent=Osjap05g23780.1
chr05	StringTie	CDS	24109859	24109990	1000	-	.	ID=Osjap05g23780;Parent=Osjap05g23780.1
chr05	StringTie	transcript	26494642	26499404	1000	+	.	ID=Osjap05g26770;Name=Osjap05g26770.1
chr05	StringTie	CDS	26494642	26495021	1000	+	.	ID=Osjap05g26770;Parent=Osjap05g26770.1
chr05	StringTie	CDS	26496598	26496828	1000	+	.	ID=Osjap05g26770;Parent=Osjap05g26770.1
chr05	StringTie	CDS	26497082	26497095	1000	+	.	ID=Osjap05g26770;Parent=Osjap05g26770.1
chr05	StringTie	CDS	26497909	26498104	1000	+	.	ID=Osjap05g26770;Parent=Osjap05g26770.1
chr05	StringTie	CDS	26499220	26499404	1000	+	.	ID=Osjap05g26770;Parent=Osjap05g26770.1
chr05	StringTie	transcript	27968114	27974445	1000	-	.	ID=Osjap05g28940;Name=Osjap05g28940.1
chr05	StringTie	CDS	27968114	27968222	1000	-	.	ID=Osjap05g28940;Parent=Osjap05g28940.1
chr05	StringTie	CDS	27968700	27968787	1000	-	.	ID=Osjap05g28940;Parent=Osjap05g28940.1
chr05	StringTie	CDS	27968881	27968980	1000	-	.	ID=Osjap05g28940;Parent=Osjap05g28940.1
chr05	StringTie	CDS	27969136	27969213	1000	-	.	ID=Osjap05g28940;Parent=Osjap05g28940.1
chr05	StringTie	CDS	27970250	27970389	1000	-	.	ID=Osjap05g28940;Parent=Osjap05g28940.1
chr05	StringTie	CDS	27970522	27970681	1000	-	.	ID=Osjap05g28940;Parent=Osjap05g28940.1
chr05	StringTie	CDS	27970704	27970827	1000	-	.	ID=Osjap05g28940;Parent=Osjap05g28940.1
chr05	StringTie	CDS	27972668	27973102	1000	-	.	ID=Osjap05g28940;Parent=Osjap05g28940.1
chr05	StringTie	CDS	27973681	27974165	1000	-	.	ID=Osjap05g28940;Parent=Osjap05g28940.1
chr05	StringTie	CDS	27974281	27974445	1000	-	.	ID=Osjap05g28940;Parent=Osjap05g28940.1
chr05	StringTie	transcript	28123562	28127778	1000	+	.	ID=Osjap05g29140;Name=Osjap05g29140.1
chr05	StringTie	CDS	28123562	28123702	1000	+	.	ID=Osjap05g29140;Parent=Osjap05g29140.1
chr05	StringTie	CDS	28123824	28123985	1000	+	.	ID=Osjap05g29140;Parent=Osjap05g29140.1
chr05	StringTie	CDS	28124081	28124229	1000	+	.	ID=Osjap05g29140;Parent=Osjap05g29140.1
chr05	StringTie	CDS	28124325	28124651	1000	+	.	ID=Osjap05g29140;Parent=Osjap05g29140.1
chr05	StringTie	CDS	28125449	28125649	1000	+	.	ID=Osjap05g29140;Parent=Osjap05g29140.1
chr05	StringTie	CDS	28126421	28126481	1000	+	.	ID=Osjap05g29140;Parent=Osjap05g29140.1
chr05	StringTie	CDS	28126843	28127044	1000	+	.	ID=Osjap05g29140;Parent=Osjap05g29140.1
chr05	StringTie	CDS	28127225	28127346	1000	+	.	ID=Osjap05g29140;Parent=Osjap05g29140.1
chr05	StringTie	CDS	28127469	28127573	1000	+	.	ID=Osjap05g29140;Parent=Osjap05g29140.1
chr05	StringTie	CDS	28127695	28127778	1000	+	.	ID=Osjap05g29140;Parent=Osjap05g29140.1
chr05	StringTie	transcript	28128753	28133184	1000	-	.	ID=Osjap05g29150;Name=Osjap05g29150.1
chr05	StringTie	CDS	28128753	28128881	1000	-	.	ID=Osjap05g29150;Parent=Osjap05g29150.1
chr05	StringTie	CDS	28129031	28129153	1000	-	.	ID=Osjap05g29150;Parent=Osjap05g29150.1
chr05	StringTie	CDS	28129241	28129348	1000	-	.	ID=Osjap05g29150;Parent=Osjap05g29150.1
chr05	StringTie	CDS	28129435	28129524	1000	-	.	ID=Osjap05g29150;Parent=Osjap05g29150.1
chr05	StringTie	CDS	28129630	28129689	1000	-	.	ID=Osjap05g29150;Parent=Osjap05g29150.1
chr05	StringTie	CDS	28129780	28129842	1000	-	.	ID=Osjap05g29150;Parent=Osjap05g29150.1
chr05	StringTie	CDS	28129930	28130004	1000	-	.	ID=Osjap05g29150;Parent=Osjap05g29150.1
chr05	StringTie	CDS	28130663	28130728	1000	-	.	ID=Osjap05g29150;Parent=Osjap05g29150.1
chr05	StringTie	CDS	28130933	28131122	1000	-	.	ID=Osjap05g29150;Parent=Osjap05g29150.1
chr05	StringTie	CDS	28132250	28133184	1000	-	.	ID=Osjap05g29150;Parent=Osjap05g29150.1
chr06	StringTie	transcript	5807478	5814518	1000	+	.	ID=Osjap06g08210;Name=Osjap06g08210.1
chr06	StringTie	CDS	5807478	5807652	1000	+	.	ID=Osjap06g08210;Parent=Osjap06g08210.1
chr06	StringTie	CDS	5807754	5807848	1000	+	.	ID=Osjap06g08210;Parent=Osjap06g08210.1
chr06	StringTie	CDS	5807947	5808088	1000	+	.	ID=Osjap06g08210;Parent=Osjap06g08210.1
chr06	StringTie	CDS	5809152	5809247	1000	+	.	ID=Osjap06g08210;Parent=Osjap06g08210.1
chr06	StringTie	CDS	5809330	5809449	1000	+	.	ID=Osjap06g08210;Parent=Osjap06g08210.1
chr06	StringTie	CDS	5809584	5809846	1000	+	.	ID=Osjap06g08210;Parent=Osjap06g08210.1
chr06	StringTie	CDS	5810690	5810794	1000	+	.	ID=Osjap06g08210;Parent=Osjap06g08210.1
chr06	StringTie	CDS	5813514	5814518	1000	+	.	ID=Osjap06g08210;Parent=Osjap06g08210.1
chr06	StringTie	transcript	12050869	12058674	1000	-	.	ID=Osjap06g14300;Name=Osjap06g14300.1
chr06	StringTie	CDS	12050869	12052686	1000	-	.	ID=Osjap06g14300;Parent=Osjap06g14300.1
chr06	StringTie	CDS	12052864	12053626	1000	-	.	ID=Osjap06g14300;Parent=Osjap06g14300.1
chr06	StringTie	CDS	12054687	12054694	1000	-	.	ID=Osjap06g14300;Parent=Osjap06g14300.1
chr06	StringTie	CDS	12055723	12056111	1000	-	.	ID=Osjap06g14300;Parent=Osjap06g14300.1
chr06	StringTie	CDS	12056196	12058674	1000	-	.	ID=Osjap06g14300;Parent=Osjap06g14300.1
chr07	StringTie	transcript	4585492	4589287	1000	+	.	ID=Osjap07g06350;Name=Osjap07g06350.1
chr07	StringTie	CDS	4585492	4585607	1000	+	.	ID=Osjap07g06350;Parent=Osjap07g06350.1
chr07	StringTie	CDS	4585738	4585958	1000	+	.	ID=Osjap07g06350;Parent=Osjap07g06350.1
chr07	StringTie	CDS	4586076	4586342	1000	+	.	ID=Osjap07g06350;Parent=Osjap07g06350.1
chr07	StringTie	CDS	4588429	4588502	1000	+	.	ID=Osjap07g06350;Parent=Osjap07g06350.1
chr07	StringTie	CDS	4588703	4588869	1000	+	.	ID=Osjap07g06350;Parent=Osjap07g06350.1
chr07	StringTie	CDS	4588899	4589028	1000	+	.	ID=Osjap07g06350;Parent=Osjap07g06350.1
chr07	StringTie	CDS	4589225	4589287	1000	+	.	ID=Osjap07g06350;Parent=Osjap07g06350.1
chr07	StringTie	transcript	25214648	25223053	1000	-	.	ID=Osjap07g25530;Name=Osjap07g25530.1
chr07	StringTie	CDS	25214648	25214777	1000	-	.	ID=Osjap07g25530;Parent=Osjap07g25530.1
chr07	StringTie	CDS	25214931	25214998	1000	-	.	ID=Osjap07g25530;Parent=Osjap07g25530.1
chr07	StringTie	CDS	25215095	25215190	1000	-	.	ID=Osjap07g25530;Parent=Osjap07g25530.1
chr07	StringTie	CDS	25215944	25216625	1000	-	.	ID=Osjap07g25530;Parent=Osjap07g25530.1
chr07	StringTie	CDS	25220203	25220381	1000	-	.	ID=Osjap07g25530;Parent=Osjap07g25530.1
chr07	StringTie	CDS	25222739	25223053	1000	-	.	ID=Osjap07g25530;Parent=Osjap07g25530.1
chr08	StringTie	transcript	4440181	4447209	1000	+	.	ID=Osjap08g04940;Name=Osjap08g04940.1
chr08	StringTie	CDS	4440181	4440841	1000	+	.	ID=Osjap08g04940;Parent=Osjap08g04940.1
chr08	StringTie	CDS	4440908	4440980	1000	+	.	ID=Osjap08g04940;Parent=Osjap08g04940.1
chr08	StringTie	CDS	4441752	4443711	1000	+	.	ID=Osjap08g04940;Parent=Osjap08g04940.1
chr08	StringTie	CDS	4444065	4444425	1000	+	.	ID=Osjap08g04940;Parent=Osjap08g04940.1
chr08	StringTie	CDS	4444555	4444949	1000	+	.	ID=Osjap08g04940;Parent=Osjap08g04940.1
chr08	StringTie	CDS	4445116	4445387	1000	+	.	ID=Osjap08g04940;Parent=Osjap08g04940.1
chr08	StringTie	CDS	4445470	4445618	1000	+	.	ID=Osjap08g04940;Parent=Osjap08g04940.1
chr08	StringTie	CDS	4445683	4445814	1000	+	.	ID=Osjap08g04940;Parent=Osjap08g04940.1
chr08	StringTie	CDS	4445898	4446224	1000	+	.	ID=Osjap08g04940;Parent=Osjap08g04940.1
chr08	StringTie	CDS	4446307	4446701	1000	+	.	ID=Osjap08g04940;Parent=Osjap08g04940.1
chr08	StringTie	CDS	4446895	4447209	1000	+	.	ID=Osjap08g04940;Parent=Osjap08g04940.1
chr08	StringTie	transcript	26264010	26273155	1000	-	.	ID=Osjap08g22730;Name=Osjap08g22730.1
chr08	StringTie	CDS	26264010	26264241	1000	-	.	ID=Osjap08g22730;Parent=Osjap08g22730.1
chr08	StringTie	CDS	26265347	26266016	1000	-	.	ID=Osjap08g22730;Parent=Osjap08g22730.1
chr08	StringTie	CDS	26266515	26267797	1000	-	.	ID=Osjap08g22730;Parent=Osjap08g22730.1
chr08	StringTie	CDS	26267949	26268084	1000	-	.	ID=Osjap08g22730;Parent=Osjap08g22730.1
chr08	StringTie	CDS	26269598	26270660	1000	-	.	ID=Osjap08g22730;Parent=Osjap08g22730.1
chr08	StringTie	CDS	26272746	26272888	1000	-	.	ID=Osjap08g22730;Parent=Osjap08g22730.1
chr08	StringTie	CDS	26273002	26273155	1000	-	.	ID=Osjap08g22730;Parent=Osjap08g22730.1
chr09	StringTie	transcript	6373386	6376174	1000	-	.	ID=Osjap09g03990;Name=Osjap09g03990.5
chr09	StringTie	CDS	6373386	6373428	1000	-	.	ID=Osjap09g03990;Parent=Osjap09g03990.5
chr09	StringTie	CDS	6373552	6373740	1000	-	.	ID=Osjap09g03990;Parent=Osjap09g03990.5
chr09	StringTie	CDS	6373838	6373941	1000	-	.	ID=Osjap09g03990;Parent=Osjap09g03990.5
chr09	StringTie	CDS	6375006	6375081	1000	-	.	ID=Osjap09g03990;Parent=Osjap09g03990.5
chr09	StringTie	CDS	6375165	6375262	1000	-	.	ID=Osjap09g03990;Parent=Osjap09g03990.5
chr09	StringTie	CDS	6375572	6375649	1000	-	.	ID=Osjap09g03990;Parent=Osjap09g03990.5
chr09	StringTie	CDS	6376079	6376174	1000	-	.	ID=Osjap09g03990;Parent=Osjap09g03990.5
chr10	StringTie	transcript	5647787	5651168	1000	-	.	ID=Osjap10g04950;Name=Osjap10g04950.1
chr10	StringTie	CDS	5647787	5647891	1000	-	.	ID=Osjap10g04950;Parent=Osjap10g04950.1
chr10	StringTie	CDS	5648054	5648147	1000	-	.	ID=Osjap10g04950;Parent=Osjap10g04950.1
chr10	StringTie	CDS	5651074	5651168	1000	-	.	ID=Osjap10g04950;Parent=Osjap10g04950.1
chr11	StringTie	transcript	362997	369804	1000	-	.	ID=Osjap11g00600;Name=Osjap11g00600.1
chr11	StringTie	CDS	362997	363218	1000	-	.	ID=Osjap11g00600;Parent=Osjap11g00600.1
chr11	StringTie	CDS	363319	363410	1000	-	.	ID=Osjap11g00600;Parent=Osjap11g00600.1
chr11	StringTie	CDS	363497	363606	1000	-	.	ID=Osjap11g00600;Parent=Osjap11g00600.1
chr11	StringTie	CDS	364248	365088	1000	-	.	ID=Osjap11g00600;Parent=Osjap11g00600.1
chr11	StringTie	CDS	369543	369804	1000	-	.	ID=Osjap11g00600;Parent=Osjap11g00600.1
chr11	StringTie	transcript	2097763	2106719	1000	+	.	ID=Osjap11g03190;Name=Osjap11g03190.1
chr11	StringTie	CDS	2097763	2097909	1000	+	.	ID=Osjap11g03190;Parent=Osjap11g03190.1
chr11	StringTie	CDS	2098821	2098913	1000	+	.	ID=Osjap11g03190;Parent=Osjap11g03190.1
chr11	StringTie	CDS	2099003	2099164	1000	+	.	ID=Osjap11g03190;Parent=Osjap11g03190.1
chr11	StringTie	CDS	2099398	2099451	1000	+	.	ID=Osjap11g03190;Parent=Osjap11g03190.1
chr11	StringTie	CDS	2099611	2099742	1000	+	.	ID=Osjap11g03190;Parent=Osjap11g03190.1
chr11	StringTie	CDS	2100715	2100737	1000	+	.	ID=Osjap11g03190;Parent=Osjap11g03190.1
chr11	StringTie	CDS	2103900	2104888	1000	+	.	ID=Osjap11g03190;Parent=Osjap11g03190.1
chr11	StringTie	CDS	2106436	2106719	1000	+	.	ID=Osjap11g03190;Parent=Osjap11g03190.1
chr11	StringTie	transcript	22534272	22539845	1000	+	.	ID=Osjap11g21440;Name=Osjap11g21440.1
chr11	StringTie	CDS	22534272	22534427	1000	+	.	ID=Osjap11g21440;Parent=Osjap11g21440.1
chr11	StringTie	CDS	22534485	22535176	1000	+	.	ID=Osjap11g21440;Parent=Osjap11g21440.1
chr11	StringTie	CDS	22535432	22535759	1000	+	.	ID=Osjap11g21440;Parent=Osjap11g21440.1
chr11	StringTie	CDS	22535980	22536836	1000	+	.	ID=Osjap11g21440;Parent=Osjap11g21440.1
chr11	StringTie	CDS	22536963	22537413	1000	+	.	ID=Osjap11g21440;Parent=Osjap11g21440.1
chr11	StringTie	CDS	22537796	22538101	1000	+	.	ID=Osjap11g21440;Parent=Osjap11g21440.1
chr11	StringTie	CDS	22538171	22538491	1000	+	.	ID=Osjap11g21440;Parent=Osjap11g21440.1
chr11	StringTie	CDS	22538574	22538780	1000	+	.	ID=Osjap11g21440;Parent=Osjap11g21440.1
chr11	StringTie	CDS	22539603	22539845	1000	+	.	ID=Osjap11g21440;Parent=Osjap11g21440.1
chr11	StringTie	transcript	26057509	26091123	1000	-	.	ID=Osjap11g25180;Name=Osjap11g25180.1
chr11	StringTie	CDS	26057509	26057676	1000	-	.	ID=Osjap11g25180;Parent=Osjap11g25180.1
chr11	StringTie	CDS	26058384	26058921	1000	-	.	ID=Osjap11g25180;Parent=Osjap11g25180.1
chr11	StringTie	CDS	26058995	26059128	1000	-	.	ID=Osjap11g25180;Parent=Osjap11g25180.1
chr11	StringTie	CDS	26088607	26091123	1000	-	.	ID=Osjap11g25180;Parent=Osjap11g25180.1
chr12	StringTie	transcript	1450969	1459747	1000	+	.	ID=Osjap12g02200;Name=Osjap12g02200.1
chr12	StringTie	CDS	1450969	1451076	1000	+	.	ID=Osjap12g02200;Parent=Osjap12g02200.1
chr12	StringTie	CDS	1452061	1452234	1000	+	.	ID=Osjap12g02200;Parent=Osjap12g02200.1
chr12	StringTie	CDS	1452257	1452444	1000	+	.	ID=Osjap12g02200;Parent=Osjap12g02200.1
chr12	StringTie	CDS	1454036	1454479	1000	+	.	ID=Osjap12g02200;Parent=Osjap12g02200.1
chr12	StringTie	CDS	1454570	1455137	1000	+	.	ID=Osjap12g02200;Parent=Osjap12g02200.1
chr12	StringTie	CDS	1455655	1455787	1000	+	.	ID=Osjap12g02200;Parent=Osjap12g02200.1
chr12	StringTie	CDS	1455954	1456237	1000	+	.	ID=Osjap12g02200;Parent=Osjap12g02200.1
chr12	StringTie	CDS	1456331	1456385	1000	+	.	ID=Osjap12g02200;Parent=Osjap12g02200.1
chr12	StringTie	CDS	1457274	1457669	1000	+	.	ID=Osjap12g02200;Parent=Osjap12g02200.1
chr12	StringTie	CDS	1457931	1459747	1000	+	.	ID=Osjap12g02200;Parent=Osjap12g02200.1
chr12	StringTie	transcript	5102920	5105284	1000	-	.	ID=Osjap12g06950;Name=Osjap12g06950.3
chr12	StringTie	CDS	5102920	5103031	1000	-	.	ID=Osjap12g06950;Parent=Osjap12g06950.3
chr12	StringTie	CDS	5103055	5103321	1000	-	.	ID=Osjap12g06950;Parent=Osjap12g06950.3
chr12	StringTie	CDS	5103980	5104526	1000	-	.	ID=Osjap12g06950;Parent=Osjap12g06950.3
chr12	StringTie	CDS	5104596	5104739	1000	-	.	ID=Osjap12g06950;Parent=Osjap12g06950.3
chr12	StringTie	CDS	5104814	5105054	1000	-	.	ID=Osjap12g06950;Parent=Osjap12g06950.3
chr12	StringTie	CDS	5105195	5105284	1000	-	.	ID=Osjap12g06950;Parent=Osjap12g06950.3
chr12	StringTie	transcript	26669193	26677374	1000	+	.	ID=Osjap12g24450;Name=Osjap12g24450.1
chr12	StringTie	CDS	26669193	26670914	1000	+	.	ID=Osjap12g24450;Parent=Osjap12g24450.1
chr12	StringTie	CDS	26672422	26673596	1000	+	.	ID=Osjap12g24450;Parent=Osjap12g24450.1
chr12	StringTie	CDS	26677356	26677374	1000	+	.	ID=Osjap12g24450;Parent=Osjap12g24450.1
chr01	blat	transcript	422599	448916	1	+	.	ID=Osjap01g00640;Name=Osjap01g00640.1
chr01	blat	CDS	422599	422748	150	+	.	Parent=Osjap01g00640.1
chr01	blat	CDS	422910	422972	63	+	.	Parent=Osjap01g00640.1
chr01	blat	CDS	423069	423379	311	+	.	Parent=Osjap01g00640.1
chr01	blat	CDS	423524	423620	97	+	.	Parent=Osjap01g00640.1
chr01	blat	CDS	423697	423774	78	+	.	Parent=Osjap01g00640.1
chr01	blat	CDS	423871	423930	60	+	.	Parent=Osjap01g00640.1
chr01	blat	CDS	424019	424123	105	+	.	Parent=Osjap01g00640.1
chr01	blat	CDS	424743	424856	114	+	.	Parent=Osjap01g00640.1
chr01	blat	CDS	425145	425186	42	+	.	Parent=Osjap01g00640.1
chr01	blat	CDS	425380	425487	108	+	.	Parent=Osjap01g00640.1
chr01	blat	CDS	425568	425755	188	+	.	Parent=Osjap01g00640.1
chr01	blat	CDS	426514	426785	272	+	.	Parent=Osjap01g00640.1
chr01	blat	CDS	426869	426990	122	+	.	Parent=Osjap01g00640.1
chr01	blat	CDS	427118	427160	43	+	.	Parent=Osjap01g00640.1
chr01	blat	CDS	427265	427356	92	+	.	Parent=Osjap01g00640.1
chr01	blat	CDS	428331	428379	49	+	.	Parent=Osjap01g00640.1
chr01	blat	CDS	428623	428693	71	+	.	Parent=Osjap01g00640.1
chr01	blat	CDS	428793	428912	120	+	.	Parent=Osjap01g00640.1
chr01	blat	CDS	429586	429674	89	+	.	Parent=Osjap01g00640.1
chr01	blat	CDS	430266	430311	46	+	.	Parent=Osjap01g00640.1
chr01	blat	CDS	430926	430969	44	+	.	Parent=Osjap01g00640.1
chr01	blat	CDS	431165	431198	34	+	.	Parent=Osjap01g00640.1
chr01	blat	CDS	437647	437862	216	+	.	Parent=Osjap01g00640.1
chr01	blat	CDS	437897	438063	167	+	.	Parent=Osjap01g00640.1
chr01	blat	CDS	438679	438774	96	+	.	Parent=Osjap01g00640.1
chr01	blat	CDS	441273	441437	165	+	.	Parent=Osjap01g00640.1
chr01	blat	CDS	441514	441733	220	+	.	Parent=Osjap01g00640.1
chr01	blat	CDS	442605	442805	201	+	.	Parent=Osjap01g00640.1
chr01	blat	CDS	442915	442985	71	+	.	Parent=Osjap01g00640.1
chr01	blat	CDS	443058	443217	160	+	.	Parent=Osjap01g00640.1
chr01	blat	CDS	445166	445759	594	+	.	Parent=Osjap01g00640.1
chr01	blat	CDS	445869	446249	381	+	.	Parent=Osjap01g00640.1
chr01	blat	CDS	446573	446648	76	+	.	Parent=Osjap01g00640.1
chr01	blat	CDS	446736	446799	64	+	.	Parent=Osjap01g00640.1
chr01	blat	CDS	447334	447469	136	+	.	Parent=Osjap01g00640.1
chr01	blat	CDS	448666	448779	114	+	.	Parent=Osjap01g00640.1
chr01	blat	CDS	448851	448916	66	+	.	Parent=Osjap01g00640.1
chr01	blat	transcript	3976499	3994976	1	+	.	ID=Osjap01g05660;Name=Osjap01g05660.1
chr01	blat	CDS	3976500	3976546	47	+	.	Parent=Osjap01g05660.1
chr01	blat	CDS	3977273	3977370	98	+	.	Parent=Osjap01g05660.1
chr01	blat	CDS	3977721	3977830	110	+	.	Parent=Osjap01g05660.1
chr01	blat	CDS	3978518	3978871	354	+	.	Parent=Osjap01g05660.1
chr01	blat	CDS	3978953	3979041	89	+	.	Parent=Osjap01g05660.1
chr01	blat	CDS	3979502	3979589	88	+	.	Parent=Osjap01g05660.1
chr01	blat	CDS	3979659	3979734	76	+	.	Parent=Osjap01g05660.1
chr01	blat	CDS	3979858	3979907	50	+	.	Parent=Osjap01g05660.1
chr01	blat	CDS	3980032	3980340	309	+	.	Parent=Osjap01g05660.1
chr01	blat	CDS	3980803	3980982	180	+	.	Parent=Osjap01g05660.1
chr01	blat	CDS	3981086	3981325	240	+	.	Parent=Osjap01g05660.1
chr01	blat	CDS	3981471	3981582	112	+	.	Parent=Osjap01g05660.1
chr01	blat	CDS	3981931	3982040	110	+	.	Parent=Osjap01g05660.1
chr01	blat	CDS	3982162	3982311	150	+	.	Parent=Osjap01g05660.1
chr01	blat	CDS	3982777	3982932	156	+	.	Parent=Osjap01g05660.1
chr01	blat	CDS	3983289	3983405	117	+	.	Parent=Osjap01g05660.1
chr01	blat	CDS	3983759	3983839	81	+	.	Parent=Osjap01g05660.1
chr01	blat	CDS	3984338	3984456	119	+	.	Parent=Osjap01g05660.1
chr01	blat	CDS	3985299	3985309	11	+	.	Parent=Osjap01g05660.1
chr01	blat	CDS	3986721	3986866	146	+	.	Parent=Osjap01g05660.1
chr01	blat	CDS	3986965	3987145	181	+	.	Parent=Osjap01g05660.1
chr01	blat	CDS	3987668	3987780	113	+	.	Parent=Osjap01g05660.1
chr01	blat	CDS	3987854	3988190	337	+	.	Parent=Osjap01g05660.1
chr01	blat	CDS	3989022	3989116	95	+	.	Parent=Osjap01g05660.1
chr01	blat	CDS	3989330	3989463	134	+	.	Parent=Osjap01g05660.1
chr01	blat	CDS	3989711	3989788	78	+	.	Parent=Osjap01g05660.1
chr01	blat	CDS	3990333	3990387	55	+	.	Parent=Osjap01g05660.1
chr01	blat	CDS	3991159	3991239	81	+	.	Parent=Osjap01g05660.1
chr01	blat	CDS	3991369	3991567	199	+	.	Parent=Osjap01g05660.1
chr01	blat	CDS	3991642	3991699	58	+	.	Parent=Osjap01g05660.1
chr01	blat	CDS	3991770	3991892	123	+	.	Parent=Osjap01g05660.1
chr01	blat	CDS	3992440	3992528	89	+	.	Parent=Osjap01g05660.1
chr01	blat	CDS	3993450	3993539	90	+	.	Parent=Osjap01g05660.1
chr01	blat	CDS	3993619	3993792	174	+	.	Parent=Osjap01g05660.1
chr01	blat	CDS	3993911	3994035	125	+	.	Parent=Osjap01g05660.1
chr01	blat	CDS	3994246	3994372	127	+	.	Parent=Osjap01g05660.1
chr01	blat	CDS	3994826	3994976	151	+	.	Parent=Osjap01g05660.1
chr01	blat	transcript	4732051	4744381	1	-	.	ID=Osjap01g06620;Name=Osjap01g06620.1
chr01	blat	CDS	4732052	4732601	550	-	.	Parent=Osjap01g06620.1
chr01	blat	CDS	4732825	4733207	383	-	.	Parent=Osjap01g06620.1
chr01	blat	CDS	4733370	4733972	603	-	.	Parent=Osjap01g06620.1
chr01	blat	CDS	4734090	4734763	674	-	.	Parent=Osjap01g06620.1
chr01	blat	CDS	4734845	4734953	109	-	.	Parent=Osjap01g06620.1
chr01	blat	CDS	4735038	4735241	204	-	.	Parent=Osjap01g06620.1
chr01	blat	CDS	4735695	4735802	108	-	.	Parent=Osjap01g06620.1
chr01	blat	CDS	4736638	4736841	204	-	.	Parent=Osjap01g06620.1
chr01	blat	CDS	4736930	4737369	440	-	.	Parent=Osjap01g06620.1
chr01	blat	CDS	4737463	4737578	116	-	.	Parent=Osjap01g06620.1
chr01	blat	CDS	4738454	4738533	80	-	.	Parent=Osjap01g06620.1
chr01	blat	CDS	4739290	4739473	184	-	.	Parent=Osjap01g06620.1
chr01	blat	CDS	4739523	4739607	85	-	.	Parent=Osjap01g06620.1
chr01	blat	CDS	4739700	4739828	129	-	.	Parent=Osjap01g06620.1
chr01	blat	CDS	4739921	4740011	91	-	.	Parent=Osjap01g06620.1
chr01	blat	CDS	4740103	4740177	75	-	.	Parent=Osjap01g06620.1
chr01	blat	CDS	4740360	4740437	78	-	.	Parent=Osjap01g06620.1
chr01	blat	CDS	4740529	4740618	90	-	.	Parent=Osjap01g06620.1
chr01	blat	CDS	4740742	4740840	99	-	.	Parent=Osjap01g06620.1
chr01	blat	CDS	4740934	4740987	54	-	.	Parent=Osjap01g06620.1
chr01	blat	CDS	4741084	4741131	48	-	.	Parent=Osjap01g06620.1
chr01	blat	CDS	4741232	4741330	99	-	.	Parent=Osjap01g06620.1
chr01	blat	CDS	4741458	4741541	84	-	.	Parent=Osjap01g06620.1
chr01	blat	CDS	4741650	4741721	72	-	.	Parent=Osjap01g06620.1
chr01	blat	CDS	4741812	4741907	96	-	.	Parent=Osjap01g06620.1
chr01	blat	CDS	4742012	4742077	66	-	.	Parent=Osjap01g06620.1
chr01	blat	CDS	4742148	4742253	106	-	.	Parent=Osjap01g06620.1
chr01	blat	CDS	4742350	4742501	152	-	.	Parent=Osjap01g06620.1
chr01	blat	CDS	4742634	4742708	75	-	.	Parent=Osjap01g06620.1
chr01	blat	CDS	4742792	4742912	121	-	.	Parent=Osjap01g06620.1
chr01	blat	CDS	4743968	4744209	242	-	.	Parent=Osjap01g06620.1
chr01	blat	CDS	4744328	4744381	54	-	.	Parent=Osjap01g06620.1
chr01	blat	transcript	27271731	27278175	1	-	.	ID=Osjap01g30020;Name=Osjap01g30020.1
chr01	blat	CDS	27271732	27271791	60	-	.	Parent=Osjap01g30020.1
chr01	blat	CDS	27272273	27272390	118	-	.	Parent=Osjap01g30020.1
chr01	blat	CDS	27272475	27272553	79	-	.	Parent=Osjap01g30020.1
chr01	blat	CDS	27273558	27273953	396	-	.	Parent=Osjap01g30020.1
chr01	blat	CDS	27274011	27274029	19	-	.	Parent=Osjap01g30020.1
chr01	blat	CDS	27274938	27275023	86	-	.	Parent=Osjap01g30020.1
chr01	blat	CDS	27275196	27275220	25	-	.	Parent=Osjap01g30020.1
chr01	blat	CDS	27275310	27275363	54	-	.	Parent=Osjap01g30020.1
chr01	blat	CDS	27275430	27275489	60	-	.	Parent=Osjap01g30020.1
chr01	blat	CDS	27275663	27275692	30	-	.	Parent=Osjap01g30020.1
chr01	blat	CDS	27275908	27276042	135	-	.	Parent=Osjap01g30020.1
chr01	blat	CDS	27276848	27276955	108	-	.	Parent=Osjap01g30020.1
chr01	blat	CDS	27277072	27277200	129	-	.	Parent=Osjap01g30020.1
chr01	blat	CDS	27277903	27278175	273	-	.	Parent=Osjap01g30020.1
chr01	blat	transcript	28524096	28537987	1	+	.	ID=Osjap01g31520;Name=Osjap01g31520.1
chr01	blat	CDS	28524097	28525009	913	+	.	Parent=Osjap01g31520.1
chr01	blat	CDS	28526424	28526700	277	+	.	Parent=Osjap01g31520.1
chr01	blat	CDS	28526833	28526944	112	+	.	Parent=Osjap01g31520.1
chr01	blat	CDS	28526978	28527142	165	+	.	Parent=Osjap01g31520.1
chr01	blat	CDS	28529645	28530279	635	+	.	Parent=Osjap01g31520.1
chr01	blat	CDS	28531778	28531810	33	+	.	Parent=Osjap01g31520.1
chr01	blat	CDS	28532699	28532958	260	+	.	Parent=Osjap01g31520.1
chr01	blat	CDS	28533136	28533416	281	+	.	Parent=Osjap01g31520.1
chr01	blat	CDS	28535108	28536107	1000	+	.	Parent=Osjap01g31520.1
chr01	blat	CDS	28536198	28536223	26	+	.	Parent=Osjap01g31520.1
chr01	blat	CDS	28536247	28536282	36	+	.	Parent=Osjap01g31520.1
chr01	blat	CDS	28537940	28537987	48	+	.	Parent=Osjap01g31520.1
chr01	blat	transcript	42178023	42187395	1	+	.	ID=Osjap01g50410;Name=Osjap01g50410.1
chr01	blat	CDS	42178024	42178050	27	+	.	Parent=Osjap01g50410.1
chr01	blat	CDS	42178174	42178290	117	+	.	Parent=Osjap01g50410.1
chr01	blat	CDS	42179572	42179761	190	+	.	Parent=Osjap01g50410.1
chr01	blat	CDS	42179892	42180011	120	+	.	Parent=Osjap01g50410.1
chr01	blat	CDS	42180090	42180382	293	+	.	Parent=Osjap01g50410.1
chr01	blat	CDS	42180514	42180608	95	+	.	Parent=Osjap01g50410.1
chr01	blat	CDS	42180717	42180823	107	+	.	Parent=Osjap01g50410.1
chr01	blat	CDS	42181464	42181537	74	+	.	Parent=Osjap01g50410.1
chr01	blat	CDS	42182010	42182088	79	+	.	Parent=Osjap01g50410.1
chr01	blat	CDS	42182301	42182608	308	+	.	Parent=Osjap01g50410.1
chr01	blat	CDS	42182994	42183291	298	+	.	Parent=Osjap01g50410.1
chr01	blat	CDS	42183914	42185759	1846	+	.	Parent=Osjap01g50410.1
chr01	blat	CDS	42185874	42187395	1522	+	.	Parent=Osjap01g50410.1
chr02	blat	transcript	2838472	2848544	1	+	.	ID=Osjap02g04220;Name=Osjap02g04220.4
chr02	blat	CDS	2838473	2838566	94	+	.	Parent=Osjap02g04220.4
chr02	blat	CDS	2838654	2838796	143	+	.	Parent=Osjap02g04220.4
chr02	blat	CDS	2838894	2839030	137	+	.	Parent=Osjap02g04220.4
chr02	blat	CDS	2841157	2841633	477	+	.	Parent=Osjap02g04220.4
chr02	blat	CDS	2841721	2841946	226	+	.	Parent=Osjap02g04220.4
chr02	blat	CDS	2842832	2842983	152	+	.	Parent=Osjap02g04220.4
chr02	blat	CDS	2844096	2844150	55	+	.	Parent=Osjap02g04220.4
chr02	blat	CDS	2846576	2846623	48	+	.	Parent=Osjap02g04220.4
chr02	blat	CDS	2846887	2846952	66	+	.	Parent=Osjap02g04220.4
chr02	blat	CDS	2847288	2847398	111	+	.	Parent=Osjap02g04220.4
chr02	blat	CDS	2847658	2847766	109	+	.	Parent=Osjap02g04220.4
chr02	blat	CDS	2847878	2847943	66	+	.	Parent=Osjap02g04220.4
chr02	blat	CDS	2848428	2848544	117	+	.	Parent=Osjap02g04220.4
chr02	blat	transcript	13116082	13126766	1	-	.	ID=Osjap02g16210;Name=Osjap02g16210.1
chr02	blat	CDS	13116083	13116168	86	-	.	Parent=Osjap02g16210.1
chr02	blat	CDS	13116705	13116776	72	-	.	Parent=Osjap02g16210.1
chr02	blat	CDS	13116878	13116951	74	-	.	Parent=Osjap02g16210.1
chr02	blat	CDS	13117085	13117182	98	-	.	Parent=Osjap02g16210.1
chr02	blat	CDS	13117243	13117290	48	-	.	Parent=Osjap02g16210.1
chr02	blat	CDS	13120397	13120498	102	-	.	Parent=Osjap02g16210.1
chr02	blat	CDS	13120577	13120648	72	-	.	Parent=Osjap02g16210.1
chr02	blat	CDS	13123141	13123183	43	-	.	Parent=Osjap02g16210.1
chr02	blat	CDS	13123363	13123406	44	-	.	Parent=Osjap02g16210.1
chr02	blat	CDS	13126213	13126293	81	-	.	Parent=Osjap02g16210.1
chr02	blat	CDS	13126443	13126766	324	-	.	Parent=Osjap02g16210.1
chr02	blat	transcript	17245266	17275865	1	-	.	ID=Osjap02g19520;Name=Osjap02g19520.2
chr02	blat	CDS	17245267	17245306	40	-	.	Parent=Osjap02g19520.2
chr02	blat	CDS	17245550	17245629	80	-	.	Parent=Osjap02g19520.2
chr02	blat	CDS	17245730	17245900	171	-	.	Parent=Osjap02g19520.2
chr02	blat	CDS	17247399	17247500	102	-	.	Parent=Osjap02g19520.2
chr02	blat	CDS	17249030	17249173	144	-	.	Parent=Osjap02g19520.2
chr02	blat	CDS	17250446	17250568	123	-	.	Parent=Osjap02g19520.2
chr02	blat	CDS	17250719	17250805	87	-	.	Parent=Osjap02g19520.2
chr02	blat	CDS	17252442	17252581	140	-	.	Parent=Osjap02g19520.2
chr02	blat	CDS	17253698	17253829	132	-	.	Parent=Osjap02g19520.2
chr02	blat	CDS	17254310	17254480	171	-	.	Parent=Osjap02g19520.2
chr02	blat	CDS	17254649	17254714	66	-	.	Parent=Osjap02g19520.2
chr02	blat	CDS	17258388	17258431	44	-	.	Parent=Osjap02g19520.2
chr02	blat	CDS	17258680	17258759	80	-	.	Parent=Osjap02g19520.2
chr02	blat	CDS	17258845	17259015	171	-	.	Parent=Osjap02g19520.2
chr02	blat	CDS	17259658	17259759	102	-	.	Parent=Osjap02g19520.2
chr02	blat	CDS	17260434	17260583	150	-	.	Parent=Osjap02g19520.2
chr02	blat	CDS	17260767	17260889	123	-	.	Parent=Osjap02g19520.2
chr02	blat	CDS	17260999	17261085	87	-	.	Parent=Osjap02g19520.2
chr02	blat	CDS	17262289	17262428	140	-	.	Parent=Osjap02g19520.2
chr02	blat	CDS	17263684	17263752	69	-	.	Parent=Osjap02g19520.2
chr02	blat	CDS	17265533	17265703	171	-	.	Parent=Osjap02g19520.2
chr02	blat	CDS	17265837	17265902	66	-	.	Parent=Osjap02g19520.2
chr02	blat	CDS	17266002	17266094	93	-	.	Parent=Osjap02g19520.2
chr02	blat	CDS	17271464	17271510	47	-	.	Parent=Osjap02g19520.2
chr02	blat	CDS	17271623	17271667	45	-	.	Parent=Osjap02g19520.2
chr02	blat	CDS	17272356	17272435	80	-	.	Parent=Osjap02g19520.2
chr02	blat	CDS	17272519	17272689	171	-	.	Parent=Osjap02g19520.2
chr02	blat	CDS	17273552	17273653	102	-	.	Parent=Osjap02g19520.2
chr02	blat	CDS	17274021	17274434	414	-	.	Parent=Osjap02g19520.2
chr02	blat	CDS	17274587	17274730	144	-	.	Parent=Osjap02g19520.2
chr02	blat	CDS	17274852	17275865	1014	-	.	Parent=Osjap02g19520.2
chr02	blat	transcript	20957332	20966554	1	-	.	ID=Osjap02g23220;Name=Osjap02g23220.1
chr02	blat	CDS	20957333	20957350	18	-	.	Parent=Osjap02g23220.1
chr02	blat	CDS	20957426	20957444	19	-	.	Parent=Osjap02g23220.1
chr02	blat	CDS	20957587	20957777	191	-	.	Parent=Osjap02g23220.1
chr02	blat	CDS	20958105	20958217	113	-	.	Parent=Osjap02g23220.1
chr02	blat	CDS	20958647	20958707	61	-	.	Parent=Osjap02g23220.1
chr02	blat	CDS	20959191	20959307	117	-	.	Parent=Osjap02g23220.1
chr02	blat	CDS	20959442	20959579	138	-	.	Parent=Osjap02g23220.1
chr02	blat	CDS	20959799	20959924	126	-	.	Parent=Osjap02g23220.1
chr02	blat	CDS	20960445	20960621	177	-	.	Parent=Osjap02g23220.1
chr02	blat	CDS	20961145	20961469	325	-	.	Parent=Osjap02g23220.1
chr02	blat	CDS	20961583	20961940	358	-	.	Parent=Osjap02g23220.1
chr02	blat	CDS	20963879	20963969	91	-	.	Parent=Osjap02g23220.1
chr02	blat	CDS	20964046	20964118	73	-	.	Parent=Osjap02g23220.1
chr02	blat	CDS	20964678	20964765	88	-	.	Parent=Osjap02g23220.1
chr02	blat	CDS	20964838	20964994	157	-	.	Parent=Osjap02g23220.1
chr02	blat	CDS	20965078	20965181	104	-	.	Parent=Osjap02g23220.1
chr02	blat	CDS	20965651	20965725	75	-	.	Parent=Osjap02g23220.1
chr02	blat	CDS	20965814	20965893	80	-	.	Parent=Osjap02g23220.1
chr02	blat	CDS	20966010	20966054	45	-	.	Parent=Osjap02g23220.1
chr02	blat	CDS	20966463	20966554	92	-	.	Parent=Osjap02g23220.1
chr02	blat	transcript	25566196	25574706	1	-	.	ID=Osjap02g28800;Name=Osjap02g28800.3
chr02	blat	CDS	25566197	25566313	117	-	.	Parent=Osjap02g28800.3
chr02	blat	CDS	25566658	25566819	162	-	.	Parent=Osjap02g28800.3
chr02	blat	CDS	25566903	25566998	96	-	.	Parent=Osjap02g28800.3
chr02	blat	CDS	25567401	25567462	62	-	.	Parent=Osjap02g28800.3
chr02	blat	CDS	25567542	25567617	76	-	.	Parent=Osjap02g28800.3
chr02	blat	CDS	25567702	25567784	83	-	.	Parent=Osjap02g28800.3
chr02	blat	CDS	25567963	25568146	184	-	.	Parent=Osjap02g28800.3
chr02	blat	CDS	25568521	25568657	137	-	.	Parent=Osjap02g28800.3
chr02	blat	CDS	25568757	25568829	73	-	.	Parent=Osjap02g28800.3
chr02	blat	CDS	25569573	25569758	186	-	.	Parent=Osjap02g28800.3
chr02	blat	CDS	25570050	25570293	244	-	.	Parent=Osjap02g28800.3
chr02	blat	CDS	25570376	25570488	113	-	.	Parent=Osjap02g28800.3
chr02	blat	CDS	25570688	25571197	510	-	.	Parent=Osjap02g28800.3
chr02	blat	CDS	25571207	25571285	79	-	.	Parent=Osjap02g28800.3
chr02	blat	CDS	25571395	25571471	77	-	.	Parent=Osjap02g28800.3
chr02	blat	CDS	25571505	25571572	68	-	.	Parent=Osjap02g28800.3
chr02	blat	CDS	25571661	25571803	143	-	.	Parent=Osjap02g28800.3
chr02	blat	CDS	25572220	25572389	170	-	.	Parent=Osjap02g28800.3
chr02	blat	CDS	25572752	25572992	241	-	.	Parent=Osjap02g28800.3
chr02	blat	CDS	25574504	25574706	203	-	.	Parent=Osjap02g28800.3
chr02	blat	transcript	26982478	26986903	1	-	.	ID=Osjap02g30600;Name=Osjap02g30600.1
chr02	blat	CDS	26982479	26982636	158	-	.	Parent=Osjap02g30600.1
chr02	blat	CDS	26982709	26982867	159	-	.	Parent=Osjap02g30600.1
chr02	blat	CDS	26985061	26985115	55	-	.	Parent=Osjap02g30600.1
chr02	blat	CDS	26985382	26985639	258	-	.	Parent=Osjap02g30600.1
chr02	blat	CDS	26986581	26986859	279	-	.	Parent=Osjap02g30600.1
chr02	blat	CDS	26986877	26986903	27	-	.	Parent=Osjap02g30600.1
chr02	blat	transcript	31598150	31604244	1	+	.	ID=Osjap02g36880;Name=Osjap02g36880.1
chr02	blat	CDS	31598151	31598382	232	+	.	Parent=Osjap02g36880.1
chr02	blat	CDS	31598487	31598710	224	+	.	Parent=Osjap02g36880.1
chr02	blat	CDS	31598815	31598933	119	+	.	Parent=Osjap02g36880.1
chr02	blat	CDS	31599035	31599191	157	+	.	Parent=Osjap02g36880.1
chr02	blat	CDS	31599435	31599536	102	+	.	Parent=Osjap02g36880.1
chr02	blat	CDS	31599618	31599737	120	+	.	Parent=Osjap02g36880.1
chr02	blat	CDS	31601447	31601491	45	+	.	Parent=Osjap02g36880.1
chr02	blat	CDS	31601597	31601687	91	+	.	Parent=Osjap02g36880.1
chr02	blat	CDS	31602041	31602125	85	+	.	Parent=Osjap02g36880.1
chr02	blat	CDS	31602209	31602313	105	+	.	Parent=Osjap02g36880.1
chr02	blat	CDS	31602526	31603401	876	+	.	Parent=Osjap02g36880.1
chr02	blat	CDS	31603523	31603631	109	+	.	Parent=Osjap02g36880.1
chr02	blat	CDS	31603773	31603921	149	+	.	Parent=Osjap02g36880.1
chr02	blat	CDS	31604025	31604244	220	+	.	Parent=Osjap02g36880.1
chr02	blat	transcript	33710129	33721498	1	+	.	ID=Osjap02g39740;Name=Osjap02g39740.1
chr02	blat	CDS	33710130	33710275	146	+	.	Parent=Osjap02g39740.1
chr02	blat	CDS	33710321	33710500	180	+	.	Parent=Osjap02g39740.1
chr02	blat	CDS	33710953	33711030	78	+	.	Parent=Osjap02g39740.1
chr02	blat	CDS	33711341	33711437	97	+	.	Parent=Osjap02g39740.1
chr02	blat	CDS	33711713	33711846	134	+	.	Parent=Osjap02g39740.1
chr02	blat	CDS	33712451	33712532	82	+	.	Parent=Osjap02g39740.1
chr02	blat	CDS	33713138	33713224	87	+	.	Parent=Osjap02g39740.1
chr02	blat	CDS	33713382	33713488	107	+	.	Parent=Osjap02g39740.1
chr02	blat	CDS	33714181	33714352	172	+	.	Parent=Osjap02g39740.1
chr02	blat	CDS	33714525	33714766	242	+	.	Parent=Osjap02g39740.1
chr02	blat	CDS	33714989	33715070	82	+	.	Parent=Osjap02g39740.1
chr02	blat	CDS	33715461	33715526	66	+	.	Parent=Osjap02g39740.1
chr02	blat	CDS	33716442	33716519	78	+	.	Parent=Osjap02g39740.1
chr02	blat	CDS	33716590	33716685	96	+	.	Parent=Osjap02g39740.1
chr02	blat	CDS	33717298	33717404	107	+	.	Parent=Osjap02g39740.1
chr02	blat	CDS	33717538	33717706	169	+	.	Parent=Osjap02g39740.1
chr02	blat	CDS	33717909	33717959	51	+	.	Parent=Osjap02g39740.1
chr02	blat	CDS	33718074	33718157	84	+	.	Parent=Osjap02g39740.1
chr02	blat	CDS	33718453	33718547	95	+	.	Parent=Osjap02g39740.1
chr02	blat	CDS	33718682	33718772	91	+	.	Parent=Osjap02g39740.1
chr02	blat	CDS	33718849	33718995	147	+	.	Parent=Osjap02g39740.1
chr02	blat	CDS	33719121	33719179	59	+	.	Parent=Osjap02g39740.1
chr02	blat	CDS	33720067	33721498	1432	+	.	Parent=Osjap02g39740.1
chr02	blat	transcript	34596111	34614759	1	+	.	ID=Osjap02g41000;Name=Osjap02g41000.1
chr02	blat	CDS	34596112	34596145	34	+	.	Parent=Osjap02g41000.1
chr02	blat	CDS	34596944	34596972	29	+	.	Parent=Osjap02g41000.1
chr02	blat	CDS	34596994	34597240	247	+	.	Parent=Osjap02g41000.1
chr02	blat	CDS	34597373	34597749	377	+	.	Parent=Osjap02g41000.1
chr02	blat	CDS	34597840	34598089	250	+	.	Parent=Osjap02g41000.1
chr02	blat	CDS	34598213	34598328	116	+	.	Parent=Osjap02g41000.1
chr02	blat	CDS	34598960	34599085	126	+	.	Parent=Osjap02g41000.1
chr02	blat	CDS	34599225	34599314	90	+	.	Parent=Osjap02g41000.1
chr02	blat	CDS	34599537	34599811	275	+	.	Parent=Osjap02g41000.1
chr02	blat	CDS	34609595	34609653	59	+	.	Parent=Osjap02g41000.1
chr02	blat	CDS	34609854	34610170	317	+	.	Parent=Osjap02g41000.1
chr02	blat	CDS	34610270	34610323	54	+	.	Parent=Osjap02g41000.1
chr02	blat	CDS	34610413	34610704	292	+	.	Parent=Osjap02g41000.1
chr02	blat	CDS	34610823	34611126	304	+	.	Parent=Osjap02g41000.1
chr02	blat	CDS	34611890	34611938	49	+	.	Parent=Osjap02g41000.1
chr02	blat	CDS	34612278	34612352	75	+	.	Parent=Osjap02g41000.1
chr02	blat	CDS	34612493	34612609	117	+	.	Parent=Osjap02g41000.1
chr02	blat	CDS	34612719	34612738	20	+	.	Parent=Osjap02g41000.1
chr02	blat	CDS	34613095	34613338	244	+	.	Parent=Osjap02g41000.1
chr02	blat	CDS	34613429	34613533	105	+	.	Parent=Osjap02g41000.1
chr02	blat	CDS	34613617	34613661	45	+	.	Parent=Osjap02g41000.1
chr02	blat	CDS	34613750	34613902	153	+	.	Parent=Osjap02g41000.1
chr02	blat	CDS	34613988	34614269	282	+	.	Parent=Osjap02g41000.1
chr02	blat	CDS	34614351	34614487	137	+	.	Parent=Osjap02g41000.1
chr02	blat	CDS	34614572	34614639	68	+	.	Parent=Osjap02g41000.1
chr02	blat	CDS	34614668	34614759	92	+	.	Parent=Osjap02g41000.1
chr03	blat	transcript	17714960	17740675	1	+	.	ID=Osjap03g23720;Name=Osjap03g23720.1
chr03	blat	CDS	17714961	17715050	90	+	.	Parent=Osjap03g23720.1
chr03	blat	CDS	17715859	17715949	91	+	.	Parent=Osjap03g23720.1
chr03	blat	CDS	17716095	17716278	184	+	.	Parent=Osjap03g23720.1
chr03	blat	CDS	17716357	17716417	61	+	.	Parent=Osjap03g23720.1
chr03	blat	CDS	17717285	17717379	95	+	.	Parent=Osjap03g23720.1
chr03	blat	CDS	17718558	17718625	68	+	.	Parent=Osjap03g23720.1
chr03	blat	CDS	17727054	17727187	134	+	.	Parent=Osjap03g23720.1
chr03	blat	CDS	17727996	17728086	91	+	.	Parent=Osjap03g23720.1
chr03	blat	CDS	17728232	17728415	184	+	.	Parent=Osjap03g23720.1
chr03	blat	CDS	17728500	17728560	61	+	.	Parent=Osjap03g23720.1
chr03	blat	CDS	17728982	17728995	14	+	.	Parent=Osjap03g23720.1
chr03	blat	CDS	17729345	17729394	50	+	.	Parent=Osjap03g23720.1
chr03	blat	CDS	17738182	17739966	1785	+	.	Parent=Osjap03g23720.1
chr03	blat	CDS	17740097	17740179	83	+	.	Parent=Osjap03g23720.1
chr03	blat	CDS	17740604	17740675	72	+	.	Parent=Osjap03g23720.1
chr03	blat	transcript	30115468	30123066	1	-	.	ID=Osjap03g35910;Name=Osjap03g35910.1
chr03	blat	CDS	30115469	30115786	318	-	.	Parent=Osjap03g35910.1
chr03	blat	CDS	30115803	30116971	1169	-	.	Parent=Osjap03g35910.1
chr03	blat	CDS	30119943	30120087	145	-	.	Parent=Osjap03g35910.1
chr03	blat	CDS	30120615	30120680	66	-	.	Parent=Osjap03g35910.1
chr03	blat	CDS	30120770	30121021	252	-	.	Parent=Osjap03g35910.1
chr03	blat	CDS	30121092	30121184	93	-	.	Parent=Osjap03g35910.1
chr03	blat	CDS	30121316	30121390	75	-	.	Parent=Osjap03g35910.1
chr03	blat	CDS	30121656	30121736	81	-	.	Parent=Osjap03g35910.1
chr03	blat	CDS	30122944	30123066	123	-	.	Parent=Osjap03g35910.1
chr03	blat	transcript	32626050	32632090	1	+	.	ID=Osjap03g39550;Name=Osjap03g39550.1
chr03	blat	CDS	32626051	32626291	241	+	.	Parent=Osjap03g39550.1
chr03	blat	CDS	32626368	32626639	272	+	.	Parent=Osjap03g39550.1
chr03	blat	CDS	32627170	32627262	93	+	.	Parent=Osjap03g39550.1
chr03	blat	CDS	32627341	32627530	190	+	.	Parent=Osjap03g39550.1
chr03	blat	CDS	32628796	32628894	99	+	.	Parent=Osjap03g39550.1
chr03	blat	CDS	32629490	32629649	160	+	.	Parent=Osjap03g39550.1
chr03	blat	CDS	32630140	32630264	125	+	.	Parent=Osjap03g39550.1
chr03	blat	CDS	32630505	32630551	47	+	.	Parent=Osjap03g39550.1
chr03	blat	CDS	32630684	32630761	78	+	.	Parent=Osjap03g39550.1
chr03	blat	CDS	32630858	32630982	125	+	.	Parent=Osjap03g39550.1
chr03	blat	CDS	32631086	32631152	67	+	.	Parent=Osjap03g39550.1
chr03	blat	CDS	32631251	32631313	63	+	.	Parent=Osjap03g39550.1
chr03	blat	CDS	32631437	32631506	70	+	.	Parent=Osjap03g39550.1
chr03	blat	CDS	32631606	32631811	206	+	.	Parent=Osjap03g39550.1
chr03	blat	CDS	32631902	32632090	189	+	.	Parent=Osjap03g39550.1
chr03	blat	transcript	35474092	35479796	1	+	.	ID=Osjap03g44070;Name=Osjap03g44070.1
chr03	blat	CDS	35474093	35476179	2087	+	.	Parent=Osjap03g44070.1
chr03	blat	CDS	35476386	35476498	113	+	.	Parent=Osjap03g44070.1
chr03	blat	CDS	35476721	35476822	102	+	.	Parent=Osjap03g44070.1
chr03	blat	CDS	35476916	35477049	134	+	.	Parent=Osjap03g44070.1
chr03	blat	CDS	35477130	35477399	270	+	.	Parent=Osjap03g44070.1
chr03	blat	CDS	35477580	35477758	179	+	.	Parent=Osjap03g44070.1
chr03	blat	CDS	35478044	35478090	47	+	.	Parent=Osjap03g44070.1
chr03	blat	CDS	35478267	35478356	90	+	.	Parent=Osjap03g44070.1
chr03	blat	CDS	35478458	35478589	132	+	.	Parent=Osjap03g44070.1
chr03	blat	CDS	35478701	35478726	26	+	.	Parent=Osjap03g44070.1
chr03	blat	CDS	35478747	35478824	78	+	.	Parent=Osjap03g44070.1
chr03	blat	CDS	35478909	35479184	276	+	.	Parent=Osjap03g44070.1
chr03	blat	CDS	35479275	35479408	134	+	.	Parent=Osjap03g44070.1
chr03	blat	CDS	35479490	35479573	84	+	.	Parent=Osjap03g44070.1
chr03	blat	CDS	35479679	35479796	118	+	.	Parent=Osjap03g44070.1
chr04	blat	transcript	30264299	30271391	1	+	.	ID=Osjap04g27970;Name=Osjap04g27970.1
chr04	blat	CDS	30264300	30264551	252	+	.	Parent=Osjap04g27970.1
chr04	blat	CDS	30264956	30265021	66	+	.	Parent=Osjap04g27970.1
chr04	blat	CDS	30265204	30265384	181	+	.	Parent=Osjap04g27970.1
chr04	blat	CDS	30265492	30265688	197	+	.	Parent=Osjap04g27970.1
chr04	blat	CDS	30265847	30265897	51	+	.	Parent=Osjap04g27970.1
chr04	blat	CDS	30265979	30266070	92	+	.	Parent=Osjap04g27970.1
chr04	blat	CDS	30266181	30266248	68	+	.	Parent=Osjap04g27970.1
chr04	blat	CDS	30266514	30266599	86	+	.	Parent=Osjap04g27970.1
chr04	blat	CDS	30266719	30266823	105	+	.	Parent=Osjap04g27970.1
chr04	blat	CDS	30266993	30267126	134	+	.	Parent=Osjap04g27970.1
chr04	blat	CDS	30268402	30268525	124	+	.	Parent=Osjap04g27970.1
chr04	blat	CDS	30268619	30268891	273	+	.	Parent=Osjap04g27970.1
chr04	blat	CDS	30269018	30269287	270	+	.	Parent=Osjap04g27970.1
chr04	blat	CDS	30269383	30269973	591	+	.	Parent=Osjap04g27970.1
chr04	blat	CDS	30270064	30270179	116	+	.	Parent=Osjap04g27970.1
chr04	blat	CDS	30271205	30271391	187	+	.	Parent=Osjap04g27970.1
chr04	blat	transcript	32370809	32381826	1	-	.	ID=Osjap04g30680;Name=Osjap04g30680.1
chr04	blat	CDS	32370810	32371040	231	-	.	Parent=Osjap04g30680.1
chr04	blat	CDS	32371471	32371572	102	-	.	Parent=Osjap04g30680.1
chr04	blat	CDS	32371825	32372004	180	-	.	Parent=Osjap04g30680.1
chr04	blat	CDS	32372117	32372194	78	-	.	Parent=Osjap04g30680.1
chr04	blat	CDS	32373595	32373714	120	-	.	Parent=Osjap04g30680.1
chr04	blat	CDS	32373807	32373899	93	-	.	Parent=Osjap04g30680.1
chr04	blat	CDS	32374171	32374214	44	-	.	Parent=Osjap04g30680.1
chr04	blat	CDS	32374464	32374539	76	-	.	Parent=Osjap04g30680.1
chr04	blat	CDS	32374769	32374924	156	-	.	Parent=Osjap04g30680.1
chr04	blat	CDS	32375053	32375136	84	-	.	Parent=Osjap04g30680.1
chr04	blat	CDS	32375869	32376546	678	-	.	Parent=Osjap04g30680.1
chr04	blat	CDS	32377907	32377970	64	-	.	Parent=Osjap04g30680.1
chr04	blat	CDS	32378061	32378288	228	-	.	Parent=Osjap04g30680.1
chr04	blat	CDS	32379143	32379900	758	-	.	Parent=Osjap04g30680.1
chr04	blat	CDS	32379994	32380029	36	-	.	Parent=Osjap04g30680.1
chr04	blat	CDS	32380130	32380272	143	-	.	Parent=Osjap04g30680.1
chr04	blat	CDS	32380356	32380512	157	-	.	Parent=Osjap04g30680.1
chr04	blat	CDS	32380611	32380772	162	-	.	Parent=Osjap04g30680.1
chr04	blat	CDS	32380953	32381161	209	-	.	Parent=Osjap04g30680.1
chr04	blat	CDS	32381748	32381826	79	-	.	Parent=Osjap04g30680.1
chr04	blat	transcript	34816948	34822895	1	-	.	ID=Osjap04g34120;Name=Osjap04g34120.1
chr04	blat	CDS	34816949	34817157	209	-	.	Parent=Osjap04g34120.1
chr04	blat	CDS	34817249	34817319	71	-	.	Parent=Osjap04g34120.1
chr04	blat	CDS	34817426	34817481	56	-	.	Parent=Osjap04g34120.1
chr04	blat	CDS	34817910	34818048	139	-	.	Parent=Osjap04g34120.1
chr04	blat	CDS	34818173	34818558	386	-	.	Parent=Osjap04g34120.1
chr04	blat	CDS	34818664	34818714	51	-	.	Parent=Osjap04g34120.1
chr04	blat	CDS	34818799	34818884	86	-	.	Parent=Osjap04g34120.1
chr04	blat	CDS	34818975	34819320	346	-	.	Parent=Osjap04g34120.1
chr04	blat	CDS	34819820	34820096	277	-	.	Parent=Osjap04g34120.1
chr04	blat	CDS	34820969	34821003	35	-	.	Parent=Osjap04g34120.1
chr04	blat	CDS	34821104	34821178	75	-	.	Parent=Osjap04g34120.1
chr04	blat	CDS	34821320	34821456	137	-	.	Parent=Osjap04g34120.1
chr04	blat	CDS	34821542	34821701	160	-	.	Parent=Osjap04g34120.1
chr04	blat	CDS	34821780	34821875	96	-	.	Parent=Osjap04g34120.1
chr04	blat	CDS	34821956	34822110	155	-	.	Parent=Osjap04g34120.1
chr04	blat	CDS	34822763	34822895	133	-	.	Parent=Osjap04g34120.1
chr04	blat	transcript	35488533	35491901	1	-	.	ID=Osjap04g35010;Name=Osjap04g35010.1
chr04	blat	CDS	35488534	35488602	69	-	.	Parent=Osjap04g35010.1
chr04	blat	CDS	35490406	35490834	429	-	.	Parent=Osjap04g35010.1
chr04	blat	CDS	35490863	35490869	7	-	.	Parent=Osjap04g35010.1
chr04	blat	CDS	35491349	35491624	276	-	.	Parent=Osjap04g35010.1
chr04	blat	CDS	35491771	35491901	131	-	.	Parent=Osjap04g35010.1
chr05	blat	transcript	28743710	28751809	1	-	.	ID=Osjap05g30140;Name=Osjap05g30140.4
chr05	blat	CDS	28743711	28744541	831	-	.	Parent=Osjap05g30140.4
chr05	blat	CDS	28747259	28747372	114	-	.	Parent=Osjap05g30140.4
chr05	blat	CDS	28747477	28747567	91	-	.	Parent=Osjap05g30140.4
chr05	blat	CDS	28748641	28748781	141	-	.	Parent=Osjap05g30140.4
chr05	blat	CDS	28748886	28748951	66	-	.	Parent=Osjap05g30140.4
chr05	blat	CDS	28749506	28749643	138	-	.	Parent=Osjap05g30140.4
chr05	blat	CDS	28750085	28750186	102	-	.	Parent=Osjap05g30140.4
chr05	blat	CDS	28750327	28750401	75	-	.	Parent=Osjap05g30140.4
chr05	blat	CDS	28750482	28750562	81	-	.	Parent=Osjap05g30140.4
chr05	blat	CDS	28750640	28750709	70	-	.	Parent=Osjap05g30140.4
chr05	blat	CDS	28750924	28751000	77	-	.	Parent=Osjap05g30140.4
chr05	blat	CDS	28751361	28751809	449	-	.	Parent=Osjap05g30140.4
chr06	blat	transcript	394817	401698	1	-	.	ID=Osjap06g00390;Name=Osjap06g00390.1
chr06	blat	CDS	394818	394938	121	-	.	Parent=Osjap06g00390.1
chr06	blat	CDS	395331	395482	152	-	.	Parent=Osjap06g00390.1
chr06	blat	CDS	395595	395756	162	-	.	Parent=Osjap06g00390.1
chr06	blat	CDS	395875	396085	211	-	.	Parent=Osjap06g00390.1
chr06	blat	CDS	396174	396290	117	-	.	Parent=Osjap06g00390.1
chr06	blat	CDS	396794	396859	66	-	.	Parent=Osjap06g00390.1
chr06	blat	CDS	397020	397292	273	-	.	Parent=Osjap06g00390.1
chr06	blat	CDS	399230	399327	98	-	.	Parent=Osjap06g00390.1
chr06	blat	CDS	399738	399797	60	-	.	Parent=Osjap06g00390.1
chr06	blat	CDS	400530	400639	110	-	.	Parent=Osjap06g00390.1
chr06	blat	CDS	401412	401480	69	-	.	Parent=Osjap06g00390.1
chr06	blat	CDS	401599	401698	100	-	.	Parent=Osjap06g00390.1
chr06	blat	transcript	2515838	2535061	1	+	.	ID=Osjap06g03630;Name=Osjap06g03630.2
chr06	blat	CDS	2515839	2516076	238	+	.	Parent=Osjap06g03630.2
chr06	blat	CDS	2516182	2516312	131	+	.	Parent=Osjap06g03630.2
chr06	blat	CDS	2516522	2516755	234	+	.	Parent=Osjap06g03630.2
chr06	blat	CDS	2516890	2517145	256	+	.	Parent=Osjap06g03630.2
chr06	blat	CDS	2517308	2517495	188	+	.	Parent=Osjap06g03630.2
chr06	blat	CDS	2518262	2518565	304	+	.	Parent=Osjap06g03630.2
chr06	blat	CDS	2527995	2528125	131	+	.	Parent=Osjap06g03630.2
chr06	blat	CDS	2528989	2529343	355	+	.	Parent=Osjap06g03630.2
chr06	blat	CDS	2530270	2531454	1185	+	.	Parent=Osjap06g03630.2
chr06	blat	CDS	2533240	2534175	936	+	.	Parent=Osjap06g03630.2
chr06	blat	CDS	2534227	2534420	194	+	.	Parent=Osjap06g03630.2
chr06	blat	CDS	2535020	2535061	42	+	.	Parent=Osjap06g03630.2
chr06	blat	transcript	29757006	29766696	1	-	.	ID=Osjap06g31140;Name=Osjap06g31140.1
chr06	blat	CDS	29757007	29757099	93	-	.	Parent=Osjap06g31140.1
chr06	blat	CDS	29757812	29757955	144	-	.	Parent=Osjap06g31140.1
chr06	blat	CDS	29758703	29758780	78	-	.	Parent=Osjap06g31140.1
chr06	blat	CDS	29758869	29758950	82	-	.	Parent=Osjap06g31140.1
chr06	blat	CDS	29759042	29759113	72	-	.	Parent=Osjap06g31140.1
chr06	blat	CDS	29759217	29759338	122	-	.	Parent=Osjap06g31140.1
chr06	blat	CDS	29759442	29759497	56	-	.	Parent=Osjap06g31140.1
chr06	blat	CDS	29760165	29760234	70	-	.	Parent=Osjap06g31140.1
chr06	blat	CDS	29760336	29760419	84	-	.	Parent=Osjap06g31140.1
chr06	blat	CDS	29760500	29760568	69	-	.	Parent=Osjap06g31140.1
chr06	blat	CDS	29760756	29760829	74	-	.	Parent=Osjap06g31140.1
chr06	blat	CDS	29760915	29761026	112	-	.	Parent=Osjap06g31140.1
chr06	blat	CDS	29761121	29761414	294	-	.	Parent=Osjap06g31140.1
chr06	blat	CDS	29762750	29762800	51	-	.	Parent=Osjap06g31140.1
chr06	blat	CDS	29762912	29762959	48	-	.	Parent=Osjap06g31140.1
chr06	blat	CDS	29763039	29763116	78	-	.	Parent=Osjap06g31140.1
chr06	blat	CDS	29763205	29763261	57	-	.	Parent=Osjap06g31140.1
chr06	blat	CDS	29763498	29763563	66	-	.	Parent=Osjap06g31140.1
chr06	blat	CDS	29763651	29763740	90	-	.	Parent=Osjap06g31140.1
chr06	blat	CDS	29764037	29764114	78	-	.	Parent=Osjap06g31140.1
chr06	blat	CDS	29764219	29764323	105	-	.	Parent=Osjap06g31140.1
chr06	blat	CDS	29764435	29764570	136	-	.	Parent=Osjap06g31140.1
chr06	blat	CDS	29764679	29764754	76	-	.	Parent=Osjap06g31140.1
chr06	blat	CDS	29764874	29765078	205	-	.	Parent=Osjap06g31140.1
chr06	blat	CDS	29765190	29765402	213	-	.	Parent=Osjap06g31140.1
chr06	blat	CDS	29765974	29766696	723	-	.	Parent=Osjap06g31140.1
chr06	blat	transcript	31148048	31156354	1	+	.	ID=Osjap06g33090;Name=Osjap06g33090.1
chr06	blat	CDS	31148049	31148155	107	+	.	Parent=Osjap06g33090.1
chr06	blat	CDS	31149161	31149292	132	+	.	Parent=Osjap06g33090.1
chr06	blat	CDS	31149667	31149802	136	+	.	Parent=Osjap06g33090.1
chr06	blat	CDS	31149893	31150007	115	+	.	Parent=Osjap06g33090.1
chr06	blat	CDS	31150555	31150625	71	+	.	Parent=Osjap06g33090.1
chr06	blat	CDS	31152878	31153036	159	+	.	Parent=Osjap06g33090.1
chr06	blat	CDS	31153118	31153229	112	+	.	Parent=Osjap06g33090.1
chr06	blat	CDS	31153905	31154002	98	+	.	Parent=Osjap06g33090.1
chr06	blat	CDS	31154176	31154326	151	+	.	Parent=Osjap06g33090.1
chr06	blat	CDS	31154374	31154555	182	+	.	Parent=Osjap06g33090.1
chr06	blat	CDS	31154839	31154873	35	+	.	Parent=Osjap06g33090.1
chr06	blat	CDS	31154978	31155134	157	+	.	Parent=Osjap06g33090.1
chr06	blat	CDS	31155229	31155282	54	+	.	Parent=Osjap06g33090.1
chr06	blat	CDS	31155403	31155495	93	+	.	Parent=Osjap06g33090.1
chr06	blat	CDS	31155586	31155728	143	+	.	Parent=Osjap06g33090.1
chr06	blat	CDS	31155840	31155910	71	+	.	Parent=Osjap06g33090.1
chr06	blat	CDS	31156057	31156140	84	+	.	Parent=Osjap06g33090.1
chr06	blat	CDS	31156224	31156354	131	+	.	Parent=Osjap06g33090.1
chr07	blat	transcript	3270773	3277452	1	-	.	ID=Osjap07g04240;Name=Osjap07g04240.1
chr07	blat	CDS	3270774	3270920	147	-	.	Parent=Osjap07g04240.1
chr07	blat	CDS	3271250	3271393	144	-	.	Parent=Osjap07g04240.1
chr07	blat	CDS	3271492	3272141	650	-	.	Parent=Osjap07g04240.1
chr07	blat	CDS	3272499	3272555	57	-	.	Parent=Osjap07g04240.1
chr07	blat	CDS	3273027	3273045	19	-	.	Parent=Osjap07g04240.1
chr07	blat	CDS	3273133	3273210	78	-	.	Parent=Osjap07g04240.1
chr07	blat	CDS	3273623	3273751	129	-	.	Parent=Osjap07g04240.1
chr07	blat	CDS	3273836	3273892	57	-	.	Parent=Osjap07g04240.1
chr07	blat	CDS	3274541	3274771	231	-	.	Parent=Osjap07g04240.1
chr07	blat	CDS	3275596	3275763	168	-	.	Parent=Osjap07g04240.1
chr07	blat	CDS	3275768	3275911	144	-	.	Parent=Osjap07g04240.1
chr07	blat	CDS	3276291	3276374	84	-	.	Parent=Osjap07g04240.1
chr07	blat	CDS	3276457	3276532	76	-	.	Parent=Osjap07g04240.1
chr07	blat	CDS	3276616	3276872	257	-	.	Parent=Osjap07g04240.1
chr07	blat	CDS	3276943	3277050	108	-	.	Parent=Osjap07g04240.1
chr07	blat	CDS	3277176	3277374	199	-	.	Parent=Osjap07g04240.1
chr07	blat	CDS	3277448	3277452	5	-	.	Parent=Osjap07g04240.1
chr07	blat	transcript	10128665	10145905	1	-	.	ID=Osjap07g11390;Name=Osjap07g11390.1
chr07	blat	CDS	10128666	10128818	153	-	.	Parent=Osjap07g11390.1
chr07	blat	CDS	10129118	10129522	405	-	.	Parent=Osjap07g11390.1
chr07	blat	CDS	10131036	10131173	138	-	.	Parent=Osjap07g11390.1
chr07	blat	CDS	10131244	10131325	82	-	.	Parent=Osjap07g11390.1
chr07	blat	CDS	10131439	10131786	348	-	.	Parent=Osjap07g11390.1
chr07	blat	CDS	10132137	10132498	362	-	.	Parent=Osjap07g11390.1
chr07	blat	CDS	10134305	10134345	41	-	.	Parent=Osjap07g11390.1
chr07	blat	CDS	10136799	10136898	100	-	.	Parent=Osjap07g11390.1
chr07	blat	CDS	10137034	10137482	449	-	.	Parent=Osjap07g11390.1
chr07	blat	CDS	10142539	10142608	70	-	.	Parent=Osjap07g11390.1
chr07	blat	CDS	10143006	10144550	1545	-	.	Parent=Osjap07g11390.1
chr07	blat	CDS	10144613	10145905	1293	-	.	Parent=Osjap07g11390.1
chr07	blat	transcript	23003476	23008118	1	+	.	ID=Osjap07g22430;Name=Osjap07g22430.1
chr07	blat	CDS	23003477	23003564	88	+	.	Parent=Osjap07g22430.1
chr07	blat	CDS	23004111	23004126	16	+	.	Parent=Osjap07g22430.1
chr07	blat	CDS	23004135	23004409	275	+	.	Parent=Osjap07g22430.1
chr07	blat	CDS	23004788	23004849	62	+	.	Parent=Osjap07g22430.1
chr07	blat	CDS	23004940	23005035	96	+	.	Parent=Osjap07g22430.1
chr07	blat	CDS	23005375	23005472	98	+	.	Parent=Osjap07g22430.1
chr07	blat	CDS	23005557	23005668	112	+	.	Parent=Osjap07g22430.1
chr07	blat	CDS	23006478	23006519	42	+	.	Parent=Osjap07g22430.1
chr07	blat	CDS	23007546	23007602	57	+	.	Parent=Osjap07g22430.1
chr07	blat	CDS	23007695	23007745	51	+	.	Parent=Osjap07g22430.1
chr07	blat	CDS	23007863	23007919	57	+	.	Parent=Osjap07g22430.1
chr07	blat	CDS	23008101	23008118	18	+	.	Parent=Osjap07g22430.1
chr07	blat	transcript	25531121	25538868	1	+	.	ID=Osjap07g25960;Name=Osjap07g25960.2
chr07	blat	CDS	25531122	25531205	84	+	.	Parent=Osjap07g25960.2
chr07	blat	CDS	25531356	25531412	57	+	.	Parent=Osjap07g25960.2
chr07	blat	CDS	25531553	25531620	68	+	.	Parent=Osjap07g25960.2
chr07	blat	CDS	25531767	25531971	205	+	.	Parent=Osjap07g25960.2
chr07	blat	CDS	25532042	25532166	125	+	.	Parent=Osjap07g25960.2
chr07	blat	CDS	25532445	25532520	76	+	.	Parent=Osjap07g25960.2
chr07	blat	CDS	25532645	25532704	60	+	.	Parent=Osjap07g25960.2
chr07	blat	CDS	25533243	25533321	79	+	.	Parent=Osjap07g25960.2
chr07	blat	CDS	25536207	25536265	59	+	.	Parent=Osjap07g25960.2
chr07	blat	CDS	25537528	25537725	198	+	.	Parent=Osjap07g25960.2
chr07	blat	CDS	25537822	25538044	223	+	.	Parent=Osjap07g25960.2
chr07	blat	CDS	25538429	25538564	136	+	.	Parent=Osjap07g25960.2
chr07	blat	CDS	25538748	25538868	121	+	.	Parent=Osjap07g25960.2
chr07	blat	transcript	27307928	27309527	1	+	.	ID=Osjap07g28390;Name=Osjap07g28390.1
chr07	blat	CDS	27307929	27308250	322	+	.	Parent=Osjap07g28390.1
chr07	blat	CDS	27308781	27308838	58	+	.	Parent=Osjap07g28390.1
chr07	blat	CDS	27309392	27309527	136	+	.	Parent=Osjap07g28390.1
chr07	blat	transcript	28075774	28080940	1	-	.	ID=Osjap07g29350;Name=Osjap07g29350.1
chr07	blat	CDS	28075775	28075797	23	-	.	Parent=Osjap07g29350.1
chr07	blat	CDS	28075934	28075987	54	-	.	Parent=Osjap07g29350.1
chr07	blat	CDS	28076124	28076199	76	-	.	Parent=Osjap07g29350.1
chr07	blat	CDS	28076306	28076337	32	-	.	Parent=Osjap07g29350.1
chr07	blat	CDS	28076500	28076595	96	-	.	Parent=Osjap07g29350.1
chr07	blat	CDS	28076684	28076785	102	-	.	Parent=Osjap07g29350.1
chr07	blat	CDS	28076870	28076948	79	-	.	Parent=Osjap07g29350.1
chr07	blat	CDS	28077530	28077674	145	-	.	Parent=Osjap07g29350.1
chr07	blat	CDS	28077990	28078088	99	-	.	Parent=Osjap07g29350.1
chr07	blat	CDS	28078190	28078251	62	-	.	Parent=Osjap07g29350.1
chr07	blat	CDS	28078662	28078934	273	-	.	Parent=Osjap07g29350.1
chr07	blat	CDS	28079006	28079133	128	-	.	Parent=Osjap07g29350.1
chr07	blat	CDS	28079224	28079343	120	-	.	Parent=Osjap07g29350.1
chr07	blat	CDS	28079435	28079500	66	-	.	Parent=Osjap07g29350.1
chr07	blat	CDS	28079572	28079640	69	-	.	Parent=Osjap07g29350.1
chr07	blat	CDS	28079762	28079772	11	-	.	Parent=Osjap07g29350.1
chr07	blat	CDS	28080505	28080529	25	-	.	Parent=Osjap07g29350.1
chr07	blat	CDS	28080787	28080940	154	-	.	Parent=Osjap07g29350.1
chr08	blat	transcript	12284997	12293003	1	+	.	ID=Osjap08g10540;Name=Osjap08g10540.1
chr08	blat	CDS	12284998	12285816	819	+	.	Parent=Osjap08g10540.1
chr08	blat	CDS	12287556	12287660	105	+	.	Parent=Osjap08g10540.1
chr08	blat	CDS	12287729	12287785	57	+	.	Parent=Osjap08g10540.1
chr08	blat	CDS	12288211	12288283	73	+	.	Parent=Osjap08g10540.1
chr08	blat	CDS	12288767	12288945	179	+	.	Parent=Osjap08g10540.1
chr08	blat	CDS	12289030	12289203	174	+	.	Parent=Osjap08g10540.1
chr08	blat	CDS	12289283	12289568	286	+	.	Parent=Osjap08g10540.1
chr08	blat	CDS	12289675	12289751	77	+	.	Parent=Osjap08g10540.1
chr08	blat	CDS	12289841	12289910	70	+	.	Parent=Osjap08g10540.1
chr08	blat	CDS	12289993	12290064	72	+	.	Parent=Osjap08g10540.1
chr08	blat	CDS	12290162	12290397	236	+	.	Parent=Osjap08g10540.1
chr08	blat	CDS	12290482	12290616	135	+	.	Parent=Osjap08g10540.1
chr08	blat	CDS	12290708	12291003	296	+	.	Parent=Osjap08g10540.1
chr08	blat	CDS	12291479	12291650	172	+	.	Parent=Osjap08g10540.1
chr08	blat	CDS	12291752	12291850	99	+	.	Parent=Osjap08g10540.1
chr08	blat	CDS	12291946	12292077	132	+	.	Parent=Osjap08g10540.1
chr08	blat	CDS	12292192	12292292	101	+	.	Parent=Osjap08g10540.1
chr08	blat	CDS	12292668	12292857	190	+	.	Parent=Osjap08g10540.1
chr08	blat	CDS	12292965	12293003	39	+	.	Parent=Osjap08g10540.1
chr08	blat	transcript	17581105	17585917	1	-	.	ID=Osjap08g13760;Name=Osjap08g13760.3
chr08	blat	CDS	17581106	17581275	170	-	.	Parent=Osjap08g13760.3
chr08	blat	CDS	17582386	17582470	85	-	.	Parent=Osjap08g13760.3
chr08	blat	CDS	17582580	17582702	123	-	.	Parent=Osjap08g13760.3
chr08	blat	CDS	17582807	17582948	142	-	.	Parent=Osjap08g13760.3
chr08	blat	CDS	17583030	17583187	158	-	.	Parent=Osjap08g13760.3
chr08	blat	CDS	17585687	17585827	141	-	.	Parent=Osjap08g13760.3
chr08	blat	CDS	17585837	17585917	81	-	.	Parent=Osjap08g13760.3
chr08	blat	transcript	23828780	23844086	1	+	.	ID=Osjap08g19480;Name=Osjap08g19480.1
chr08	blat	CDS	23828781	23828865	85	+	.	Parent=Osjap08g19480.1
chr08	blat	CDS	23830154	23830227	74	+	.	Parent=Osjap08g19480.1
chr08	blat	CDS	23830376	23830549	174	+	.	Parent=Osjap08g19480.1
chr08	blat	CDS	23830641	23830862	222	+	.	Parent=Osjap08g19480.1
chr08	blat	CDS	23831226	23831551	326	+	.	Parent=Osjap08g19480.1
chr08	blat	CDS	23831890	23832019	130	+	.	Parent=Osjap08g19480.1
chr08	blat	CDS	23832387	23832683	297	+	.	Parent=Osjap08g19480.1
chr08	blat	CDS	23832792	23833057	266	+	.	Parent=Osjap08g19480.1
chr08	blat	CDS	23835077	23835575	499	+	.	Parent=Osjap08g19480.1
chr08	blat	CDS	23836144	23836235	92	+	.	Parent=Osjap08g19480.1
chr08	blat	CDS	23836813	23836977	165	+	.	Parent=Osjap08g19480.1
chr08	blat	CDS	23837059	23837446	388	+	.	Parent=Osjap08g19480.1
chr08	blat	CDS	23837517	23837635	119	+	.	Parent=Osjap08g19480.1
chr08	blat	CDS	23837736	23837766	31	+	.	Parent=Osjap08g19480.1
chr08	blat	CDS	23837917	23838122	206	+	.	Parent=Osjap08g19480.1
chr08	blat	CDS	23838212	23838256	45	+	.	Parent=Osjap08g19480.1
chr08	blat	CDS	23838362	23838443	82	+	.	Parent=Osjap08g19480.1
chr08	blat	CDS	23839452	23839640	189	+	.	Parent=Osjap08g19480.1
chr08	blat	CDS	23841741	23841844	104	+	.	Parent=Osjap08g19480.1
chr08	blat	CDS	23841911	23842001	91	+	.	Parent=Osjap08g19480.1
chr08	blat	CDS	23842339	23842467	129	+	.	Parent=Osjap08g19480.1
chr08	blat	CDS	23842667	23842798	132	+	.	Parent=Osjap08g19480.1
chr08	blat	CDS	23843021	23843191	171	+	.	Parent=Osjap08g19480.1
chr08	blat	CDS	23843414	23843473	60	+	.	Parent=Osjap08g19480.1
chr08	blat	CDS	23843555	23843633	79	+	.	Parent=Osjap08g19480.1
chr08	blat	CDS	23843908	23844086	179	+	.	Parent=Osjap08g19480.1
chr09	blat	transcript	344602	345565	1	+	.	ID=Osjap09g00070;Name=Osjap09g00070.1
chr09	blat	CDS	344603	345565	84	+	.	Parent=Osjap09g00070.1
chr09	blat	transcript	10906211	10930550	1	-	.	ID=Osjap09g06840;Name=Osjap09g06840.5
chr09	blat	CDS	10906212	10906451	240	-	.	Parent=Osjap09g06840.5
chr09	blat	CDS	10906884	10907019	136	-	.	Parent=Osjap09g06840.5
chr09	blat	CDS	10907136	10907260	125	-	.	Parent=Osjap09g06840.5
chr09	blat	CDS	10917103	10917337	235	-	.	Parent=Osjap09g06840.5
chr09	blat	CDS	10917443	10917649	207	-	.	Parent=Osjap09g06840.5
chr09	blat	CDS	10917827	10918027	201	-	.	Parent=Osjap09g06840.5
chr09	blat	CDS	10918072	10918170	99	-	.	Parent=Osjap09g06840.5
chr09	blat	CDS	10919245	10919314	70	-	.	Parent=Osjap09g06840.5
chr09	blat	CDS	10929348	10929453	106	-	.	Parent=Osjap09g06840.5
chr09	blat	CDS	10929594	10929673	80	-	.	Parent=Osjap09g06840.5
chr09	blat	CDS	10929775	10929859	85	-	.	Parent=Osjap09g06840.5
chr09	blat	CDS	10929942	10930025	84	-	.	Parent=Osjap09g06840.5
chr09	blat	CDS	10930114	10930188	75	-	.	Parent=Osjap09g06840.5
chr09	blat	CDS	10930299	10930395	97	-	.	Parent=Osjap09g06840.5
chr09	blat	CDS	10930492	10930550	59	-	.	Parent=Osjap09g06840.5
chr09	blat	transcript	20764797	20777042	1	+	.	ID=Osjap09g17720;Name=Osjap09g17720.1
chr09	blat	CDS	20764798	20765115	318	+	.	Parent=Osjap09g17720.1
chr09	blat	CDS	20766655	20766816	162	+	.	Parent=Osjap09g17720.1
chr09	blat	CDS	20766932	20767084	153	+	.	Parent=Osjap09g17720.1
chr09	blat	CDS	20767542	20767723	182	+	.	Parent=Osjap09g17720.1
chr09	blat	CDS	20768596	20769003	408	+	.	Parent=Osjap09g17720.1
chr09	blat	CDS	20769023	20769509	487	+	.	Parent=Osjap09g17720.1
chr09	blat	CDS	20770208	20770786	579	+	.	Parent=Osjap09g17720.1
chr09	blat	CDS	20770913	20771020	108	+	.	Parent=Osjap09g17720.1
chr09	blat	CDS	20771573	20771676	104	+	.	Parent=Osjap09g17720.1
chr09	blat	CDS	20774320	20775226	907	+	.	Parent=Osjap09g17720.1
chr09	blat	CDS	20775325	20775804	480	+	.	Parent=Osjap09g17720.1
chr09	blat	CDS	20777001	20777042	42	+	.	Parent=Osjap09g17720.1
chr10	blat	transcript	17475728	17490000	1	-	.	ID=Osjap10g15240;Name=Osjap10g15240.1
chr10	blat	CDS	17475729	17475860	132	-	.	Parent=Osjap10g15240.1
chr10	blat	CDS	17476237	17476605	369	-	.	Parent=Osjap10g15240.1
chr10	blat	CDS	17477083	17477269	187	-	.	Parent=Osjap10g15240.1
chr10	blat	CDS	17477532	17477724	193	-	.	Parent=Osjap10g15240.1
chr10	blat	CDS	17477829	17478102	274	-	.	Parent=Osjap10g15240.1
chr10	blat	CDS	17478180	17478339	160	-	.	Parent=Osjap10g15240.1
chr10	blat	CDS	17478950	17479164	215	-	.	Parent=Osjap10g15240.1
chr10	blat	CDS	17479749	17479841	93	-	.	Parent=Osjap10g15240.1
chr10	blat	CDS	17480157	17480225	69	-	.	Parent=Osjap10g15240.1
chr10	blat	CDS	17480258	17480410	153	-	.	Parent=Osjap10g15240.1
chr10	blat	CDS	17480499	17480702	204	-	.	Parent=Osjap10g15240.1
chr10	blat	CDS	17481381	17481656	276	-	.	Parent=Osjap10g15240.1
chr10	blat	CDS	17482301	17482396	96	-	.	Parent=Osjap10g15240.1
chr10	blat	CDS	17482550	17482753	204	-	.	Parent=Osjap10g15240.1
chr10	blat	CDS	17482842	17483034	193	-	.	Parent=Osjap10g15240.1
chr10	blat	CDS	17483194	17483339	146	-	.	Parent=Osjap10g15240.1
chr10	blat	CDS	17483736	17484390	655	-	.	Parent=Osjap10g15240.1
chr10	blat	CDS	17486427	17486739	313	-	.	Parent=Osjap10g15240.1
chr10	blat	CDS	17486954	17487104	151	-	.	Parent=Osjap10g15240.1
chr10	blat	CDS	17487567	17488780	1214	-	.	Parent=Osjap10g15240.1
chr10	blat	CDS	17488898	17489147	250	-	.	Parent=Osjap10g15240.1
chr10	blat	CDS	17489749	17490000	252	-	.	Parent=Osjap10g15240.1
chr11	blat	transcript	2112526	2124159	1	-	.	ID=Osjap11g03220;Name=Osjap11g03220.1
chr11	blat	CDS	2112527	2112802	276	-	.	Parent=Osjap11g03220.1
chr11	blat	CDS	2113198	2113584	387	-	.	Parent=Osjap11g03220.1
chr11	blat	CDS	2113759	2114117	359	-	.	Parent=Osjap11g03220.1
chr11	blat	CDS	2114511	2114634	124	-	.	Parent=Osjap11g03220.1
chr11	blat	CDS	2114716	2114784	69	-	.	Parent=Osjap11g03220.1
chr11	blat	CDS	2115772	2115820	49	-	.	Parent=Osjap11g03220.1
chr11	blat	CDS	2116421	2116535	115	-	.	Parent=Osjap11g03220.1
chr11	blat	CDS	2117059	2117108	50	-	.	Parent=Osjap11g03220.1
chr11	blat	CDS	2117205	2117342	138	-	.	Parent=Osjap11g03220.1
chr11	blat	CDS	2119361	2119576	216	-	.	Parent=Osjap11g03220.1
chr11	blat	CDS	2120669	2120900	232	-	.	Parent=Osjap11g03220.1
chr11	blat	CDS	2120984	2121062	79	-	.	Parent=Osjap11g03220.1
chr11	blat	CDS	2121161	2121229	69	-	.	Parent=Osjap11g03220.1
chr11	blat	CDS	2121315	2121407	93	-	.	Parent=Osjap11g03220.1
chr11	blat	CDS	2121813	2121858	46	-	.	Parent=Osjap11g03220.1
chr11	blat	CDS	2122459	2122504	46	-	.	Parent=Osjap11g03220.1
chr11	blat	CDS	2122590	2122647	58	-	.	Parent=Osjap11g03220.1
chr11	blat	CDS	2122813	2122851	39	-	.	Parent=Osjap11g03220.1
chr11	blat	CDS	2122948	2123019	72	-	.	Parent=Osjap11g03220.1
chr11	blat	CDS	2123166	2123257	92	-	.	Parent=Osjap11g03220.1
chr11	blat	CDS	2124060	2124159	100	-	.	Parent=Osjap11g03220.1
chr12	blat	transcript	21226136	21235073	1	-	.	ID=Osjap12g18490;Name=Osjap12g18490.1
chr12	blat	CDS	21226137	21226233	97	-	.	ID=Osjap12g18490;Name=Osjap12g18490.1
chr12	blat	CDS	21226545	21226582	38	-	.	ID=Osjap12g18490;Name=Osjap12g18490.1
chr12	blat	CDS	21227049	21227181	133	-	.	ID=Osjap12g18490;Name=Osjap12g18490.1
chr12	blat	CDS	21227262	21227311	50	-	.	ID=Osjap12g18490;Name=Osjap12g18490.1
chr12	blat	CDS	21227390	21227554	165	-	.	ID=Osjap12g18490;Name=Osjap12g18490.1
chr12	blat	CDS	21227639	21227875	237	-	.	ID=Osjap12g18490;Name=Osjap12g18490.1
chr12	blat	CDS	21227973	21228034	62	-	.	ID=Osjap12g18490;Name=Osjap12g18490.1
chr12	blat	CDS	21230458	21230544	87	-	.	ID=Osjap12g18490;Name=Osjap12g18490.1
chr12	blat	CDS	21231048	21231210	163	-	.	ID=Osjap12g18490;Name=Osjap12g18490.1
chr12	blat	CDS	21231298	21231446	149	-	.	ID=Osjap12g18490;Name=Osjap12g18490.1
chr12	blat	CDS	21232272	21232403	132	-	.	ID=Osjap12g18490;Name=Osjap12g18490.1
chr12	blat	CDS	21232484	21232589	106	-	.	ID=Osjap12g18490;Name=Osjap12g18490.1
chr12	blat	CDS	21232684	21232747	64	-	.	ID=Osjap12g18490;Name=Osjap12g18490.1
chr12	blat	CDS	21232845	21233200	356	-	.	ID=Osjap12g18490;Name=Osjap12g18490.1
chr12	blat	CDS	21233875	21234093	219	-	.	ID=Osjap12g18490;Name=Osjap12g18490.1
chr12	blat	CDS	21234444	21234549	106	-	.	ID=Osjap12g18490;Name=Osjap12g18490.1
chr12	blat	CDS	21234829	21235073	245	-	.	ID=Osjap12g18490;Name=Osjap12g18490.1
chr06	StringTie	transcript	27320879	27334013	1000	-	.	ID=Osjap06g27840;Name=Osjap06g27840.1
chr06	StringTie	CDS	27320879	27320971	1000	-	.	ID=Osjap06g27840;Parent=Osjap06g27840.1
chr06	StringTie	CDS	27321574	27321878	1000	-	.	ID=Osjap06g27840;Parent=Osjap06g27840.1
chr06	StringTie	CDS	27324049	27324258	1000	-	.	ID=Osjap06g27840;Parent=Osjap06g27840.1
chr06	StringTie	CDS	27330270	27330445	1000	-	.	ID=Osjap06g27840;Parent=Osjap06g27840.1
chr06	StringTie	CDS	27333677	27334013	1000	-	.	ID=Osjap06g27840;Parent=Osjap06g27840.1
chr10	StringTie	transcript	15229687	15233052	1000	-	.	ID=Osjap10g12540;Name=Osjap10g12540.3
chr10	StringTie	CDS	15229687	15229765	1000	-	.	ID=Osjap10g12540;Parent=Osjap10g12540.3
chr10	StringTie	CDS	15230192	15230320	1000	-	.	ID=Osjap10g12540;Parent=Osjap10g12540.3
chr10	StringTie	CDS	15230450	15230657	1000	-	.	ID=Osjap10g12540;Parent=Osjap10g12540.3
chr10	StringTie	CDS	15232389	15232449	1000	-	.	ID=Osjap10g12540;Parent=Osjap10g12540.3
chr10	StringTie	CDS	15232560	15232625	1000	-	.	ID=Osjap10g12540;Parent=Osjap10g12540.3
chr10	StringTie	CDS	15232741	15232865	1000	-	.	ID=Osjap10g12540;Parent=Osjap10g12540.3
chr10	StringTie	CDS	15232959	15233052	1000	-	.	ID=Osjap10g12540;Parent=Osjap10g12540.3
chr03	blat	transcript	471999	484689	1	-	.	ID=Osjap03g00710;Name=Osjap03g00710.1
chr03	blat	CDS	472000	472112	113	-	.	Parent=Osjap03g00710.1
chr03	blat	CDS	472195	472302	108	-	.	Parent=Osjap03g00710.1
chr03	blat	CDS	472676	472735	60	-	.	Parent=Osjap03g00710.1
chr03	blat	CDS	472936	473031	96	-	.	Parent=Osjap03g00710.1
chr03	blat	CDS	473150	473206	57	-	.	Parent=Osjap03g00710.1
chr03	blat	CDS	473441	473500	60	-	.	Parent=Osjap03g00710.1
chr03	blat	CDS	473930	474062	133	-	.	Parent=Osjap03g00710.1
chr03	blat	CDS	474395	474475	81	-	.	Parent=Osjap03g00710.1
chr03	blat	CDS	474942	475018	77	-	.	Parent=Osjap03g00710.1
chr03	blat	CDS	475107	475183	77	-	.	Parent=Osjap03g00710.1
chr03	blat	CDS	475920	476022	103	-	.	Parent=Osjap03g00710.1
chr03	blat	CDS	476185	476229	45	-	.	Parent=Osjap03g00710.1
chr03	blat	CDS	476335	476389	55	-	.	Parent=Osjap03g00710.1
chr03	blat	CDS	476503	476651	149	-	.	Parent=Osjap03g00710.1
chr03	blat	CDS	483193	483351	159	-	.	Parent=Osjap03g00710.1
chr03	blat	CDS	484387	484525	139	-	.	Parent=Osjap03g00710.1
chr03	blat	CDS	484607	484689	83	-	.	Parent=Osjap03g00710.1
chr10	blat	transcript	16961955	16976748	1	-	.	ID=Osjap10g14600;Name=Osjap10g14600.1
chr10	blat	CDS	16961956	16961980	25	-	.	Parent=Osjap10g14600.1
chr10	blat	CDS	16962049	16962149	101	-	.	Parent=Osjap10g14600.1
chr10	blat	CDS	16962336	16962432	97	-	.	Parent=Osjap10g14600.1
chr10	blat	CDS	16963142	16963213	72	-	.	Parent=Osjap10g14600.1
chr10	blat	CDS	16963313	16963435	123	-	.	Parent=Osjap10g14600.1
chr10	blat	CDS	16963522	16963604	83	-	.	Parent=Osjap10g14600.1
chr10	blat	CDS	16963743	16963837	95	-	.	Parent=Osjap10g14600.1
chr10	blat	CDS	16969824	16969954	131	-	.	Parent=Osjap10g14600.1
chr10	blat	CDS	16971192	16971387	196	-	.	Parent=Osjap10g14600.1
chr10	blat	CDS	16971690	16971781	92	-	.	Parent=Osjap10g14600.1
chr10	blat	CDS	16974166	16974339	174	-	.	Parent=Osjap10g14600.1
chr10	blat	CDS	16975189	16975242	54	-	.	Parent=Osjap10g14600.1
chr10	blat	CDS	16975650	16975802	153	-	.	Parent=Osjap10g14600.1
chr10	blat	CDS	16976485	16976748	264	-	.	Parent=Osjap10g14600.1
chr12	blat	transcript	1889359	1902049	1	+	.	ID=Osjap12g02870;Name=Osjap12g02870.1
chr12	blat	CDS	1889360	1889868	722	+	.	Parent=Osjap12g02870.1
chr12	blat	CDS	1891210	1891414	205	+	.	Parent=Osjap12g02870.1
chr12	blat	CDS	1891489	1891569	81	+	.	Parent=Osjap12g02870.1
chr12	blat	CDS	1891707	1891796	90	+	.	Parent=Osjap12g02870.1
chr12	blat	CDS	1891904	1891990	87	+	.	Parent=Osjap12g02870.1
chr12	blat	CDS	1892507	1892607	101	+	.	Parent=Osjap12g02870.1
chr12	blat	CDS	1893195	1893228	34	+	.	Parent=Osjap12g02870.1
chr12	blat	CDS	1893320	1893394	75	+	.	Parent=Osjap12g02870.1
chr12	blat	CDS	1893511	1893594	84	+	.	Parent=Osjap12g02870.1
chr12	blat	CDS	1893675	1893809	135	+	.	Parent=Osjap12g02870.1
chr12	blat	CDS	1894170	1894312	143	+	.	Parent=Osjap12g02870.1
chr12	blat	CDS	1894442	1894547	106	+	.	Parent=Osjap12g02870.1
chr12	blat	CDS	1894679	1894749	71	+	.	Parent=Osjap12g02870.1
chr12	blat	CDS	1895989	1896529	541	+	.	Parent=Osjap12g02870.1
chr12	blat	CDS	1897321	1897467	147	+	.	Parent=Osjap12g02870.1
chr12	blat	CDS	1898450	1898513	64	+	.	Parent=Osjap12g02870.1
chr12	blat	CDS	1899917	1900568	652	+	.	Parent=Osjap12g02870.1
chr12	blat	CDS	1901590	1902049	460	+	.	Parent=Osjap12g02870.1
9311_chr01	StringTie	transcript	13521090	13552555	1000	-	.	Name=Osind01g16020.1;geneID=Osind01g16020
9311_chr01	StringTie	CDS	13521090	13521449	1000	-	.	Parent=Osind01g16020.1
9311_chr01	StringTie	CDS	13521861	13522043	1000	-	.	Parent=Osind01g16020.1
9311_chr01	StringTie	CDS	13552226	13552555	1000	-	.	Parent=Osind01g16020.1
9311_chr02	StringTie	transcript	32947807	32953251	1000	-	.	Name=Osind02g37690.1;geneID=Osind02g37690
9311_chr02	StringTie	CDS	32947807	32949366	1000	-	.	Parent=Osind02g37690.1
9311_chr02	StringTie	CDS	32950058	32950180	1000	-	.	Parent=Osind02g37690.1
9311_chr02	StringTie	CDS	32950731	32950805	1000	-	.	Parent=Osind02g37690.1
9311_chr02	StringTie	CDS	32951021	32951094	1000	-	.	Parent=Osind02g37690.1
9311_chr02	StringTie	CDS	32951494	32951605	1000	-	.	Parent=Osind02g37690.1
9311_chr02	StringTie	CDS	32951788	32951860	1000	-	.	Parent=Osind02g37690.1
9311_chr02	StringTie	CDS	32951986	32952041	1000	-	.	Parent=Osind02g37690.1
9311_chr02	StringTie	CDS	32952357	32952433	1000	-	.	Parent=Osind02g37690.1
9311_chr02	StringTie	CDS	32953110	32953251	1000	-	.	Parent=Osind02g37690.1
9311_chr03	StringTie	transcript	5639422	5644019	1000	-	.	Name=Osind03g07990.1;geneID=Osind03g07990
9311_chr03	StringTie	CDS	5639422	5639769	1000	-	.	Parent=Osind03g07990.1
9311_chr03	StringTie	CDS	5642466	5642484	1000	-	.	Parent=Osind03g07990.1
9311_chr03	StringTie	CDS	5643705	5643908	1000	-	.	Parent=Osind03g07990.1
9311_chr03	StringTie	CDS	5643991	5644019	1000	-	.	Parent=Osind03g07990.1
9311_chr03	StringTie	transcript	21960220	21962953	1000	-	.	Name=Osind03g25560.1;geneID=Osind03g25560
9311_chr03	StringTie	CDS	21960220	21960559	1000	-	.	Parent=Osind03g25560.1
9311_chr03	StringTie	CDS	21960584	21960840	1000	-	.	Parent=Osind03g25560.1
9311_chr03	StringTie	CDS	21961219	21961518	1000	-	.	Parent=Osind03g25560.1
9311_chr03	StringTie	CDS	21962005	21962114	1000	-	.	Parent=Osind03g25560.1
9311_chr03	StringTie	CDS	21962251	21962575	1000	-	.	Parent=Osind03g25560.1
9311_chr03	StringTie	CDS	21962618	21962953	1000	-	.	Parent=Osind03g25560.1
9311_chr04	StringTie	transcript	24024419	24029399	1000	-	.	Name=Osind04g18090.1;geneID=Osind04g18090
9311_chr04	StringTie	CDS	24024419	24026150	1000	-	.	Parent=Osind04g18090.1
9311_chr04	StringTie	CDS	24026620	24026672	1000	-	.	Parent=Osind04g18090.1
9311_chr04	StringTie	CDS	24026780	24026980	1000	-	.	Parent=Osind04g18090.1
9311_chr04	StringTie	CDS	24027088	24027581	1000	-	.	Parent=Osind04g18090.1
9311_chr04	StringTie	CDS	24027677	24027863	1000	-	.	Parent=Osind04g18090.1
9311_chr04	StringTie	CDS	24028385	24028526	1000	-	.	Parent=Osind04g18090.1
9311_chr04	StringTie	CDS	24029316	24029399	1000	-	.	Parent=Osind04g18090.1
9311_chr07	StringTie	transcript	2476790	2487328	1000	-	.	Name=Osind07g03110.1;geneID=Osind07g03110
9311_chr07	StringTie	CDS	2476790	2476825	1000	-	.	Parent=Osind07g03110.1
9311_chr07	StringTie	CDS	2477327	2477392	1000	-	.	Parent=Osind07g03110.1
9311_chr07	StringTie	CDS	2477484	2477514	1000	-	.	Parent=Osind07g03110.1
9311_chr07	StringTie	CDS	2477593	2477959	1000	-	.	Parent=Osind07g03110.1
9311_chr07	StringTie	CDS	2480569	2480689	1000	-	.	Parent=Osind07g03110.1
9311_chr07	StringTie	CDS	2480973	2481098	1000	-	.	Parent=Osind07g03110.1
9311_chr07	StringTie	CDS	2481477	2482367	1000	-	.	Parent=Osind07g03110.1
9311_chr07	StringTie	CDS	2482940	2483263	1000	-	.	Parent=Osind07g03110.1
9311_chr07	StringTie	CDS	2485915	2486078	1000	-	.	Parent=Osind07g03110.1
9311_chr07	StringTie	CDS	2487055	2487328	1000	-	.	Parent=Osind07g03110.1
9311_chr09	StringTie	transcript	20423265	20429343	1000	+	.	Name=Osind09g18210.1;geneID=Osind09g18210
9311_chr09	StringTie	CDS	20423265	20423487	1000	+	.	Parent=Osind09g18210.1
9311_chr09	StringTie	CDS	20425247	20425446	1000	+	.	Parent=Osind09g18210.1
9311_chr09	StringTie	CDS	20426029	20426169	1000	+	.	Parent=Osind09g18210.1
9311_chr09	StringTie	CDS	20426238	20426318	1000	+	.	Parent=Osind09g18210.1
9311_chr09	StringTie	CDS	20426808	20426932	1000	+	.	Parent=Osind09g18210.1
9311_chr09	StringTie	CDS	20427007	20427051	1000	+	.	Parent=Osind09g18210.1
9311_chr09	StringTie	CDS	20428383	20428463	1000	+	.	Parent=Osind09g18210.1
9311_chr09	StringTie	CDS	20428524	20429343	1000	+	.	Parent=Osind09g18210.1
9311_chr10	StringTie	transcript	2480400	2483096	1000	-	.	Name=Osind10g01570.1;geneID=Osind10g01570
9311_chr10	StringTie	CDS	2480400	2480620	1000	-	.	Parent=Osind10g01570.1
9311_chr10	StringTie	CDS	2482814	2483096	1000	-	.	Parent=Osind10g01570.1
9311_chr11	StringTie	transcript	5030768	5034989	1000	+	.	Name=Osind11g05410.1;geneID=Osind11g05410
9311_chr11	StringTie	CDS	5030768	5031206	1000	+	.	Parent=Osind11g05410.1
9311_chr11	StringTie	CDS	5031900	5032601	1000	+	.	Parent=Osind11g05410.1
9311_chr11	StringTie	CDS	5034298	5034989	1000	+	.	Parent=Osind11g05410.1
9311_chr11	StringTie	transcript	12016372	12017752	1000	-	.	Name=Osind11g09560.1;geneID=Osind11g09560
9311_chr11	StringTie	CDS	12016372	12016413	1000	-	.	Parent=Osind11g09560.1
9311_chr11	StringTie	CDS	12016813	12016905	1000	-	.	Parent=Osind11g09560.1
9311_chr11	StringTie	CDS	12016998	12017108	1000	-	.	Parent=Osind11g09560.1
9311_chr11	StringTie	CDS	12017651	12017752	1000	-	.	Parent=Osind11g09560.1
9311_chr11	StringTie	transcript	24511543	24514564	1000	+	.	Name=Osind11g15920.1;geneID=Osind11g15920
9311_chr11	StringTie	CDS	24511543	24511672	1000	+	.	Parent=Osind11g15920.1
9311_chr11	StringTie	CDS	24512839	24513254	1000	+	.	Parent=Osind11g15920.1
9311_chr11	StringTie	CDS	24513283	24513637	1000	+	.	Parent=Osind11g15920.1
9311_chr11	StringTie	CDS	24514254	24514564	1000	+	.	Parent=Osind11g15920.1
9311_chr11	StringTie	transcript	24897212	24910488	1000	-	.	Name=Osind03g03640.1;geneID=Osind03g03640
9311_chr11	StringTie	CDS	24897212	24898192	1000	-	.	Parent=Osind03g03640.1
9311_chr11	StringTie	CDS	24898535	24898741	1000	-	.	Parent=Osind03g03640.1
9311_chr11	StringTie	CDS	24901217	24901915	1000	-	.	Parent=Osind03g03640.1
9311_chr11	StringTie	CDS	24902669	24902818	1000	-	.	Parent=Osind03g03640.1
9311_chr11	StringTie	CDS	24903859	24903990	1000	-	.	Parent=Osind03g03640.1
9311_chr11	StringTie	CDS	24904140	24904205	1000	-	.	Parent=Osind03g03640.1
9311_chr11	StringTie	CDS	24905061	24905123	1000	-	.	Parent=Osind03g03640.1
9311_chr11	StringTie	CDS	24906470	24907228	1000	-	.	Parent=Osind03g03640.1
9311_chr11	StringTie	CDS	24907289	24907566	1000	-	.	Parent=Osind03g03640.1
9311_chr11	StringTie	CDS	24909243	24910488	1000	-	.	Parent=Osind03g03640.1
9311_chr11	StringTie	transcript	25251374	25254899	1000	+	.	Name=Osind11g17120.1;geneID=Osind11g17120
9311_chr11	StringTie	CDS	25251374	25251696	1000	+	.	Parent=Osind11g17120.1
9311_chr11	StringTie	CDS	25252244	25252391	1000	+	.	Parent=Osind11g17120.1
9311_chr11	StringTie	CDS	25254597	25254899	1000	+	.	Parent=Osind11g17120.1
9311_chr01	StringTie	transcript	45573933	45579244	1	-	.	Name=Osind01g52750.1;geneID=Osind01g52750
9311_chr01	StringTie	CDS	45573933	45574049	117	-	.	Parent=Osind01g52750.1
9311_chr01	StringTie	CDS	45574142	45574247	106	-	.	Parent=Osind01g52750.1
9311_chr01	StringTie	CDS	45578983	45579244	262	-	.	Parent=Osind01g52750.1
9311_chr11	StringTie	transcript	29095607	29102381	1	+	.	Name=Osind02g37310.1;geneID=Osind02g37310
9311_chr11	StringTie	CDS	29095607	29095777	170	+	.	Parent=Osind02g37310.1
9311_chr11	StringTie	CDS	29095785	29096068	283	+	.	Parent=Osind02g37310.1
9311_chr11	StringTie	CDS	29096658	29096720	62	+	.	Parent=Osind02g37310.1
9311_chr11	StringTie	CDS	29097293	29097426	133	+	.	Parent=Osind02g37310.1
9311_chr11	StringTie	CDS	29098478	29098737	259	+	.	Parent=Osind02g37310.1
9311_chr11	StringTie	CDS	29098924	29099029	105	+	.	Parent=Osind02g37310.1
9311_chr11	StringTie	CDS	29099409	29099486	77	+	.	Parent=Osind02g37310.1
9311_chr11	StringTie	CDS	29100522	29100582	60	+	.	Parent=Osind02g37310.1
9311_chr11	StringTie	CDS	29100691	29100733	42	+	.	Parent=Osind02g37310.1
9311_chr11	StringTie	CDS	29100815	29100875	60	+	.	Parent=Osind02g37310.1
9311_chr11	StringTie	CDS	29101013	29101634	621	+	.	Parent=Osind02g37310.1
9311_chr11	StringTie	CDS	29101748	29101884	136	+	.	Parent=Osind02g37310.1
9311_chr11	StringTie	CDS	29102100	29102168	68	+	.	Parent=Osind02g37310.1
9311_chr11	StringTie	CDS	29102244	29102382	138	+	.	Parent=Osind02g37310.1
9311_chr02	StringTie	transcript	34274165	34293772	1	-	.	Name=Osind02g39460.2;geneID=Osind02g39460
9311_chr02	StringTie	CDS	34274165	34274305	141	-	.	Parent=Osind02g39460.2
9311_chr02	StringTie	CDS	34274351	34274687	337	-	.	Parent=Osind02g39460.2
9311_chr02	StringTie	CDS	34275844	34275887	44	-	.	Parent=Osind02g39460.2
9311_chr02	StringTie	CDS	34275986	34276135	150	-	.	Parent=Osind02g39460.2
9311_chr02	StringTie	CDS	34277048	34277194	147	-	.	Parent=Osind02g39460.2
9311_chr02	StringTie	CDS	34277275	34277362	88	-	.	Parent=Osind02g39460.2
9311_chr02	StringTie	CDS	34278465	34278610	146	-	.	Parent=Osind02g39460.2
9311_chr02	StringTie	CDS	34278757	34278985	229	-	.	Parent=Osind02g39460.2
9311_chr02	StringTie	CDS	34279089	34279389	301	-	.	Parent=Osind02g39460.2
9311_chr02	StringTie	CDS	34282311	34282457	147	-	.	Parent=Osind02g39460.2
9311_chr02	StringTie	CDS	34282850	34283179	330	-	.	Parent=Osind02g39460.2
9311_chr02	StringTie	CDS	34283692	34283765	74	-	.	Parent=Osind02g39460.2
9311_chr02	StringTie	CDS	34283984	34284018	35	-	.	Parent=Osind02g39460.2
9311_chr02	StringTie	CDS	34284600	34284764	165	-	.	Parent=Osind02g39460.2
9311_chr02	StringTie	CDS	34285231	34285310	80	-	.	Parent=Osind02g39460.2
9311_chr02	StringTie	CDS	34289226	34289370	145	-	.	Parent=Osind02g39460.2
9311_chr02	StringTie	CDS	34289661	34289807	147	-	.	Parent=Osind02g39460.2
9311_chr02	StringTie	CDS	34289930	34290142	213	-	.	Parent=Osind02g39460.2
9311_chr02	StringTie	CDS	34290794	34290979	186	-	.	Parent=Osind02g39460.2
9311_chr02	StringTie	CDS	34291588	34291669	82	-	.	Parent=Osind02g39460.2
9311_chr02	StringTie	CDS	34292462	34292826	365	-	.	Parent=Osind02g39460.2
9311_chr02	StringTie	CDS	34293515	34293661	147	-	.	Parent=Osind02g39460.2
9311_chr02	StringTie	CDS	34293740	34293772	33	-	.	Parent=Osind02g39460.2
9311_chr03	StringTie	transcript	27699425	27701205	.	-	.	Name=Osind03g30900.1;geneID=Osind03g30900
9311_chr03	StringTie	CDS	27699426	27701204	51	-	.	Parent=Osind03g30900.1
9311_chr05	StringTie	transcript	2910943	2917082	1	-	.	Name=Osind05g03420.1;geneID=Osind05g03420
9311_chr05	StringTie	CDS	2910943	2911161	219	-	.	Parent=Osind05g03420.1
9311_chr05	StringTie	CDS	2911281	2911495	215	-	.	Parent=Osind05g03420.1
9311_chr05	StringTie	CDS	2911780	2911996	217	-	.	Parent=Osind05g03420.1
9311_chr05	StringTie	CDS	2912602	2912731	130	-	.	Parent=Osind05g03420.1
9311_chr05	StringTie	CDS	2912966	2913084	119	-	.	Parent=Osind05g03420.1
9311_chr05	StringTie	CDS	2913164	2913271	108	-	.	Parent=Osind05g03420.1
9311_chr05	StringTie	CDS	2913356	2913424	69	-	.	Parent=Osind05g03420.1
9311_chr05	StringTie	CDS	2913728	2913822	95	-	.	Parent=Osind05g03420.1
9311_chr05	StringTie	CDS	2913907	2914111	205	-	.	Parent=Osind05g03420.1
9311_chr05	StringTie	CDS	2914292	2914378	87	-	.	Parent=Osind05g03420.1
9311_chr05	StringTie	CDS	2914458	2914572	115	-	.	Parent=Osind05g03420.1
9311_chr05	StringTie	CDS	2914863	2914969	107	-	.	Parent=Osind05g03420.1
9311_chr05	StringTie	CDS	2915221	2915313	93	-	.	Parent=Osind05g03420.1
9311_chr05	StringTie	CDS	2915410	2915457	48	-	.	Parent=Osind05g03420.1
9311_chr05	StringTie	CDS	2915512	2915711	200	-	.	Parent=Osind05g03420.1
9311_chr05	StringTie	CDS	2916160	2916295	136	-	.	Parent=Osind05g03420.1
9311_chr05	StringTie	CDS	2916395	2916458	64	-	.	Parent=Osind05g03420.1
9311_chr05	StringTie	CDS	2916949	2917082	134	-	.	Parent=Osind05g03420.1
9311_chr06	StringTie	transcript	28128508	28132012	1	+	.	Name=Osind06g27610.1;geneID=Osind06g27610
9311_chr06	StringTie	CDS	28128508	28128722	215	+	.	Parent=Osind06g27610.1
9311_chr06	StringTie	CDS	28129381	28129456	76	+	.	Parent=Osind06g27610.1
9311_chr06	StringTie	CDS	28129594	28129758	165	+	.	Parent=Osind06g27610.1
9311_chr06	StringTie	CDS	28129920	28129961	42	+	.	Parent=Osind06g27610.1
9311_chr06	StringTie	CDS	28130053	28130094	42	+	.	Parent=Osind06g27610.1
9311_chr06	StringTie	CDS	28130460	28130742	283	+	.	Parent=Osind06g27610.1
9311_chr06	StringTie	CDS	28130773	28130813	41	+	.	Parent=Osind06g27610.1
9311_chr06	StringTie	CDS	28130881	28131002	122	+	.	Parent=Osind06g27610.1
9311_chr06	StringTie	CDS	28131409	28131424	16	+	.	Parent=Osind06g27610.1
9311_chr06	StringTie	CDS	28131839	28132012	174	+	.	Parent=Osind06g27610.1
9311_chr07	StringTie	transcript	26037712	26061116	1	+	.	Name=Osind07g25180.1;geneID=Osind07g25180
9311_chr07	StringTie	CDS	26037712	26037974	263	+	.	Parent=Osind07g25180.1
9311_chr07	StringTie	CDS	26038164	26038377	214	+	.	Parent=Osind07g25180.1
9311_chr07	StringTie	CDS	26038907	26039011	105	+	.	Parent=Osind07g25180.1
9311_chr07	StringTie	CDS	26039176	26039484	309	+	.	Parent=Osind07g25180.1
9311_chr07	StringTie	CDS	26059710	26059826	117	+	.	Parent=Osind07g25180.1
9311_chr07	StringTie	CDS	26060238	26060330	93	+	.	Parent=Osind07g25180.1
9311_chr07	StringTie	CDS	26060676	26060706	31	+	.	Parent=Osind07g25180.1
9311_chr07	StringTie	CDS	26060947	26061116	170	+	.	Parent=Osind07g25180.1
9311_chr07	StringTie	transcript	27408896	27420882	1	+	.	Name=Osind07g27190.1;geneID=Osind07g27190
9311_chr07	StringTie	CDS	27408896	27409171	276	+	.	Parent=Osind07g27190.1
9311_chr07	StringTie	CDS	27409292	27409404	113	+	.	Parent=Osind07g27190.1
9311_chr07	StringTie	CDS	27409849	27409924	76	+	.	Parent=Osind07g27190.1
9311_chr07	StringTie	CDS	27410023	27410165	143	+	.	Parent=Osind07g27190.1
9311_chr07	StringTie	CDS	27410380	27410466	87	+	.	Parent=Osind07g27190.1
9311_chr07	StringTie	CDS	27410575	27410658	84	+	.	Parent=Osind07g27190.1
9311_chr07	StringTie	CDS	27411307	27411463	157	+	.	Parent=Osind07g27190.1
9311_chr07	StringTie	CDS	27411604	27411689	86	+	.	Parent=Osind07g27190.1
9311_chr07	StringTie	CDS	27412078	27412309	232	+	.	Parent=Osind07g27190.1
9311_chr07	StringTie	CDS	27412434	27412554	121	+	.	Parent=Osind07g27190.1
9311_chr07	StringTie	CDS	27412693	27412829	137	+	.	Parent=Osind07g27190.1
9311_chr07	StringTie	CDS	27413169	27413285	117	+	.	Parent=Osind07g27190.1
9311_chr07	StringTie	CDS	27413695	27413743	49	+	.	Parent=Osind07g27190.1
9311_chr07	StringTie	CDS	27413834	27413876	43	+	.	Parent=Osind07g27190.1
9311_chr07	StringTie	CDS	27414028	27414199	172	+	.	Parent=Osind07g27190.1
9311_chr07	StringTie	CDS	27414275	27414345	71	+	.	Parent=Osind07g27190.1
9311_chr07	StringTie	CDS	27414448	27414541	94	+	.	Parent=Osind07g27190.1
9311_chr07	StringTie	CDS	27414691	27414903	213	+	.	Parent=Osind07g27190.1
9311_chr07	StringTie	CDS	27414934	27414942	9	+	.	Parent=Osind07g27190.1
9311_chr07	StringTie	CDS	27414978	27415082	105	+	.	Parent=Osind07g27190.1
9311_chr07	StringTie	CDS	27415349	27415669	321	+	.	Parent=Osind07g27190.1
9311_chr07	StringTie	CDS	27415748	27415837	90	+	.	Parent=Osind07g27190.1
9311_chr07	StringTie	CDS	27417262	27417333	72	+	.	Parent=Osind07g27190.1
9311_chr07	StringTie	CDS	27417734	27417830	97	+	.	Parent=Osind07g27190.1
9311_chr07	StringTie	CDS	27418298	27418359	62	+	.	Parent=Osind07g27190.1
9311_chr07	StringTie	CDS	27418829	27419127	299	+	.	Parent=Osind07g27190.1
9311_chr07	StringTie	CDS	27419407	27419764	358	+	.	Parent=Osind07g27190.1
9311_chr07	StringTie	CDS	27419856	27420398	543	+	.	Parent=Osind07g27190.1
9311_chr07	StringTie	CDS	27420601	27420882	282	+	.	Parent=Osind07g27190.1
9311_chr06	StringTie	transcript	7751126	7762532	1	-	.	Name=Osind08g03120.1;geneID=Osind08g03120
9311_chr06	StringTie	CDS	7751126	7751488	363	-	.	Parent=Osind08g03120.1
9311_chr06	StringTie	CDS	7753798	7753850	53	-	.	Parent=Osind08g03120.1
9311_chr06	StringTie	CDS	7754077	7754128	52	-	.	Parent=Osind08g03120.1
9311_chr06	StringTie	CDS	7754813	7755169	357	-	.	Parent=Osind08g03120.1
9311_chr06	StringTie	CDS	7756001	7756159	159	-	.	Parent=Osind08g03120.1
9311_chr06	StringTie	CDS	7757429	7757509	81	-	.	Parent=Osind08g03120.1
9311_chr06	StringTie	CDS	7757773	7757885	113	-	.	Parent=Osind08g03120.1
9311_chr06	StringTie	CDS	7757980	7758135	156	-	.	Parent=Osind08g03120.1
9311_chr06	StringTie	CDS	7758379	7758568	190	-	.	Parent=Osind08g03120.1
9311_chr06	StringTie	CDS	7758653	7758862	210	-	.	Parent=Osind08g03120.1
9311_chr06	StringTie	CDS	7759670	7759830	161	-	.	Parent=Osind08g03120.1
9311_chr06	StringTie	CDS	7760058	7760605	548	-	.	Parent=Osind08g03120.1
9311_chr06	StringTie	CDS	7761074	7761123	50	-	.	Parent=Osind08g03120.1
9311_chr06	StringTie	CDS	7761346	7761415	70	-	.	Parent=Osind08g03120.1
9311_chr06	StringTie	CDS	7761987	7762096	110	-	.	Parent=Osind08g03120.1
9311_chr06	StringTie	CDS	7762220	7762265	46	-	.	Parent=Osind08g03120.1
9311_chr06	StringTie	CDS	7762351	7762532	182	-	.	Parent=Osind08g03120.1
9311_chr08	StringTie	transcript	5666493	5677854	1	-	.	Name=Osind08g06190.1;geneID=Osind08g06190
9311_chr08	StringTie	CDS	5666493	5666521	29	-	.	Parent=Osind08g06190.1
9311_chr08	StringTie	CDS	5666622	5666951	330	-	.	Parent=Osind08g06190.1
9311_chr08	StringTie	CDS	5666971	5667942	972	-	.	Parent=Osind08g06190.1
9311_chr08	StringTie	CDS	5667981	5668456	476	-	.	Parent=Osind08g06190.1
9311_chr08	StringTie	CDS	5669400	5669501	102	-	.	Parent=Osind08g06190.1
9311_chr08	StringTie	CDS	5669591	5670170	580	-	.	Parent=Osind08g06190.1
9311_chr08	StringTie	CDS	5672497	5673204	708	-	.	Parent=Osind08g06190.1
9311_chr08	StringTie	CDS	5673759	5674065	307	-	.	Parent=Osind08g06190.1
9311_chr08	StringTie	CDS	5674626	5674814	189	-	.	Parent=Osind08g06190.1
9311_chr08	StringTie	CDS	5674930	5675318	389	-	.	Parent=Osind08g06190.1
9311_chr08	StringTie	CDS	5675745	5675833	89	-	.	Parent=Osind08g06190.1
9311_chr08	StringTie	CDS	5676752	5676803	52	-	.	Parent=Osind08g06190.1
9311_chr08	StringTie	CDS	5677102	5677203	102	-	.	Parent=Osind08g06190.1
9311_chr08	StringTie	CDS	5677284	5677854	571	-	.	Parent=Osind08g06190.1
9311_chr08	StringTie	transcript	24641884	24653044	1	-	.	Name=Osind08g20190.1;geneID=Osind08g20190
9311_chr08	StringTie	CDS	24641884	24642165	282	-	.	Parent=Osind08g20190.1
9311_chr08	StringTie	CDS	24652967	24653044	78	-	.	Parent=Osind08g20190.1
9311_chr08	StringTie	transcript	30831492	30832525	1	+	.	Name=Osind08g27620.1;geneID=Osind08g27620
9311_chr08	StringTie	CDS	30831492	30831611	120	+	.	Parent=Osind08g27620.1
9311_chr08	StringTie	CDS	30832071	30832118	48	+	.	Parent=Osind08g27620.1
9311_chr08	StringTie	CDS	30832373	30832525	153	+	.	Parent=Osind08g27620.1
9311_chr08	StringTie	transcript	27809485	27813165	1	+	.	Name=Osind08g23660.1;geneID=Osind08g23660
9311_chr08	StringTie	CDS	27809485	27809613	129	+	.	Parent=Osind08g23660.1
9311_chr08	StringTie	CDS	27809673	27809914	242	+	.	Parent=Osind08g23660.1
9311_chr08	StringTie	CDS	27811977	27812122	146	+	.	Parent=Osind08g23660.1
9311_chr08	StringTie	CDS	27812127	27812139	13	+	.	Parent=Osind08g23660.1
9311_chr08	StringTie	CDS	27812884	27813064	181	+	.	Parent=Osind08g23660.1
9311_chr08	StringTie	CDS	27813106	27813165	60	+	.	Parent=Osind08g23660.1
9311_chr08	StringTie	transcript	28668324	28671383	1	+	.	Name=Osind08g24880.1;geneID=Osind08g24880
9311_chr08	StringTie	CDS	28668325	28668328	5	+	.	Parent=Osind08g24880.1
9311_chr08	StringTie	CDS	28668331	28668335	5	+	.	Parent=Osind08g24880.1
9311_chr08	StringTie	CDS	28668337	28668600	264	+	.	Parent=Osind08g24880.1
9311_chr08	StringTie	CDS	28669293	28669354	62	+	.	Parent=Osind08g24880.1
9311_chr08	StringTie	CDS	28669462	28669754	293	+	.	Parent=Osind08g24880.1
9311_chr08	StringTie	CDS	28670292	28670354	63	+	.	Parent=Osind08g24880.1
9311_chr08	StringTie	CDS	28671309	28671383	75	+	.	Parent=Osind08g24880.1
9311_chr09	StringTie	transcript	15414535	15434343	1	+	.	Name=Osind09g11870.1;geneID=Osind09g11870
9311_chr09	StringTie	CDS	15414535	15414801	267	+	.	Parent=Osind09g11870.1
9311_chr09	StringTie	CDS	15433810	15434010	201	+	.	Parent=Osind09g11870.1
9311_chr09	StringTie	CDS	15434101	15434343	243	+	.	Parent=Osind09g11870.1
9311_chr10	StringTie	transcript	2286001	2311070	1	+	.	Name=Osind10g01380.1;geneID=Osind10g01380
9311_chr10	StringTie	CDS	2286001	2287166	1166	+	.	Parent=Osind10g01380.1
9311_chr10	StringTie	CDS	2287636	2287654	19	+	.	Parent=Osind10g01380.1
9311_chr10	StringTie	CDS	2288563	2288643	81	+	.	Parent=Osind10g01380.1
9311_chr10	StringTie	CDS	2294060	2295270	1211	+	.	Parent=Osind10g01380.1
9311_chr10	StringTie	CDS	2299096	2299794	699	+	.	Parent=Osind10g01380.1
9311_chr10	StringTie	CDS	2306348	2306603	256	+	.	Parent=Osind10g01380.1
9311_chr10	StringTie	CDS	2307460	2307489	30	+	.	Parent=Osind10g01380.1
9311_chr10	StringTie	CDS	2308220	2308328	109	+	.	Parent=Osind10g01380.1
9311_chr10	StringTie	CDS	2308428	2308574	147	+	.	Parent=Osind10g01380.1
9311_chr10	StringTie	CDS	2309470	2309600	131	+	.	Parent=Osind10g01380.1
9311_chr10	StringTie	CDS	2309676	2309813	138	+	.	Parent=Osind10g01380.1
9311_chr10	StringTie	CDS	2310229	2310327	99	+	.	Parent=Osind10g01380.1
9311_chr10	StringTie	CDS	2310840	2311070	231	+	.	Parent=Osind10g01380.1
9311_chr12	StringTie	transcript	1836693	1837453	.	+	.	Name=Osind11g02250.1;geneID=Osind11g02250
9311_chr12	StringTie	CDS	1836692	1837453	.	+	.	Parent=Osind11g02250.1
9311_chr01	StringTie	transcript	8971733	8978534	1	-	.	Name=Osind01g11290.1;geneID=Osind01g11290
9311_chr01	StringTie	CDS	8971733	8972297	565	-	.	Parent=Osind01g11290.1
9311_chr01	StringTie	CDS	8972303	8972334	32	-	.	Parent=Osind01g11290.1
9311_chr01	StringTie	CDS	8975291	8975391	101	-	.	Parent=Osind01g11290.1
9311_chr01	StringTie	CDS	8975511	8975668	158	-	.	Parent=Osind01g11290.1
9311_chr01	StringTie	CDS	8975817	8975891	75	-	.	Parent=Osind01g11290.1
9311_chr01	StringTie	CDS	8976854	8976930	77	-	.	Parent=Osind01g11290.1
9311_chr01	StringTie	CDS	8977547	8977640	94	-	.	Parent=Osind01g11290.1
9311_chr01	StringTie	CDS	8978326	8978534	209	-	.	Parent=Osind01g11290.1
9311_chr01	StringTie	transcript	13086602	13091476	1	-	.	Name=Osind01g15760.1;geneID=Osind01g15760
9311_chr01	StringTie	CDS	13086602	13086617	16	-	.	Parent=Osind01g15760.1
9311_chr01	StringTie	CDS	13086749	13086830	82	-	.	Parent=Osind01g15760.1
9311_chr01	StringTie	CDS	13086937	13087046	110	-	.	Parent=Osind01g15760.1
9311_chr01	StringTie	CDS	13087148	13087173	26	-	.	Parent=Osind01g15760.1
9311_chr01	StringTie	CDS	13090893	13091043	151	-	.	Parent=Osind01g15760.1
9311_chr01	StringTie	CDS	13091085	13091476	392	-	.	Parent=Osind01g15760.1
9311_chr01	StringTie	transcript	26652702	26655499	1	-	.	Name=Osind01g28070.1;geneID=Osind01g28070
9311_chr01	StringTie	CDS	26652702	26653970	1269	-	.	Parent=Osind01g28070.1
9311_chr01	StringTie	CDS	26655020	26655271	252	-	.	Parent=Osind01g28070.1
9311_chr01	StringTie	CDS	26655338	26655499	162	-	.	Parent=Osind01g28070.1
9311_chr02	StringTie	transcript	23456751	23466475	1	-	.	Name=Osind02g25330.1;geneID=Osind02g25330
9311_chr02	StringTie	CDS	23456751	23456993	243	-	.	Parent=Osind02g25330.1
9311_chr02	StringTie	CDS	23457214	23457529	316	-	.	Parent=Osind02g25330.1
9311_chr02	StringTie	CDS	23457613	23457955	343	-	.	Parent=Osind02g25330.1
9311_chr02	StringTie	CDS	23462616	23462864	249	-	.	Parent=Osind02g25330.1
9311_chr02	StringTie	CDS	23463021	23463206	186	-	.	Parent=Osind02g25330.1
9311_chr02	StringTie	CDS	23463907	23464009	103	-	.	Parent=Osind02g25330.1
9311_chr02	StringTie	CDS	23464429	23464569	141	-	.	Parent=Osind02g25330.1
9311_chr02	StringTie	CDS	23465144	23465204	61	-	.	Parent=Osind02g25330.1
9311_chr02	StringTie	CDS	23465449	23465570	122	-	.	Parent=Osind02g25330.1
9311_chr02	StringTie	CDS	23466008	23466235	228	-	.	Parent=Osind02g25330.1
9311_chr02	StringTie	CDS	23466332	23466475	144	-	.	Parent=Osind02g25330.1
9311_chr03	StringTie	transcript	12438261	12450089	1	-	.	Name=Osind03g16830.1;geneID=Osind03g16830
9311_chr03	StringTie	CDS	12438261	12438352	92	-	.	Parent=Osind03g16830.1
9311_chr03	StringTie	CDS	12438469	12438535	67	-	.	Parent=Osind03g16830.1
9311_chr03	StringTie	CDS	12438929	12439018	90	-	.	Parent=Osind03g16830.1
9311_chr03	StringTie	CDS	12439095	12439148	54	-	.	Parent=Osind03g16830.1
9311_chr03	StringTie	CDS	12439290	12439350	61	-	.	Parent=Osind03g16830.1
9311_chr03	StringTie	CDS	12439433	12439500	68	-	.	Parent=Osind03g16830.1
9311_chr03	StringTie	CDS	12439694	12439777	84	-	.	Parent=Osind03g16830.1
9311_chr03	StringTie	CDS	12440438	12440530	93	-	.	Parent=Osind03g16830.1
9311_chr03	StringTie	CDS	12440694	12440774	81	-	.	Parent=Osind03g16830.1
9311_chr03	StringTie	CDS	12441374	12441454	81	-	.	Parent=Osind03g16830.1
9311_chr03	StringTie	CDS	12441582	12441665	84	-	.	Parent=Osind03g16830.1
9311_chr03	StringTie	CDS	12442950	12443023	74	-	.	Parent=Osind03g16830.1
9311_chr03	StringTie	CDS	12443662	12443933	272	-	.	Parent=Osind03g16830.1
9311_chr03	StringTie	CDS	12445853	12446548	696	-	.	Parent=Osind03g16830.1
9311_chr03	StringTie	CDS	12447037	12447262	226	-	.	Parent=Osind03g16830.1
9311_chr03	StringTie	CDS	12447969	12448027	59	-	.	Parent=Osind03g16830.1
9311_chr03	StringTie	CDS	12448051	12448182	132	-	.	Parent=Osind03g16830.1
9311_chr03	StringTie	CDS	12448482	12448559	78	-	.	Parent=Osind03g16830.1
9311_chr03	StringTie	CDS	12448775	12450089	1315	-	.	Parent=Osind03g16830.1
9311_chr01	GLEAN	mRNA	5145013	5149734	0.968776	-	.	Name=Os9311_01g045650.1;_Description=9311_GLEAN_10036127.1;ID=Os9311_01g045650.1
9311_chr01	GLEAN	CDS	5149657	5149734	.	-	0	ID=Os9311_01g045650.1:cds.1;Parent=Os9311_01g045650.1
9311_chr01	GLEAN	CDS	5147933	5148184	.	-	0	ID=Os9311_01g045650.1:cds.2;Parent=Os9311_01g045650.1
9311_chr01	GLEAN	CDS	5147663	5147848	.	-	0	ID=Os9311_01g045650.1:cds.3;Parent=Os9311_01g045650.1
9311_chr01	GLEAN	CDS	5147009	5147118	.	-	0	ID=Os9311_01g045650.1:cds.4;Parent=Os9311_01g045650.1
9311_chr01	GLEAN	CDS	5146424	5146532	.	-	1	ID=Os9311_01g045650.1:cds.5;Parent=Os9311_01g045650.1
9311_chr01	GLEAN	CDS	5146080	5146235	.	-	0	ID=Os9311_01g045650.1:cds.6;Parent=Os9311_01g045650.1
9311_chr01	GLEAN	CDS	5145804	5145919	.	-	0	ID=Os9311_01g045650.1:cds.7;Parent=Os9311_01g045650.1
9311_chr01	GLEAN	CDS	5145473	5145639	.	-	1	ID=Os9311_01g045650.1:cds.8;Parent=Os9311_01g045650.1
9311_chr01	GLEAN	CDS	5145218	5145348	.	-	2	ID=Os9311_01g045650.1:cds.9;Parent=Os9311_01g045650.1
9311_chr01	GLEAN	mRNA	20121031	20134719	0.54416	+	.	Name=Os9311_01g114650.1;Parent=Os9311_01g114650
9311_chr01	GLEAN	CDS	20121031	20121255	.	+	0	ID=Os9311_01g114650.1:cds.1;Parent=Os9311_01g114650.1
9311_chr01	GLEAN	CDS	20123130	20123477	.	+	0	ID=Os9311_01g114650.1:cds.2;Parent=Os9311_01g114650.1
9311_chr01	GLEAN	CDS	20123661	20123876	.	+	0	ID=Os9311_01g114650.1:cds.3;Parent=Os9311_01g114650.1
9311_chr01	GLEAN	CDS	20126422	20127071	.	+	0	ID=Os9311_01g114650.1:cds.4;Parent=Os9311_01g114650.1
9311_chr01	GLEAN	CDS	20127855	20127951	.	+	1	ID=Os9311_01g114650.1:cds.5;Parent=Os9311_01g114650.1
9311_chr01	GLEAN	CDS	20128032	20128085	.	+	0	ID=Os9311_01g114650.1:cds.6;Parent=Os9311_01g114650.1
9311_chr01	GLEAN	CDS	20128167	20128297	.	+	0	ID=Os9311_01g114650.1:cds.7;Parent=Os9311_01g114650.1
9311_chr01	GLEAN	CDS	20132962	20133152	.	+	1	ID=Os9311_01g114650.1:cds.8;Parent=Os9311_01g114650.1
9311_chr01	GLEAN	CDS	20134082	20134719	.	+	2	ID=Os9311_01g114650.1:cds.9;Parent=Os9311_01g114650.1
9311_chr01	GLEAN	mRNA	45601956	45606204	0.999198	-	.	Name=Os9311_01g266050.1;Parent=Os9311_01g266050
9311_chr01	GLEAN	CDS	45605260	45606204	.	-	0	ID=Os9311_01g266050.1:cds.1;Parent=Os9311_01g266050.1
9311_chr01	GLEAN	CDS	45604341	45604442	.	-	0	ID=Os9311_01g266050.1:cds.2;Parent=Os9311_01g266050.1
9311_chr01	GLEAN	CDS	45604064	45604239	.	-	0	ID=Os9311_01g266050.1:cds.3;Parent=Os9311_01g266050.1
9311_chr01	GLEAN	CDS	45603750	45603870	.	-	1	ID=Os9311_01g266050.1:cds.4;Parent=Os9311_01g266050.1
9311_chr01	GLEAN	CDS	45603443	45603511	.	-	0	ID=Os9311_01g266050.1:cds.5;Parent=Os9311_01g266050.1
9311_chr01	GLEAN	CDS	45601956	45602189	.	-	0	ID=Os9311_01g266050.1:cds.6;Parent=Os9311_01g266050.1
9311_chr02	GLEAN	mRNA	33473702	33477524	0.451966	-	.	Name=Os9311_02g184550.1;Parent=Os9311_02g184550
9311_chr02	GLEAN	CDS	33477030	33477524	.	-	0	ID=Os9311_02g184550.1:cds.1;Parent=Os9311_02g184550.1
9311_chr02	GLEAN	CDS	33476500	33476984	.	-	0	ID=Os9311_02g184550.1:cds.2;Parent=Os9311_02g184550.1
9311_chr02	GLEAN	CDS	33473968	33474538	.	-	1	ID=Os9311_02g184550.1:cds.3;Parent=Os9311_02g184550.1
9311_chr02	GLEAN	CDS	33473702	33473950	.	-	0	ID=Os9311_02g184550.1:cds.4;Parent=Os9311_02g184550.1
9311_chr03	GLEAN	mRNA	30797282	30799556	1	-	.	Name=Os9311_03g171950.1;Parent=Os9311_03g171950
9311_chr03	GLEAN	CDS	30799094	30799556	.	-	0	ID=Os9311_03g171950.1:cds.1;Parent=Os9311_03g171950.1
9311_chr03	GLEAN	CDS	30797282	30797739	.	-	2	ID=Os9311_03g171950.1:cds.2;Parent=Os9311_03g171950.1
9311_chr04	GLEAN	mRNA	36254726	36259843	0.706788	+	.	Name=Os9311_04g175800.1;Parent=Os9311_04g175800
9311_chr04	GLEAN	CDS	36254726	36255184	.	+	0	ID=Os9311_04g175800.1:cds.1;Parent=Os9311_04g175800.1
9311_chr04	GLEAN	CDS	36255620	36255751	.	+	0	ID=Os9311_04g175800.1:cds.2;Parent=Os9311_04g175800.1
9311_chr04	GLEAN	CDS	36256838	36257228	.	+	0	ID=Os9311_04g175800.1:cds.3;Parent=Os9311_04g175800.1
9311_chr04	GLEAN	CDS	36258324	36258412	.	+	2	ID=Os9311_04g175800.1:cds.4;Parent=Os9311_04g175800.1
9311_chr04	GLEAN	CDS	36259382	36259843	.	+	0	ID=Os9311_04g175800.1:cds.5;Parent=Os9311_04g175800.1
9311_chr05	GLEAN	mRNA	19219573	19226133	0.795723	+	.	Name=Os9311_05g088200.1;Parent=Os9311_05g088200
9311_chr05	GLEAN	CDS	19219573	19219729	.	+	0	ID=Os9311_05g088200.1:cds.1;Parent=Os9311_05g088200.1
9311_chr05	GLEAN	CDS	19219856	19219926	.	+	2	ID=Os9311_05g088200.1:cds.2;Parent=Os9311_05g088200.1
9311_chr05	GLEAN	CDS	19222699	19222872	.	+	0	ID=Os9311_05g088200.1:cds.3;Parent=Os9311_05g088200.1
9311_chr05	GLEAN	CDS	19222981	19223160	.	+	0	ID=Os9311_05g088200.1:cds.4;Parent=Os9311_05g088200.1
9311_chr05	GLEAN	CDS	19223271	19223325	.	+	0	ID=Os9311_05g088200.1:cds.5;Parent=Os9311_05g088200.1
9311_chr05	GLEAN	CDS	19223592	19223719	.	+	2	ID=Os9311_05g088200.1:cds.6;Parent=Os9311_05g088200.1
9311_chr05	GLEAN	CDS	19224179	19224262	.	+	0	ID=Os9311_05g088200.1:cds.7;Parent=Os9311_05g088200.1
9311_chr05	GLEAN	CDS	19225789	19225914	.	+	0	ID=Os9311_05g088200.1:cds.8;Parent=Os9311_05g088200.1
9311_chr05	GLEAN	CDS	19225996	19226133	.	+	0	ID=Os9311_05g088200.1:cds.9;Parent=Os9311_05g088200.1
9311_chr05	GLEAN	mRNA	24036071	24036361	0.999581	+	.	Name=Os9311_05g114250.1;Parent=Os9311_05g114250
9311_chr05	GLEAN	CDS	24036071	24036361	.	+	0	ID=Os9311_05g114250.1:cds.1;Parent=Os9311_05g114250.1
9311_chr07	GLEAN	mRNA	22831706	22832685	0.735988	+	.	Name=Os9311_07g115350.1;Parent=Os9311_07g115350
9311_chr07	GLEAN	CDS	22831706	22831832	.	+	0	ID=Os9311_07g115350.1:cds.1;Parent=Os9311_07g115350.1
9311_chr07	GLEAN	CDS	22832199	22832338	.	+	2	ID=Os9311_07g115350.1:cds.2;Parent=Os9311_07g115350.1
9311_chr07	GLEAN	CDS	22832419	22832685	.	+	0	ID=Os9311_07g115350.1:cds.3;Parent=Os9311_07g115350.1
9311_chr06	GLEAN	mRNA	7754066	7762532	0.552824	-	.	Name=Os9311_06g061100.1;Parent=Os9311_06g061100
9311_chr06	GLEAN	CDS	7762351	7762532	.	-	0	ID=Os9311_06g061100.1:cds.1;Parent=Os9311_06g061100.1
9311_chr06	GLEAN	CDS	7762220	7762265	.	-	1	ID=Os9311_06g061100.1:cds.2;Parent=Os9311_06g061100.1
9311_chr06	GLEAN	CDS	7761987	7762096	.	-	0	ID=Os9311_06g061100.1:cds.3;Parent=Os9311_06g061100.1
9311_chr06	GLEAN	CDS	7760074	7760605	.	-	1	ID=Os9311_06g061100.1:cds.4;Parent=Os9311_06g061100.1
9311_chr06	GLEAN	CDS	7758653	7758862	.	-	0	ID=Os9311_06g061100.1:cds.5;Parent=Os9311_06g061100.1
9311_chr06	GLEAN	CDS	7758379	7758568	.	-	0	ID=Os9311_06g061100.1:cds.6;Parent=Os9311_06g061100.1
9311_chr06	GLEAN	CDS	7757980	7758135	.	-	2	ID=Os9311_06g061100.1:cds.7;Parent=Os9311_06g061100.1
9311_chr06	GLEAN	CDS	7757773	7757885	.	-	2	ID=Os9311_06g061100.1:cds.8;Parent=Os9311_06g061100.1
9311_chr06	GLEAN	CDS	7757429	7757509	.	-	0	ID=Os9311_06g061100.1:cds.9;Parent=Os9311_06g061100.1
9311_chr06	GLEAN	CDS	7754066	7754170	.	-	0	ID=Os9311_06g061100.1:cds.10;Parent=Os9311_06g061100.1
9311_chr12	GLEAN	mRNA	843392	848112	0.994939	-	.	Name=Os9311_12g015500.1;Parent=Os9311_12g015500
9311_chr12	GLEAN	CDS	848093	848112	.	-	0	ID=Os9311_12g015500.1:cds.1;Parent=Os9311_12g015500.1
9311_chr12	GLEAN	CDS	847924	847993	.	-	1	ID=Os9311_12g015500.1:cds.2;Parent=Os9311_12g015500.1
9311_chr12	GLEAN	CDS	846102	847708	.	-	0	ID=Os9311_12g015500.1:cds.3;Parent=Os9311_12g015500.1
9311_chr12	GLEAN	CDS	845024	845630	.	-	1	ID=Os9311_12g015500.1:cds.4;Parent=Os9311_12g015500.1
9311_chr12	GLEAN	CDS	844427	844621	.	-	0	ID=Os9311_12g015500.1:cds.5;Parent=Os9311_12g015500.1
9311_chr12	GLEAN	CDS	844193	844315	.	-	0	ID=Os9311_12g015500.1:cds.6;Parent=Os9311_12g015500.1
9311_chr12	GLEAN	CDS	843888	844099	.	-	0	ID=Os9311_12g015500.1:cds.7;Parent=Os9311_12g015500.1
9311_chr12	GLEAN	CDS	843392	843740	.	-	1	ID=Os9311_12g015500.1:cds.8;Parent=Os9311_12g015500.1
9311_chr12	GLEAN	mRNA	21398371	21404930	0.925659	+	.	Name=Os9311_12g093700.1;Parent=Os9311_12g093700
9311_chr12	GLEAN	CDS	21398371	21398445	.	+	0	ID=Os9311_12g093700.1:cds.1;Parent=Os9311_12g093700.1
9311_chr12	GLEAN	CDS	21398560	21398754	.	+	0	ID=Os9311_12g093700.1:cds.2;Parent=Os9311_12g093700.1
9311_chr12	GLEAN	CDS	21398844	21399145	.	+	0	ID=Os9311_12g093700.1:cds.3;Parent=Os9311_12g093700.1
9311_chr12	GLEAN	CDS	21400768	21400840	.	+	1	ID=Os9311_12g093700.1:cds.4;Parent=Os9311_12g093700.1
9311_chr12	GLEAN	CDS	21401040	21401144	.	+	0	ID=Os9311_12g093700.1:cds.5;Parent=Os9311_12g093700.1
9311_chr12	GLEAN	CDS	21401980	21402243	.	+	0	ID=Os9311_12g093700.1:cds.6;Parent=Os9311_12g093700.1
9311_chr12	GLEAN	CDS	21402322	21402414	.	+	0	ID=Os9311_12g093700.1:cds.7;Parent=Os9311_12g093700.1
9311_chr12	GLEAN	CDS	21402544	21402750	.	+	0	ID=Os9311_12g093700.1:cds.8;Parent=Os9311_12g093700.1
9311_chr12	GLEAN	CDS	21403319	21403422	.	+	0	ID=Os9311_12g093700.1:cds.9;Parent=Os9311_12g093700.1
9311_chr12	GLEAN	CDS	21403600	21403666	.	+	1	ID=Os9311_12g093700.1:cds.10;Parent=Os9311_12g093700.1
9311_chr12	GLEAN	CDS	21403740	21403847	.	+	0	ID=Os9311_12g093700.1:cds.11;Parent=Os9311_12g093700.1
9311_chr12	GLEAN	CDS	21403929	21404021	.	+	0	ID=Os9311_12g093700.1:cds.12;Parent=Os9311_12g093700.1
9311_chr12	GLEAN	CDS	21404107	21404197	.	+	0	ID=Os9311_12g093700.1:cds.13;Parent=Os9311_12g093700.1
9311_chr12	GLEAN	CDS	21404287	21404357	.	+	2	ID=Os9311_12g093700.1:cds.14;Parent=Os9311_12g093700.1
9311_chr12	GLEAN	CDS	21404585	21404713	.	+	0	ID=Os9311_12g093700.1:cds.15;Parent=Os9311_12g093700.1
9311_chr12	GLEAN	CDS	21404823	21404930	.	+	0	ID=Os9311_12g093700.1:cds.16;Parent=Os9311_12g093700.1
9311_chr01	StringTie	transcript	5145013	5148191	1	-	.	Name=Osind01g06920.1;geneID=Osind01g06920
9311_chr01	StringTie	CDS	5145013	5145120	108	-	.	Parent=Osind01g06920.1
9311_chr01	StringTie	CDS	5145218	5145348	131	-	.	Parent=Osind01g06920.1
9311_chr01	StringTie	CDS	5145473	5145639	167	-	.	Parent=Osind01g06920.1
9311_chr01	StringTie	CDS	5145804	5145919	116	-	.	Parent=Osind01g06920.1
9311_chr01	StringTie	CDS	5146080	5146235	156	-	.	Parent=Osind01g06920.1
9311_chr01	StringTie	CDS	5146424	5146532	109	-	.	Parent=Osind01g06920.1
9311_chr01	StringTie	CDS	5147009	5147118	110	-	.	Parent=Osind01g06920.1
9311_chr01	StringTie	CDS	5147663	5147848	186	-	.	Parent=Osind01g06920.1
9311_chr01	StringTie	CDS	5147933	5148185	253	-	.	Parent=Osind01g06920.1
9311_chr01	StringTie	CDS	5148186	5148190	6	-	.	Parent=Osind01g06920.1
9311_chr11	StringTie	transcript	25442803	25482794	1000	-	.	Name=Osind11g17390.1;geneID=Osind11g17390
9311_chr11	StringTie	CDS	25442803	25443927	1000	-	.	Parent=Osind11g17390.1
9311_chr11	StringTie	CDS	25458742	25459434	1000	-	.	Parent=Osind11g17390.1
9311_chr11	StringTie	CDS	25482645	25482794	1000	-	.	Parent=Osind11g17390.1
9311_chr11	StringTie	transcript	27936845	27940390	1000	+	.	Name=Osind11g17970.1;geneID=Osind11g17970
9311_chr11	StringTie	CDS	27936845	27937515	1000	+	.	Parent=Osind11g17970.1
9311_chr11	StringTie	CDS	27937718	27938155	1000	+	.	Parent=Osind11g17970.1
9311_chr11	StringTie	CDS	27938350	27938428	1000	+	.	Parent=Osind11g17970.1
9311_chr11	StringTie	CDS	27939851	27940390	1000	+	.	Parent=Osind11g17970.1
9311_chr02	StringTie	transcript	1136409	1152494	1	+	.	Name=Osind02g01750.1;geneID=Osind02g01750
9311_chr02	StringTie	CDS	1136409	1136624	216	+	.	Parent=Osind02g01750.1
9311_chr02	StringTie	CDS	1151553	1151639	87	+	.	Parent=Osind02g01750.1
9311_chr02	StringTie	CDS	1151720	1151770	51	+	.	Parent=Osind02g01750.1
9311_chr02	StringTie	CDS	1151941	1152034	94	+	.	Parent=Osind02g01750.1
9311_chr02	StringTie	CDS	1152130	1152214	85	+	.	Parent=Osind02g01750.1
9311_chr02	StringTie	CDS	1152311	1152494	184	+	.	Parent=Osind02g01750.1
9311_chr04	StringTie	transcript	25858751	25860684	1	+	.	Name=Osind04g20860.1;geneID=Osind04g20860
9311_chr04	StringTie	CDS	25858751	25858821	71	+	.	Parent=Osind04g20860.1
9311_chr04	StringTie	CDS	25859219	25859304	86	+	.	Parent=Osind04g20860.1
9311_chr04	StringTie	CDS	25860590	25860684	95	+	.	Parent=Osind04g20860.1
9311_chr08	StringTie	transcript	9192021	9193195	1	+	.	Name=Osind08g08550.1;geneID=Osind08g08550
9311_chr08	StringTie	CDS	9250548	9250907	360	+	.	Parent=Osind08g08550.1
9311_chr08	StringTie	CDS	9251665	9251721	58	+	.	Parent=Osind08g08550.1
9311_chr09	StringTie	transcript	5883658	5888153	1	+	.	Name=Osind09g03780.1;geneID=Osind09g03780
9311_chr09	StringTie	CDS	5883658	5884063	406	+	.	Parent=Osind09g03780.1
9311_chr09	StringTie	CDS	5884763	5884889	127	+	.	Parent=Osind09g03780.1
9311_chr09	StringTie	CDS	5885046	5885152	107	+	.	Parent=Osind09g03780.1
9311_chr09	StringTie	CDS	5887875	5888153	279	+	.	Parent=Osind09g03780.1
9311_chr09	StringTie	transcript	21042734	21106343	1	+	.	Name=Osind09g19090.1;geneID=Osind09g19090
9311_chr09	StringTie	CDS	21042734	21042758	25	+	.	Parent=Osind09g19090.1
9311_chr09	StringTie	CDS	21044341	21044733	393	+	.	Parent=Osind09g19090.1
9311_chr09	StringTie	CDS	21105373	21105536	164	+	.	Parent=Osind09g19090.1
9311_chr09	StringTie	CDS	21105673	21105770	98	+	.	Parent=Osind09g19090.1
9311_chr09	StringTie	CDS	21105891	21105921	31	+	.	Parent=Osind09g19090.1
9311_chr09	StringTie	CDS	21106029	21106343	315	+	.	Parent=Osind09g19090.1
9311_chr06	StringTie	transcript	2413159	2434030	1	+	.	Name=Osind06g03270.1;geneID=Osind06g03270
9311_chr06	StringTie	CDS	2413161	2413679	521	+	.	Parent=Osind06g03270.1
9311_chr06	StringTie	CDS	2417399	2417613	215	+	.	Parent=Osind06g03270.1
9311_chr06	StringTie	CDS	2418072	2418782	711	+	.	Parent=Osind06g03270.1
9311_chr06	StringTie	CDS	2419970	2420728	759	+	.	Parent=Osind06g03270.1
9311_chr06	StringTie	CDS	2422199	2422881	683	+	.	Parent=Osind06g03270.1
9311_chr06	StringTie	CDS	2432498	2433233	736	+	.	Parent=Osind06g03270.1
9311_chr06	StringTie	CDS	2433302	2434030	729	+	.	Parent=Osind06g03270.1
9311_chr02	StringTie	transcript	36134589	36157550	1	-	.	Name=Osind02g42070.1;geneID=Osind02g42070
9311_chr02	StringTie	CDS	36134589	36134672	84	-	.	Parent=Osind02g42070.1
9311_chr02	StringTie	CDS	36134810	36134881	72	-	.	Parent=Osind02g42070.1
9311_chr02	StringTie	CDS	36135083	36135148	66	-	.	Parent=Osind02g42070.1
9311_chr02	StringTie	CDS	36135234	36135265	32	-	.	Parent=Osind02g42070.1
9311_chr02	StringTie	CDS	36135349	36135508	160	-	.	Parent=Osind02g42070.1
9311_chr02	StringTie	CDS	36135662	36135779	118	-	.	Parent=Osind02g42070.1
9311_chr02	StringTie	CDS	36135846	36135991	146	-	.	Parent=Osind02g42070.1
9311_chr02	StringTie	CDS	36136221	36136466	246	-	.	Parent=Osind02g42070.1
9311_chr02	StringTie	CDS	36136546	36136653	108	-	.	Parent=Osind02g42070.1
9311_chr02	StringTie	CDS	36136830	36136951	122	-	.	Parent=Osind02g42070.1
9311_chr02	StringTie	CDS	36137122	36137212	91	-	.	Parent=Osind02g42070.1
9311_chr02	StringTie	CDS	36137295	36137525	231	-	.	Parent=Osind02g42070.1
9311_chr02	StringTie	CDS	36137604	36137747	144	-	.	Parent=Osind02g42070.1
9311_chr02	StringTie	CDS	36138266	36138345	80	-	.	Parent=Osind02g42070.1
9311_chr02	StringTie	CDS	36138583	36138685	103	-	.	Parent=Osind02g42070.1
9311_chr02	StringTie	CDS	36156918	36157550	633	-	.	Parent=Osind02g42070.1
9311_chr03	StringTie	transcript	12543892	12556490	1	+	.	Name=Osind03g16990.1;geneID=Osind03g16990
9311_chr03	StringTie	CDS	12543892	12545362	1471	+	.	Parent=Osind03g16990.1
9311_chr03	StringTie	CDS	12545418	12545500	83	+	.	Parent=Osind03g16990.1
9311_chr03	StringTie	CDS	12546311	12548084	1774	+	.	Parent=Osind03g16990.1
9311_chr03	StringTie	CDS	12549284	12550112	829	+	.	Parent=Osind03g16990.1
9311_chr03	StringTie	CDS	12552666	12552762	97	+	.	Parent=Osind03g16990.1
9311_chr03	StringTie	CDS	12553008	12553286	279	+	.	Parent=Osind03g16990.1
9311_chr03	StringTie	CDS	12553489	12554028	540	+	.	Parent=Osind03g16990.1
9311_chr03	StringTie	CDS	12554274	12554384	111	+	.	Parent=Osind03g16990.1
9311_chr03	StringTie	CDS	12554517	12554657	141	+	.	Parent=Osind03g16990.1
9311_chr03	StringTie	CDS	12554724	12554828	105	+	.	Parent=Osind03g16990.1
9311_chr03	StringTie	CDS	12554914	12554991	78	+	.	Parent=Osind03g16990.1
9311_chr03	StringTie	CDS	12555780	12555906	127	+	.	Parent=Osind03g16990.1
9311_chr03	StringTie	CDS	12555977	12556059	83	+	.	Parent=Osind03g16990.1
9311_chr03	StringTie	CDS	12556341	12556490	150	+	.	Parent=Osind03g16990.1
Scaffold03_1105	StringTie	transcript	140	2793	.	-	.	Name=Osind03g18420.1;geneID=Osind03g18420
Scaffold03_1105	StringTie	CDS	140	2793	.	-	.	Parent=Osind03g18420.1
9311_chr07	GLEAN	mRNA	3850166	3861178	0.719143	-	.	Name=Os9311_07g034650.1;geneID=Os9311_07g034650
9311_chr07	GLEAN	CDS	3860830	3861178	.	-	0	ID=Os9311_07g034650.1:cds.1;Parent=Os9311_07g034650.1
9311_chr07	GLEAN	CDS	3860620	3860710	.	-	2	ID=Os9311_07g034650.1:cds.2;Parent=Os9311_07g034650.1
9311_chr07	GLEAN	CDS	3851350	3851463	.	-	1	ID=Os9311_07g034650.1:cds.3;Parent=Os9311_07g034650.1
9311_chr07	GLEAN	CDS	3850166	3850781	.	-	1	ID=Os9311_07g034650.1:cds.4;Parent=Os9311_07g034650.1
9311_chr08	GLEAN	mRNA	26892022	26896668	0.589664	+	.	Name=Os9311_08g118150.1;geneID=Os9311_08g118150
9311_chr08	GLEAN	CDS	26892022	26892968	.	+	0	ID=Os9311_08g118150.1:cds.1;Parent=Os9311_08g118150.1
9311_chr08	GLEAN	CDS	26895873	26896014	.	+	1	ID=Os9311_08g118150.1:cds.2;Parent=Os9311_08g118150.1
9311_chr08	GLEAN	CDS	26896108	26896668	.	+	0	ID=Os9311_08g118150.1:cds.3;Parent=Os9311_08g118150.1
9311_chr10	GLEAN	mRNA	3124836	3127111	0.749584	+	.	Name=Os9311_10g024650.1;geneID=Os9311_10g024650
9311_chr10	GLEAN	CDS	3124836	3125104	.	+	0	ID=Os9311_10g024650.1:cds.1;Parent=Os9311_10g024650.1
9311_chr10	GLEAN	CDS	3125181	3125391	.	+	1	ID=Os9311_10g024650.1:cds.2;Parent=Os9311_10g024650.1
9311_chr10	GLEAN	CDS	3125538	3125731	.	+	0	ID=Os9311_10g024650.1:cds.3;Parent=Os9311_10g024650.1
9311_chr10	GLEAN	CDS	3125954	3126031	.	+	1	ID=Os9311_10g024650.1:cds.4;Parent=Os9311_10g024650.1
9311_chr10	GLEAN	CDS	3126171	3126418	.	+	1	ID=Os9311_10g024650.1:cds.5;Parent=Os9311_10g024650.1
9311_chr10	GLEAN	CDS	3126558	3127111	.	+	2	ID=Os9311_10g024650.1:cds.6;Parent=Os9311_10g024650.1
9311_chr09	GLEAN	mRNA	13354310	13363066	0.751017	-	.	Name=Os9311_09g056250.1;geneID=Os9311_09g056250
9311_chr09	GLEAN	CDS	13362991	13363066	.	-	0	ID=Os9311_09g056250.1:cds.1;Parent=Os9311_09g056250.1
9311_chr09	GLEAN	CDS	13362284	13362486	.	-	2	ID=Os9311_09g056250.1:cds.2;Parent=Os9311_09g056250.1
9311_chr09	GLEAN	CDS	13361886	13362163	.	-	0	ID=Os9311_09g056250.1:cds.3;Parent=Os9311_09g056250.1
9311_chr09	GLEAN	CDS	13361695	13361779	.	-	1	ID=Os9311_09g056250.1:cds.4;Parent=Os9311_09g056250.1
9311_chr09	GLEAN	CDS	13361237	13361597	.	-	0	ID=Os9311_09g056250.1:cds.5;Parent=Os9311_09g056250.1
9311_chr09	GLEAN	CDS	13361070	13361127	.	-	2	ID=Os9311_09g056250.1:cds.6;Parent=Os9311_09g056250.1
9311_chr09	GLEAN	CDS	13359460	13359540	.	-	1	ID=Os9311_09g056250.1:cds.7;Parent=Os9311_09g056250.1
9311_chr09	GLEAN	CDS	13358099	13358298	.	-	1	ID=Os9311_09g056250.1:cds.8;Parent=Os9311_09g056250.1
9311_chr09	GLEAN	CDS	13357685	13357748	.	-	2	ID=Os9311_09g056250.1:cds.9;Parent=Os9311_09g056250.1
9311_chr09	GLEAN	CDS	13357394	13357502	.	-	1	ID=Os9311_09g056250.1:cds.10;Parent=Os9311_09g056250.1
9311_chr09	GLEAN	CDS	13356177	13356290	.	-	0	ID=Os9311_09g056250.1:cds.11;Parent=Os9311_09g056250.1
9311_chr09	GLEAN	CDS	13355982	13356074	.	-	0	ID=Os9311_09g056250.1:cds.12;Parent=Os9311_09g056250.1
9311_chr09	GLEAN	CDS	13355760	13355856	.	-	0	ID=Os9311_09g056250.1:cds.13;Parent=Os9311_09g056250.1
9311_chr09	GLEAN	CDS	13355604	13355668	.	-	2	ID=Os9311_09g056250.1:cds.14;Parent=Os9311_09g056250.1
9311_chr09	GLEAN	CDS	13355363	13355503	.	-	0	ID=Os9311_09g056250.1:cds.15;Parent=Os9311_09g056250.1
9311_chr09	GLEAN	CDS	13355124	13355237	.	-	0	ID=Os9311_09g056250.1:cds.16;Parent=Os9311_09g056250.1
9311_chr09	GLEAN	CDS	13354864	13354894	.	-	0	ID=Os9311_09g056250.1:cds.17;Parent=Os9311_09g056250.1
9311_chr09	GLEAN	CDS	13354310	13354641	.	-	2	ID=Os9311_09g056250.1:cds.18;Parent=Os9311_09g056250.1
9311_chr09	GLEAN	mRNA	22202526	22209417	0.999704	-	.	Name=Os9311_09g112550.1;geneID=Os9311_09g112550
9311_chr09	GLEAN	CDS	22209269	22209417	.	-	0	ID=Os9311_09g112550.1:cds.1;Parent=Os9311_09g112550.1
9311_chr09	GLEAN	CDS	22208135	22208303	.	-	1	ID=Os9311_09g112550.1:cds.2;Parent=Os9311_09g112550.1
9311_chr09	GLEAN	CDS	22207955	22208051	.	-	0	ID=Os9311_09g112550.1:cds.3;Parent=Os9311_09g112550.1
9311_chr09	GLEAN	CDS	22207759	22207885	.	-	2	ID=Os9311_09g112550.1:cds.4;Parent=Os9311_09g112550.1
9311_chr09	GLEAN	CDS	22207562	22207677	.	-	1	ID=Os9311_09g112550.1:cds.5;Parent=Os9311_09g112550.1
9311_chr09	GLEAN	CDS	22207088	22207182	.	-	2	ID=Os9311_09g112550.1:cds.6;Parent=Os9311_09g112550.1
9311_chr09	GLEAN	CDS	22206852	22207003	.	-	0	ID=Os9311_09g112550.1:cds.7;Parent=Os9311_09g112550.1
9311_chr09	GLEAN	CDS	22206427	22206484	.	-	1	ID=Os9311_09g112550.1:cds.8;Parent=Os9311_09g112550.1
9311_chr09	GLEAN	CDS	22206257	22206364	.	-	0	ID=Os9311_09g112550.1:cds.9;Parent=Os9311_09g112550.1
9311_chr09	GLEAN	CDS	22205632	22205884	.	-	0	ID=Os9311_09g112550.1:cds.10;Parent=Os9311_09g112550.1
9311_chr09	GLEAN	CDS	22205358	22205539	.	-	2	ID=Os9311_09g112550.1:cds.11;Parent=Os9311_09g112550.1
9311_chr09	GLEAN	CDS	22205080	22205175	.	-	0	ID=Os9311_09g112550.1:cds.12;Parent=Os9311_09g112550.1
9311_chr09	GLEAN	CDS	22204886	22204984	.	-	0	ID=Os9311_09g112550.1:cds.13;Parent=Os9311_09g112550.1
9311_chr09	GLEAN	CDS	22204470	22204601	.	-	0	ID=Os9311_09g112550.1:cds.14;Parent=Os9311_09g112550.1
9311_chr09	GLEAN	CDS	22204215	22204259	.	-	0	ID=Os9311_09g112550.1:cds.15;Parent=Os9311_09g112550.1
9311_chr09	GLEAN	CDS	22203340	22203496	.	-	0	ID=Os9311_09g112550.1:cds.16;Parent=Os9311_09g112550.1
9311_chr09	GLEAN	CDS	22202882	22202976	.	-	2	ID=Os9311_09g112550.1:cds.17;Parent=Os9311_09g112550.1
9311_chr09	GLEAN	CDS	22202526	22202669	.	-	0	ID=Os9311_09g112550.1:cds.18;Parent=Os9311_09g112550.1
1	StringTie	transcript	4646356	4654074	1000	+	.	ID=Oglab01g06260.1;Name=Oglab01g06260.1
1	StringTie	CDS	4646356	4646409	1000	+	.	Parent=Oglab01g06260.1
1	StringTie	CDS	4646464	4647648	1000	+	.	Parent=Oglab01g06260.1
1	StringTie	CDS	4652661	4652922	1000	+	.	Parent=Oglab01g06260.1
1	StringTie	CDS	4653035	4653402	1000	+	.	Parent=Oglab01g06260.1
1	StringTie	CDS	4653473	4653737	1000	+	.	Parent=Oglab01g06260.1
1	StringTie	CDS	4653821	4654074	1000	+	.	Parent=Oglab01g06260.1
1	maker	mRNA	30683995	30691633	1	-	.	ID=Oglab01g37540.3;Parent=Oglab01g37540;Name=Oglab01g37540.3;_AED=0.16;_eAED=0.16;_QI=0|0.8|0.63|0.90|0.7|0.72|11|0|1204
1	maker	CDS	30683995	30684093	99	-	.	ID=Oglab01g37540.3;Parent=Oglab01g37540.3
1	maker	CDS	30684411	30684550	140	-	.	ID=Oglab01g37540.3;Parent=Oglab01g37540.3
1	maker	CDS	30684824	30684899	76	-	.	ID=Oglab01g37540.3;Parent=Oglab01g37540.3
1	maker	CDS	30685198	30685244	47	-	.	ID=Oglab01g37540.3;Parent=Oglab01g37540.3
1	maker	CDS	30685422	30685539	118	-	.	ID=Oglab01g37540.3;Parent=Oglab01g37540.3
1	maker	CDS	30685991	30686041	51	-	.	ID=Oglab01g37540.3;Parent=Oglab01g37540.3
1	maker	CDS	30686454	30686521	68	-	.	ID=Oglab01g37540.3;Parent=Oglab01g37540.3
1	maker	CDS	30686616	30686696	81	-	.	ID=Oglab01g37540.3;Parent=Oglab01g37540.3
1	maker	CDS	30687489	30687693	205	-	.	ID=Oglab01g37540.3;Parent=Oglab01g37540.3
1	maker	CDS	30688297	30688477	181	-	.	ID=Oglab01g37540.3;Parent=Oglab01g37540.3
1	maker	CDS	30691066	30691205	140	-	.	ID=Oglab01g37540.3;Parent=Oglab01g37540.3
1	maker	CDS	30691247	30691321	75	-	.	ID=Oglab01g37540.3;Parent=Oglab01g37540.3
1	maker	CDS	30691478	30691633	156	-	.	ID=Oglab01g37540.3;Parent=Oglab01g37540.3
2	maker	mRNA	124030	135218	1	-	.	ID=Oglab02g00240.1;Parent=Oglab02g00240;Name=Oglab02g00240.1;_AED=0.16;_eAED=0.16;_QI=0|0.8|0.63|0.90|0.7|0.72|11|0|1204
2	maker	CDS	124030	124222	193	-	.	ID=Oglab02g00240.1;Parent=Oglab02g00240.1
2	maker	CDS	124333	124484	152	-	.	ID=Oglab02g00240.1;Parent=Oglab02g00240.1
2	maker	CDS	124584	125124	541	-	.	ID=Oglab02g00240.1;Parent=Oglab02g00240.1
2	maker	CDS	125425	125597	173	-	.	ID=Oglab02g00240.1;Parent=Oglab02g00240.1
2	maker	CDS	126101	126166	66	-	.	ID=Oglab02g00240.1;Parent=Oglab02g00240.1
2	maker	CDS	126285	126310	26	-	.	ID=Oglab02g00240.1;Parent=Oglab02g00240.1
2	maker	CDS	127875	127924	50	-	.	ID=Oglab02g00240.1;Parent=Oglab02g00240.1
2	maker	CDS	128283	128434	152	-	.	ID=Oglab02g00240.1;Parent=Oglab02g00240.1
2	maker	CDS	128952	129363	412	-	.	ID=Oglab02g00240.1;Parent=Oglab02g00240.1
2	maker	CDS	129796	129912	117	-	.	ID=Oglab02g00240.1;Parent=Oglab02g00240.1
2	maker	CDS	130047	130109	63	-	.	ID=Oglab02g00240.1;Parent=Oglab02g00240.1
2	maker	CDS	130750	130953	204	-	.	ID=Oglab02g00240.1;Parent=Oglab02g00240.1
2	maker	CDS	132391	132473	83	-	.	ID=Oglab02g00240.1;Parent=Oglab02g00240.1
2	maker	CDS	134284	134406	123	-	.	ID=Oglab02g00240.1;Parent=Oglab02g00240.1
2	maker	CDS	134877	135218	342	-	.	ID=Oglab02g00240.1;Parent=Oglab02g00240.1
2	maker	mRNA	9216970	9228647	1	-	.	ID=Oglab02g12130.1;Parent=Oglab02g12130;Name=Oglab02g12130.1;_AED=0.16;_eAED=0.16;_QI=0|0.8|0.63|0.90|0.7|0.72|11|0|1204
2	maker	CDS	9216969	9217084	115	-	.	ID=Oglab02g12130.1;Parent=Oglab02g12130.1
2	maker	CDS	9217420	9217651	232	-	.	ID=Oglab02g12130.1;Parent=Oglab02g12130.1
2	maker	CDS	9218649	9218768	120	-	.	ID=Oglab02g12130.1;Parent=Oglab02g12130.1
2	maker	CDS	9218848	9218994	147	-	.	ID=Oglab02g12130.1;Parent=Oglab02g12130.1
2	maker	CDS	9221600	9221749	150	-	.	ID=Oglab02g12130.1;Parent=Oglab02g12130.1
2	maker	CDS	9222054	9222170	117	-	.	ID=Oglab02g12130.1;Parent=Oglab02g12130.1
2	maker	CDS	9223012	9223116	105	-	.	ID=Oglab02g12130.1;Parent=Oglab02g12130.1
2	maker	CDS	9223886	9223983	98	-	.	ID=Oglab02g12130.1;Parent=Oglab02g12130.1
2	maker	CDS	9224430	9224599	170	-	.	ID=Oglab02g12130.1;Parent=Oglab02g12130.1
2	maker	CDS	9226029	9226081	53	-	.	ID=Oglab02g12130.1;Parent=Oglab02g12130.1
2	maker	CDS	9226764	9226843	80	-	.	ID=Oglab02g12130.1;Parent=Oglab02g12130.1
2	maker	CDS	9228035	9228279	245	-	.	ID=Oglab02g12130.1;Parent=Oglab02g12130.1
2	maker	CDS	9228451	9228647	197	-	.	ID=Oglab02g12130.1;Parent=Oglab02g12130.1
2	maker	mRNA	28226830	28235601	1	-	.	ID=Oglab02g34160.1;Parent=Oglab02g34160;Name=Oglab02g34160.1;_AED=0.16;_eAED=0.16;_QI=0|0.8|0.63|0.90|0.7|0.72|11|0|1204
2	maker	CDS	28226830	28227481	652	-	.	ID=Oglab02g34160.1;Parent=Oglab02g34160.1
2	maker	CDS	28227570	28227667	98	-	.	ID=Oglab02g34160.1;Parent=Oglab02g34160.1
2	maker	CDS	28230117	28230199	83	-	.	ID=Oglab02g34160.1;Parent=Oglab02g34160.1
2	maker	CDS	28230622	28230726	105	-	.	ID=Oglab02g34160.1;Parent=Oglab02g34160.1
2	maker	CDS	28230999	28231167	169	-	.	ID=Oglab02g34160.1;Parent=Oglab02g34160.1
2	maker	CDS	28231330	28231401	72	-	.	ID=Oglab02g34160.1;Parent=Oglab02g34160.1
2	maker	CDS	28231473	28231556	84	-	.	ID=Oglab02g34160.1;Parent=Oglab02g34160.1
2	maker	CDS	28231908	28232006	99	-	.	ID=Oglab02g34160.1;Parent=Oglab02g34160.1
2	maker	CDS	28232105	28232204	100	-	.	ID=Oglab02g34160.1;Parent=Oglab02g34160.1
2	maker	CDS	28232391	28232565	175	-	.	ID=Oglab02g34160.1;Parent=Oglab02g34160.1
2	maker	CDS	28232672	28232885	214	-	.	ID=Oglab02g34160.1;Parent=Oglab02g34160.1
2	maker	CDS	28233413	28233489	77	-	.	ID=Oglab02g34160.1;Parent=Oglab02g34160.1
2	maker	CDS	28233566	28233735	170	-	.	ID=Oglab02g34160.1;Parent=Oglab02g34160.1
2	maker	CDS	28234280	28234316	37	-	.	ID=Oglab02g34160.1;Parent=Oglab02g34160.1
2	maker	CDS	28234674	28234809	136	-	.	ID=Oglab02g34160.1;Parent=Oglab02g34160.1
2	maker	CDS	28235344	28235601	258	-	.	ID=Oglab02g34160.1;Parent=Oglab02g34160.1
2	StringTie	gene	28697503	28707791	.	+	.	ID=Oglab02g34920;Name=Oglab02g34920.2
2	StringTie	CDS	28697503	28698363	.	+	.	ID=exon1;Parent=Oglab02g34920.2
2	StringTie	CDS	28698444	28698568	.	+	.	ID=exon2;Parent=Oglab02g34920.2
2	StringTie	CDS	28700713	28701312	.	+	.	ID=exon3;Parent=Oglab02g34920.2
2	StringTie	CDS	28701412	28701703	.	+	.	ID=exon4;Parent=Oglab02g34920.2
2	StringTie	CDS	28702061	28702226	.	+	.	ID=exon5;Parent=Oglab02g34920.2
2	StringTie	CDS	28702526	28702628	.	+	.	ID=exon6;Parent=Oglab02g34920.2
2	StringTie	CDS	28702728	28702821	.	+	.	ID=exon7;Parent=Oglab02g34920.2
2	StringTie	CDS	28705192	28705487	.	+	.	ID=exon8;Parent=Oglab02g34920.2
2	StringTie	CDS	28705580	28705781	.	+	.	ID=exon9;Parent=Oglab02g34920.2
2	StringTie	CDS	28707492	28707791	.	+	.	ID=exon10;Parent=Oglab02g34920.2
3	StringTie	gene	3394215	3398852	1000	-	.	ID=Oglab03g05040;Name=Oglab03g05040.1
3	StringTie	CDS	3394215	3394997	1000	-	.	ID=exon1;Parent=Oglab03g05040.1
3	StringTie	CDS	3395114	3395410	1000	-	.	ID=exon2;Parent=Oglab03g05040.1
3	StringTie	CDS	3395502	3395717	1000	-	.	ID=exon3;Parent=Oglab03g05040.1
3	StringTie	CDS	3395806	3396156	1000	-	.	ID=exon4;Parent=Oglab03g05040.1
3	StringTie	CDS	3397344	3398852	1000	-	.	ID=exon5;Parent=Oglab03g05040.1
3	maker	mRNA	8068270	8077932	1	-	.	ID=Oglab03g11620.1;Parent=Oglab03g11620;Name=Oglab03g11620.1;_AED=0.16;_eAED=0.16;_QI=0|0.8|0.63|0.90|0.7|0.72|11|0|1204
3	maker	CDS	8068270	8069835	1566	-	.	ID=Oglab03g11620.1;Parent=Oglab03g11620.1
3	maker	CDS	8070305	8070337	33	-	.	ID=Oglab03g11620.1;Parent=Oglab03g11620.1
3	maker	CDS	8070823	8070928	106	-	.	ID=Oglab03g11620.1;Parent=Oglab03g11620.1
3	maker	CDS	8071031	8071260	230	-	.	ID=Oglab03g11620.1;Parent=Oglab03g11620.1
3	maker	CDS	8071941	8072000	60	-	.	ID=Oglab03g11620.1;Parent=Oglab03g11620.1
3	maker	CDS	8072077	8072268	192	-	.	ID=Oglab03g11620.1;Parent=Oglab03g11620.1
3	maker	CDS	8072639	8072792	154	-	.	ID=Oglab03g11620.1;Parent=Oglab03g11620.1
3	maker	CDS	8072861	8072940	80	-	.	ID=Oglab03g11620.1;Parent=Oglab03g11620.1
3	maker	CDS	8073211	8073292	82	-	.	ID=Oglab03g11620.1;Parent=Oglab03g11620.1
3	maker	CDS	8073369	8073466	98	-	.	ID=Oglab03g11620.1;Parent=Oglab03g11620.1
3	maker	CDS	8073671	8073739	69	-	.	ID=Oglab03g11620.1;Parent=Oglab03g11620.1
3	maker	CDS	8073818	8073916	99	-	.	ID=Oglab03g11620.1;Parent=Oglab03g11620.1
3	maker	CDS	8074473	8074529	57	-	.	ID=Oglab03g11620.1;Parent=Oglab03g11620.1
3	maker	CDS	8074666	8074831	166	-	.	ID=Oglab03g11620.1;Parent=Oglab03g11620.1
3	maker	CDS	8074944	8074988	45	-	.	ID=Oglab03g11620.1;Parent=Oglab03g11620.1
3	maker	CDS	8075078	8075139	62	-	.	ID=Oglab03g11620.1;Parent=Oglab03g11620.1
3	maker	CDS	8075217	8075324	108	-	.	ID=Oglab03g11620.1;Parent=Oglab03g11620.1
3	maker	CDS	8075511	8075561	51	-	.	ID=Oglab03g11620.1;Parent=Oglab03g11620.1
3	maker	CDS	8075635	8075736	102	-	.	ID=Oglab03g11620.1;Parent=Oglab03g11620.1
3	maker	CDS	8076154	8076240	87	-	.	ID=Oglab03g11620.1;Parent=Oglab03g11620.1
3	maker	CDS	8076352	8076615	264	-	.	ID=Oglab03g11620.1;Parent=Oglab03g11620.1
3	maker	CDS	8076769	8076906	138	-	.	ID=Oglab03g11620.1;Parent=Oglab03g11620.1
3	maker	CDS	8077131	8077192	62	-	.	ID=Oglab03g11620.1;Parent=Oglab03g11620.1
3	maker	CDS	8077311	8077643	333	-	.	ID=Oglab03g11620.1;Parent=Oglab03g11620.1
3	maker	CDS	8077737	8077932	196	-	.	ID=Oglab03g11620.1;Parent=Oglab03g11620.1
3	maker	mRNA	26474487	26484002	1	-	.	ID=Oglab03g30700.1;Parent=Oglab03g30700;Name=Oglab03g30700.1;_AED=0.16;_eAED=0.16;_QI=0|0.8|0.63|0.90|0.7|0.72|11|0|1204
3	maker	CDS	26474102	26474122	21	-	.	ID=Oglab03g30700.1;Parent=Oglab03g30700.1
3	maker	CDS	26474487	26474507	21	-	.	ID=Oglab03g30700.1;Parent=Oglab03g30700.1
3	maker	CDS	26474759	26475206	448	-	.	ID=Oglab03g30700.1;Parent=Oglab03g30700.1
3	maker	CDS	26475309	26476153	845	-	.	ID=Oglab03g30700.1;Parent=Oglab03g30700.1
3	maker	CDS	26476244	26476855	612	-	.	ID=Oglab03g30700.1;Parent=Oglab03g30700.1
3	maker	CDS	26477018	26477269	252	-	.	ID=Oglab03g30700.1;Parent=Oglab03g30700.1
3	maker	CDS	26477960	26478090	131	-	.	ID=Oglab03g30700.1;Parent=Oglab03g30700.1
3	maker	CDS	26478215	26478293	79	-	.	ID=Oglab03g30700.1;Parent=Oglab03g30700.1
3	maker	CDS	26478371	26478486	116	-	.	ID=Oglab03g30700.1;Parent=Oglab03g30700.1
3	maker	CDS	26478909	26478975	67	-	.	ID=Oglab03g30700.1;Parent=Oglab03g30700.1
3	maker	CDS	26479681	26479776	96	-	.	ID=Oglab03g30700.1;Parent=Oglab03g30700.1
3	maker	CDS	26480995	26481104	110	-	.	ID=Oglab03g30700.1;Parent=Oglab03g30700.1
3	maker	CDS	26481249	26481336	88	-	.	ID=Oglab03g30700.1;Parent=Oglab03g30700.1
3	maker	CDS	26482375	26482449	75	-	.	ID=Oglab03g30700.1;Parent=Oglab03g30700.1
3	maker	CDS	26482641	26482685	45	-	.	ID=Oglab03g30700.1;Parent=Oglab03g30700.1
3	maker	CDS	26482760	26482834	75	-	.	ID=Oglab03g30700.1;Parent=Oglab03g30700.1
3	maker	CDS	26483631	26484002	372	-	.	ID=Oglab03g30700.1;Parent=Oglab03g30700.1
3	StringTie	transcript	30069099	30081023	1000	+	.	Name=Oglab03g35760.1;geneID=Oglab03g35760
3	StringTie	CDS	30069099	30069848	1000	+	.	Parent=Oglab03g35760.1
3	StringTie	CDS	30070236	30070524	1000	+	.	Parent=Oglab03g35760.1
3	StringTie	CDS	30074903	30074940	1000	+	.	Parent=Oglab03g35760.1
3	StringTie	CDS	30075590	30076564	1000	+	.	Parent=Oglab03g35760.1
3	StringTie	CDS	30080916	30081023	1000	+	.	Parent=Oglab03g35760.1
3	maker	mRNA	31865468	31873089	1	+	.	ID=Oglab03g38510.1;Parent=Oglab03g38510;Name=Oglab03g38510.1;_AED=0.16;_eAED=0.16;_QI=0|0.8|0.63|0.90|0.7|0.72|11|0|1204
3	maker	CDS	31865468	31865534	67	+	.	ID=Oglab03g38510.1;Parent=Oglab03g38510.1
3	maker	CDS	31867770	31867896	127	+	.	ID=Oglab03g38510.1;Parent=Oglab03g38510.1
3	maker	CDS	31868000	31868066	67	+	.	ID=Oglab03g38510.1;Parent=Oglab03g38510.1
3	maker	CDS	31868227	31868416	190	+	.	ID=Oglab03g38510.1;Parent=Oglab03g38510.1
3	maker	CDS	31868561	31868745	185	+	.	ID=Oglab03g38510.1;Parent=Oglab03g38510.1
3	maker	CDS	31870634	31871137	504	+	.	ID=Oglab03g38510.1;Parent=Oglab03g38510.1
3	maker	CDS	31872280	31872499	220	+	.	ID=Oglab03g38510.1;Parent=Oglab03g38510.1
3	maker	CDS	31872596	31873089	494	+	.	ID=Oglab03g38510.1;Parent=Oglab03g38510.1
3	maker	mRNA	32832927	32840570	1	-	.	ID=Oglab03g39920.1;Parent=Oglab03g39920;Name=Oglab03g39920.1;_AED=0.16;_eAED=0.16;_QI=0|0.8|0.63|0.90|0.7|0.72|11|0|1204
3	maker	CDS	32831486	32831500	15	-	.	ID=Oglab03g39920.1;Parent=Oglab03g39920.1
3	maker	CDS	32832927	32832989	63	-	.	ID=Oglab03g39920.1;Parent=Oglab03g39920.1
3	maker	CDS	32833112	32833216	105	-	.	ID=Oglab03g39920.1;Parent=Oglab03g39920.1
3	maker	CDS	32833617	32833667	51	-	.	ID=Oglab03g39920.1;Parent=Oglab03g39920.1
3	maker	CDS	32833805	32833906	102	-	.	ID=Oglab03g39920.1;Parent=Oglab03g39920.1
3	maker	CDS	32834720	32834952	233	-	.	ID=Oglab03g39920.1;Parent=Oglab03g39920.1
3	maker	CDS	32835398	32835589	192	-	.	ID=Oglab03g39920.1;Parent=Oglab03g39920.1
3	maker	CDS	32836442	32836622	181	-	.	ID=Oglab03g39920.1;Parent=Oglab03g39920.1
3	maker	CDS	32836765	32836964	200	-	.	ID=Oglab03g39920.1;Parent=Oglab03g39920.1
3	maker	CDS	32837830	32838217	388	-	.	ID=Oglab03g39920.1;Parent=Oglab03g39920.1
3	maker	CDS	32838486	32840570	2085	-	.	ID=Oglab03g39920.1;Parent=Oglab03g39920.1
4	StringTie	transcript	4600032	4601453	1000	-	.	Name=Oglab04g03860.1;geneID=Oglab04g03860
4	StringTie	CDS	4600032	4600113	1000	-	.	Parent=Oglab04g03860.1
4	StringTie	CDS	4600194	4600334	1000	-	.	Parent=Oglab04g03860.1
4	StringTie	CDS	4600857	4601079	1000	-	.	Parent=Oglab04g03860.1
4	StringTie	CDS	4601173	4601453	1000	-	.	Parent=Oglab04g03860.1
4	StringTie	transcript	25209498	25228183	1000	-	.	Name=Oglab04g27220.1;geneID=Oglab04g27220
4	StringTie	CDS	25209498	25211158	1000	-	.	Parent=Oglab04g27220.1
4	StringTie	CDS	25211212	25212162	1000	-	.	Parent=Oglab04g27220.1
4	StringTie	CDS	25224176	25224314	1000	-	.	Parent=Oglab04g27220.1
4	StringTie	CDS	25224366	25224604	1000	-	.	Parent=Oglab04g27220.1
4	StringTie	CDS	25224750	25225680	1000	-	.	Parent=Oglab04g27220.1
4	StringTie	CDS	25226228	25226323	1000	-	.	Parent=Oglab04g27220.1
4	StringTie	CDS	25226427	25226555	1000	-	.	Parent=Oglab04g27220.1
4	StringTie	CDS	25226744	25226823	1000	-	.	Parent=Oglab04g27220.1
4	StringTie	CDS	25226911	25227152	1000	-	.	Parent=Oglab04g27220.1
4	StringTie	CDS	25227234	25228183	1000	-	.	Parent=Oglab04g27220.1
5	maker	gene	3426641	3437917	1	-	.	ID=Oglab05g04450.2;Parent=Oglab05g04450;Name=Oglab05g04450.2;_AED=0.16;_eAED=0.16;_QI=0|0.8|0.63|0.90|0.7|0.72|11|0|1204
5	maker	CDS	3426641	3427798	1158	-	.	ID=Oglab05g04450.2;Parent=Oglab05g04450.2
5	maker	CDS	3434207	3434238	32	-	.	ID=Oglab05g04450.2;Parent=Oglab05g04450.2
5	maker	CDS	3434325	3434409	85	-	.	ID=Oglab05g04450.2;Parent=Oglab05g04450.2
5	maker	CDS	3434464	3434469	6	-	.	ID=Oglab05g04450.2;Parent=Oglab05g04450.2
5	maker	CDS	3434788	3435469	682	-	.	ID=Oglab05g04450.2;Parent=Oglab05g04450.2
5	maker	CDS	3435829	3436052	224	-	.	ID=Oglab05g04450.2;Parent=Oglab05g04450.2
5	maker	CDS	3436473	3436690	218	-	.	ID=Oglab05g04450.2;Parent=Oglab05g04450.2
5	maker	CDS	3436773	3436853	81	-	.	ID=Oglab05g04450.2;Parent=Oglab05g04450.2
5	maker	CDS	3436960	3437917	958	-	.	ID=Oglab05g04450.2;Parent=Oglab05g04450.2
5	StringTie	transcript	5930783	5935120	1000	-	.	Name=Oglab05g07040.1;geneID=Oglab05g07040
5	StringTie	CDS	5930783	5931019	1000	-	.	Parent=Oglab05g07040.1
5	StringTie	CDS	5934557	5935120	1000	-	.	Parent=Oglab05g07040.1
5	StringTie	transcript	14285588	14291351	1000	+	.	Name=Oglab05g14020.2;geneID=Oglab05g14020
5	StringTie	CDS	14285588	14286058	1000	+	.	Parent=Oglab05g14020.2
5	StringTie	CDS	14286154	14286315	1000	+	.	Parent=Oglab05g14020.2
5	StringTie	CDS	14286390	14286605	1000	+	.	Parent=Oglab05g14020.2
5	StringTie	CDS	14287847	14288045	1000	+	.	Parent=Oglab05g14020.2
5	StringTie	CDS	14289145	14289180	1000	+	.	Parent=Oglab05g14020.2
5	StringTie	CDS	14289422	14289578	1000	+	.	Parent=Oglab05g14020.2
5	StringTie	CDS	14289921	14289993	1000	+	.	Parent=Oglab05g14020.2
5	StringTie	CDS	14291091	14291351	1000	+	.	Parent=Oglab05g14020.2
5	StringTie	transcript	19233154	19236371	1000	-	.	Name=Oglab05g20580.1;geneID=Oglab05g20580
5	StringTie	CDS	19233154	19234207	1000	-	.	Parent=Oglab05g20580.1
5	StringTie	CDS	19235309	19235361	1000	-	.	Parent=Oglab05g20580.1
5	StringTie	CDS	19236081	19236371	1000	-	.	Parent=Oglab05g20580.1
6	maker	gene	20264164	20270604	1	+	.	ID=Oglab06g21340.1;Name=Oglab06g21340.1;_AED=0.16;_eAED=0.16;_QI=0|0.8|0.63|0.90|0.7|0.72|11|0|1204
6	maker	CDS	20264164	20264173	282	+	.	ID=exon1;Parent=Oglab06g21340.1
6	maker	CDS	20264799	20264848	50	+	.	ID=exon2;Parent=Oglab06g21340.1
6	maker	CDS	20264997	20265109	113	+	.	ID=exon3;Parent=Oglab06g21340.1
6	maker	CDS	20265217	20265496	280	+	.	ID=exon4;Parent=Oglab06g21340.1
6	maker	CDS	20266046	20266175	130	+	.	ID=exon5;Parent=Oglab06g21340.1
6	maker	CDS	20266339	20266514	176	+	.	ID=exon6;Parent=Oglab06g21340.1
6	maker	CDS	20266619	20266715	97	+	.	ID=exon7;Parent=Oglab06g21340.1
6	maker	CDS	20266807	20266876	70	+	.	ID=exon8;Parent=Oglab06g21340.1
6	maker	CDS	20267641	20267923	283	+	.	ID=exon9;Parent=Oglab06g21340.1
6	maker	CDS	20268289	20268332	44	+	.	ID=exon10;Parent=Oglab06g21340.1
6	maker	CDS	20269501	20269612	112	+	.	ID=exon11;Parent=Oglab06g21340.1
6	maker	CDS	20269701	20269811	111	+	.	ID=exon12;Parent=Oglab06g21340.1
6	maker	CDS	20270323	20270604	282	+	.	ID=exon13;Parent=Oglab06g21340.1
6	StringTie	transcript	22316399	22322408	1000	-	.	Name=Oglab06g24190.1;geneID=Oglab06g24190
6	StringTie	CDS	22316399	22316434	1000	-	.	Parent=Oglab06g24190.1
6	StringTie	CDS	22317172	22317255	1000	-	.	Parent=Oglab06g24190.1
6	StringTie	CDS	22317357	22317824	1000	-	.	Parent=Oglab06g24190.1
6	StringTie	CDS	22318180	22318362	1000	-	.	Parent=Oglab06g24190.1
6	StringTie	CDS	22318808	22318913	1000	-	.	Parent=Oglab06g24190.1
6	StringTie	CDS	22319387	22319440	1000	-	.	Parent=Oglab06g24190.1
6	StringTie	CDS	22319551	22319880	1000	-	.	Parent=Oglab06g24190.1
6	StringTie	CDS	22320645	22322408	1000	-	.	Parent=Oglab06g24190.1
6	StringTie	transcript	23395113	23413046	1000	+	.	Name=Oglab06g25720.1;geneID=Oglab06g25720
6	StringTie	CDS	23395113	23397887	1000	+	.	Parent=Oglab06g25720.1
6	StringTie	CDS	23404279	23404503	1000	+	.	Parent=Oglab06g25720.1
6	StringTie	CDS	23404906	23405285	1000	+	.	Parent=Oglab06g25720.1
6	StringTie	CDS	23405414	23405549	1000	+	.	Parent=Oglab06g25720.1
6	StringTie	CDS	23406180	23406202	1000	+	.	Parent=Oglab06g25720.1
6	StringTie	CDS	23411698	23412646	1000	+	.	Parent=Oglab06g25720.1
6	StringTie	CDS	23413008	23413046	1000	+	.	Parent=Oglab06g25720.1
6	StringTie	transcript	24043624	24049863	1000	+	.	Name=Oglab06g26450.1;geneID=Oglab06g26450
6	StringTie	CDS	24043624	24043890	1000	+	.	Parent=Oglab06g26450.1
6	StringTie	CDS	24048117	24048142	1000	+	.	Parent=Oglab06g26450.1
6	StringTie	CDS	24049455	24049565	1000	+	.	Parent=Oglab06g26450.1
6	StringTie	CDS	24049668	24049863	1000	+	.	Parent=Oglab06g26450.1
7	StringTie	transcript	2503023	2506853	1000	+	.	Name=Oglab07g03220.1;geneID=Oglab07g03220
7	StringTie	CDS	2503023	2503155	1000	+	.	Parent=Oglab07g03220.1
7	StringTie	CDS	2503651	2503721	1000	+	.	Parent=Oglab07g03220.1
7	StringTie	CDS	2503829	2504092	1000	+	.	Parent=Oglab07g03220.1
7	StringTie	CDS	2505302	2505551	1000	+	.	Parent=Oglab07g03220.1
7	StringTie	CDS	2505626	2505778	1000	+	.	Parent=Oglab07g03220.1
7	StringTie	CDS	2505863	2505968	1000	+	.	Parent=Oglab07g03220.1
7	StringTie	CDS	2506051	2506165	1000	+	.	Parent=Oglab07g03220.1
7	StringTie	CDS	2506818	2506853	1000	+	.	Parent=Oglab07g03220.1
7	StringTie	transcript	19137799	19147591	1000	-	.	Name=Oglab07g20540.2;geneID=Oglab07g20540
7	StringTie	CDS	19137799	19138098	1000	-	.	Parent=Oglab07g20540.2
7	StringTie	CDS	19138239	19138546	1000	-	.	Parent=Oglab07g20540.2
7	StringTie	CDS	19138584	19139062	1000	-	.	Parent=Oglab07g20540.2
7	StringTie	CDS	19139188	19139339	1000	-	.	Parent=Oglab07g20540.2
7	StringTie	CDS	19139439	19139597	1000	-	.	Parent=Oglab07g20540.2
7	StringTie	CDS	19139686	19139932	1000	-	.	Parent=Oglab07g20540.2
7	StringTie	CDS	19140021	19140137	1000	-	.	Parent=Oglab07g20540.2
7	StringTie	CDS	19140844	19141175	1000	-	.	Parent=Oglab07g20540.2
7	StringTie	CDS	19143248	19143263	1000	-	.	Parent=Oglab07g20540.2
7	StringTie	CDS	19147353	19147591	1000	-	.	Parent=Oglab07g20540.2
8	StringTie	transcript	1240228	1248083	1000	+	.	Name=Oglab08g01630.1;geneID=Oglab08g01630
8	StringTie	CDS	1240228	1240586	1000	+	.	Parent=Oglab08g01630.1
8	StringTie	CDS	1243857	1243902	1000	+	.	Parent=Oglab08g01630.1
8	StringTie	CDS	1244939	1245074	1000	+	.	Parent=Oglab08g01630.1
8	StringTie	CDS	1246368	1246446	1000	+	.	Parent=Oglab08g01630.1
8	StringTie	CDS	1246755	1246876	1000	+	.	Parent=Oglab08g01630.1
8	StringTie	CDS	1246996	1247057	1000	+	.	Parent=Oglab08g01630.1
8	StringTie	CDS	1248060	1248083	1000	+	.	Parent=Oglab08g01630.1
8	maker	mRNA	3658399	3663184	1	-	.	ID=Oglab08g04500.1;Parent=Oglab08g04500;Name=Oglab08g04500.1;_AED=0.16;_eAED=0.16;_QI=0|0.8|0.63|0.90|0.7|0.72|11|0|1204
8	maker	CDS	3658399	3658546	149	-	.	ID=Oglab08g04500.1;Parent=Oglab08g04500.1
8	maker	CDS	3658561	3658635	75	-	.	ID=Oglab08g04500.1;Parent=Oglab08g04500.1
8	maker	CDS	3660056	3660078	23	-	.	ID=Oglab08g04500.1;Parent=Oglab08g04500.1
8	maker	CDS	3660718	3660752	35	-	.	ID=Oglab08g04500.1;Parent=Oglab08g04500.1
8	maker	CDS	3662793	3663184	392	-	.	ID=Oglab08g04500.1;Parent=Oglab08g04500.1
8	StringTie	transcript	11309696	11310559	1000	+	.	Name=Oglab08g10710.1;geneID=Oglab08g10710
8	StringTie	CDS	11309696	11309710	1000	+	.	Parent=Oglab08g10710.1
8	StringTie	CDS	11309854	11310094	1000	+	.	Parent=Oglab08g10710.1
8	StringTie	CDS	11310306	11310559	1000	+	.	Parent=Oglab08g10710.1
8	maker	mRNA	14224347	14234184	1	+	.	ID=Oglab08g13140.1;Parent=Oglab08g13140;Name=Oglab08g13140.1;_AED=0.16;_eAED=0.16;_QI=0|0.8|0.63|0.90|0.7|0.72|11|0|1204
8	maker	CDS	14224347	14225368	1022	+	.	ID=Oglab08g13140.1;Parent=Oglab08g13140.1
8	maker	CDS	14225390	14225413	24	+	.	ID=Oglab08g13140.1;Parent=Oglab08g13140.1
8	maker	CDS	14225432	14225728	297	+	.	ID=Oglab08g13140.1;Parent=Oglab08g13140.1
8	maker	CDS	14225784	14226033	250	+	.	ID=Oglab08g13140.1;Parent=Oglab08g13140.1
8	maker	CDS	14226044	14226141	98	+	.	ID=Oglab08g13140.1;Parent=Oglab08g13140.1
8	maker	CDS	14233380	14234184	805	+	.	ID=Oglab08g13140.1;Parent=Oglab08g13140.1
8	maker	mRNA	16387809	16388253	1	-	.	ID=Oglab08g15520.1;Parent=Oglab08g15520;Name=Oglab08g15520.1;_AED=0.16;_eAED=0.16;_QI=0|0.8|0.63|0.90|0.7|0.72|11|0|1204
8	maker	CDS	16387810	16388253	444	-	.	ID=Oglab08g15520.1;Parent=Oglab08g15520.1
9	maker	mRNA	14889047	14898760	1	-	.	ID=Oglab09g14970.1;Parent=Oglab09g14970;Name=Oglab09g14970.1;_AED=0.16;_eAED=0.16;_QI=0|0.8|0.63|0.90|0.7|0.72|11|0|1204
9	maker	CDS	14889047	14889092	46	-	.	ID=Oglab09g14970.1;Parent=Oglab09g14970.1
9	maker	CDS	14889450	14889499	50	-	.	ID=Oglab09g14970.1;Parent=Oglab09g14970.1
9	maker	CDS	14889822	14889920	99	-	.	ID=Oglab09g14970.1;Parent=Oglab09g14970.1
9	maker	CDS	14889969	14890076	108	-	.	ID=Oglab09g14970.1;Parent=Oglab09g14970.1
9	maker	CDS	14890675	14890775	101	-	.	ID=Oglab09g14970.1;Parent=Oglab09g14970.1
9	maker	CDS	14891217	14891340	124	-	.	ID=Oglab09g14970.1;Parent=Oglab09g14970.1
9	maker	CDS	14891699	14891902	204	-	.	ID=Oglab09g14970.1;Parent=Oglab09g14970.1
9	maker	CDS	14892687	14892872	186	-	.	ID=Oglab09g14970.1;Parent=Oglab09g14970.1
9	maker	CDS	14894448	14894463	16	-	.	ID=Oglab09g14970.1;Parent=Oglab09g14970.1
9	maker	CDS	14894651	14895580	930	-	.	ID=Oglab09g14970.1;Parent=Oglab09g14970.1
9	maker	CDS	14896827	14896918	92	-	.	ID=Oglab09g14970.1;Parent=Oglab09g14970.1
9	maker	CDS	14897253	14897522	270	-	.	ID=Oglab09g14970.1;Parent=Oglab09g14970.1
9	maker	CDS	14897777	14897895	119	-	.	ID=Oglab09g14970.1;Parent=Oglab09g14970.1
9	maker	CDS	14897929	14898760	832	-	.	ID=Oglab09g14970.1;Parent=Oglab09g14970.1
9	maker	mRNA	16764638	16770702	1	+	.	ID=Oglab09g17780.2;Parent=Oglab09g17780;Name=Oglab09g17780.2;_AED=0.16;_eAED=0.16;_QI=0|0.8|0.63|0.90|0.7|0.72|11|0|1204
9	maker	CDS	16764638	16764725	88	+	.	ID=Oglab09g17780.2;Parent=Oglab09g17780.2
9	maker	CDS	16765035	16765093	59	+	.	ID=Oglab09g17780.2;Parent=Oglab09g17780.2
9	maker	CDS	16765207	16765281	75	+	.	ID=Oglab09g17780.2;Parent=Oglab09g17780.2
9	maker	CDS	16765370	16765486	117	+	.	ID=Oglab09g17780.2;Parent=Oglab09g17780.2
9	maker	CDS	16765577	16765647	71	+	.	ID=Oglab09g17780.2;Parent=Oglab09g17780.2
9	maker	CDS	16765736	16766039	304	+	.	ID=Oglab09g17780.2;Parent=Oglab09g17780.2
9	maker	CDS	16766287	16766576	290	+	.	ID=Oglab09g17780.2;Parent=Oglab09g17780.2
9	maker	CDS	16766731	16766773	43	+	.	ID=Oglab09g17780.2;Parent=Oglab09g17780.2
9	maker	CDS	16767520	16767706	187	+	.	ID=Oglab09g17780.2;Parent=Oglab09g17780.2
9	maker	CDS	16767809	16767958	150	+	.	ID=Oglab09g17780.2;Parent=Oglab09g17780.2
9	maker	CDS	16768346	16768522	177	+	.	ID=Oglab09g17780.2;Parent=Oglab09g17780.2
9	maker	CDS	16768644	16768732	89	+	.	ID=Oglab09g17780.2;Parent=Oglab09g17780.2
9	maker	CDS	16768830	16768894	65	+	.	ID=Oglab09g17780.2;Parent=Oglab09g17780.2
9	maker	CDS	16769016	16769118	103	+	.	ID=Oglab09g17780.2;Parent=Oglab09g17780.2
9	maker	CDS	16769613	16769723	111	+	.	ID=Oglab09g17780.2;Parent=Oglab09g17780.2
9	maker	CDS	16769877	16769957	81	+	.	ID=Oglab09g17780.2;Parent=Oglab09g17780.2
9	maker	CDS	16770673	16770702	30	+	.	ID=Oglab09g17780.2;Parent=Oglab09g17780.2
9	maker	mRNA	17527748	17531664	1	-	.	ID=Oglab09g18980.1;Parent=Oglab09g18980;Name=Oglab09g18980.1;_AED=0.16;_eAED=0.16;_QI=0|0.8|0.63|0.90|0.7|0.72|11|0|1204
9	maker	CDS	17527748	17529200	1453	-	.	ID=Oglab09g18980.1;Parent=Oglab09g18980.1
9	maker	CDS	17529241	17529323	83	-	.	ID=Oglab09g18980.1;Parent=Oglab09g18980.1
9	maker	CDS	17529846	17529950	105	-	.	ID=Oglab09g18980.1;Parent=Oglab09g18980.1
9	maker	CDS	17530067	17530274	208	-	.	ID=Oglab09g18980.1;Parent=Oglab09g18980.1
9	maker	CDS	17530539	17530684	146	-	.	ID=Oglab09g18980.1;Parent=Oglab09g18980.1
9	maker	CDS	17531004	17531212	209	-	.	ID=Oglab09g18980.1;Parent=Oglab09g18980.1
9	maker	CDS	17531445	17531664	220	-	.	ID=Oglab09g18980.1;Parent=Oglab09g18980.1
10	StringTie	transcript	4470950	4474722	1000	-	.	Name=Oglab10g03910.1;geneID=Oglab10g03910
10	StringTie	CDS	4470950	4471054	1000	-	.	Parent=Oglab10g03910.1
10	StringTie	CDS	4471217	4471310	1000	-	.	Parent=Oglab10g03910.1
10	StringTie	CDS	4474628	4474722	1000	-	.	Parent=Oglab10g03910.1
10	StringTie	transcript	15613576	15614208	1000	+	.	Name=Oglab10g14420.1;geneID=Oglab10g14420
10	StringTie	CDS	15613576	15613842	1000	+	.	Parent=Oglab10g14420.1
10	StringTie	CDS	15614017	15614208	1000	+	.	Parent=Oglab10g14420.1
11	StringTie	transcript	5228418	5228837	1000	-	.	Name=Oglab11g06530.1;geneID=Oglab11g06530
11	StringTie	CDS	5228418	5228465	1000	-	.	Parent=Oglab11g06530.1
11	StringTie	CDS	5228574	5228837	1000	-	.	Parent=Oglab11g06530.1
11	StringTie	transcript	18787837	18795365	1000	-	.	Name=Oglab11g18520.1;geneID=Oglab11g18520
11	StringTie	CDS	18787837	18789181	1000	-	.	Parent=Oglab11g18520.1
11	StringTie	CDS	18793405	18793508	1000	-	.	Parent=Oglab11g18520.1
11	StringTie	CDS	18793917	18795365	1000	-	.	Parent=Oglab11g18520.1
11	StringTie	transcript	20243638	20251867	1000	-	.	Name=Oglab11g20100.2;geneID=Oglab11g20100
11	StringTie	CDS	20243638	20243841	1000	-	.	Parent=Oglab11g20100.2
11	StringTie	CDS	20244281	20245018	1000	-	.	Parent=Oglab11g20100.2
11	StringTie	CDS	20245413	20245637	1000	-	.	Parent=Oglab11g20100.2
11	StringTie	CDS	20246384	20246402	1000	-	.	Parent=Oglab11g20100.2
11	StringTie	CDS	20246427	20246488	1000	-	.	Parent=Oglab11g20100.2
11	StringTie	CDS	20247218	20247313	1000	-	.	Parent=Oglab11g20100.2
11	StringTie	CDS	20247484	20247524	1000	-	.	Parent=Oglab11g20100.2
11	StringTie	CDS	20247665	20247981	1000	-	.	Parent=Oglab11g20100.2
11	StringTie	CDS	20248814	20249964	1000	-	.	Parent=Oglab11g20100.2
11	StringTie	CDS	20251064	20251867	1000	-	.	Parent=Oglab11g20100.2
12	StringTie	transcript	25831	31742	1000	-	.	Name=Oglab12g00050.1;geneID=Oglab12g00050
12	StringTie	CDS	25831	25926	1000	-	.	Parent=Oglab12g00050.1
12	StringTie	CDS	28036	28755	1000	-	.	Parent=Oglab12g00050.1
12	StringTie	CDS	30888	30978	1000	-	.	Parent=Oglab12g00050.1
12	StringTie	CDS	31193	31406	1000	-	.	Parent=Oglab12g00050.1
12	StringTie	CDS	31715	31742	1000	-	.	Parent=Oglab12g00050.1
12	StringTie	transcript	967467	974582	1000	-	.	Name=Oglab12g01430.1;geneID=Oglab12g01430
12	StringTie	CDS	967467	967949	1000	-	.	Parent=Oglab12g01430.1
12	StringTie	CDS	968815	968958	1000	-	.	Parent=Oglab12g01430.1
12	StringTie	CDS	969649	969963	1000	-	.	Parent=Oglab12g01430.1
12	StringTie	CDS	973248	974582	1000	-	.	Parent=Oglab12g01430.1
12	StringTie	transcript	1989792	1993179	1000	-	.	Name=Oglab12g02960.1;geneID=Oglab12g02960
12	StringTie	CDS	1989792	1989962	1000	-	.	Parent=Oglab12g02960.1
12	StringTie	CDS	1990208	1990327	1000	-	.	Parent=Oglab12g02960.1
12	StringTie	CDS	1990348	1990646	1000	-	.	Parent=Oglab12g02960.1
[truncated: 920 more rows]
